# Supplementary material for: Genome-Wide Analysis and Characterization of the Proline-Rich Extensin-like Receptor Kinases (PERKs) Gene Family Reveals Their Role in Different Developmental Stages and Stress Conditions in Wheat (Triticum aestivum L.)
Source: MDPI journal article supplement (doi:10.3390/plants11040496), 2022-02-11
Supplement: s1 [file s1]

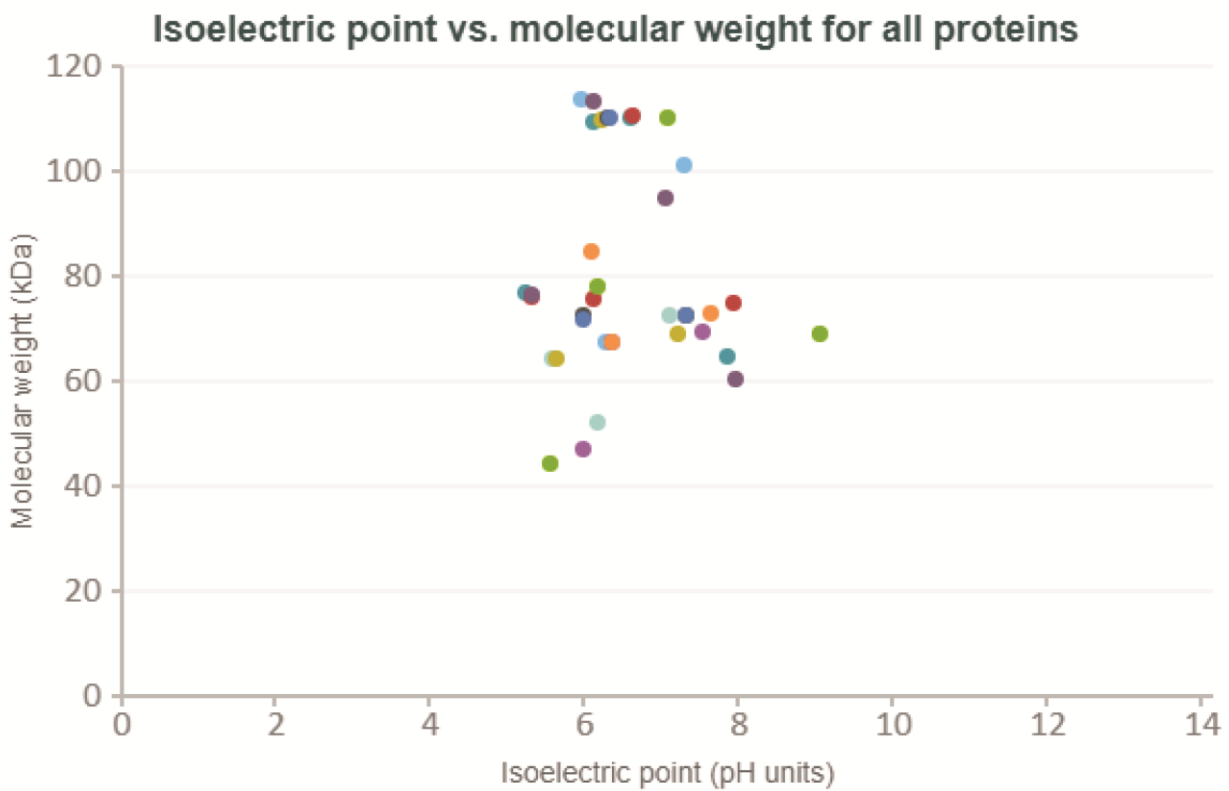

Figure S1. Molecular weight (kDa) vs. isoelectric point plots of TaPERK genes.

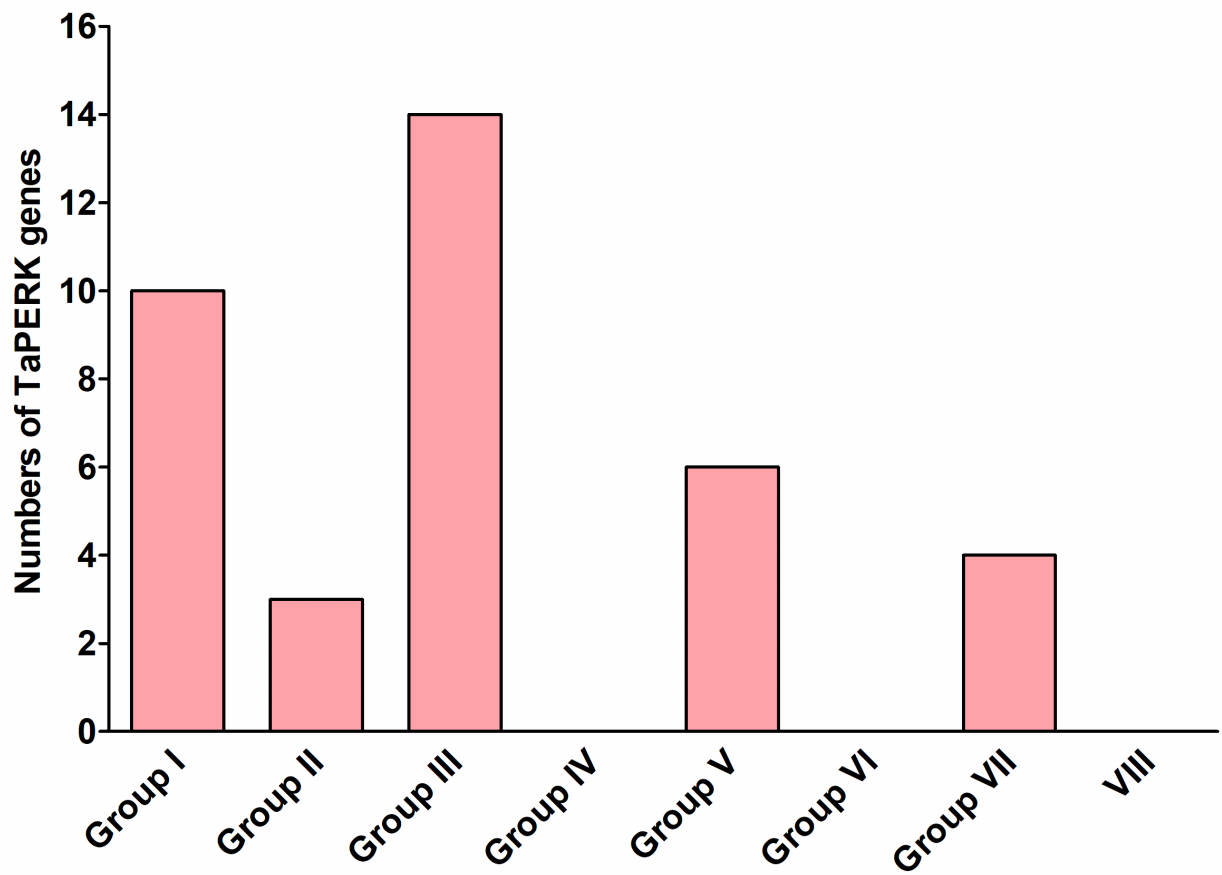

Figure S2. Distribution of TaPERKs in a different group of the phylogenetic tree.

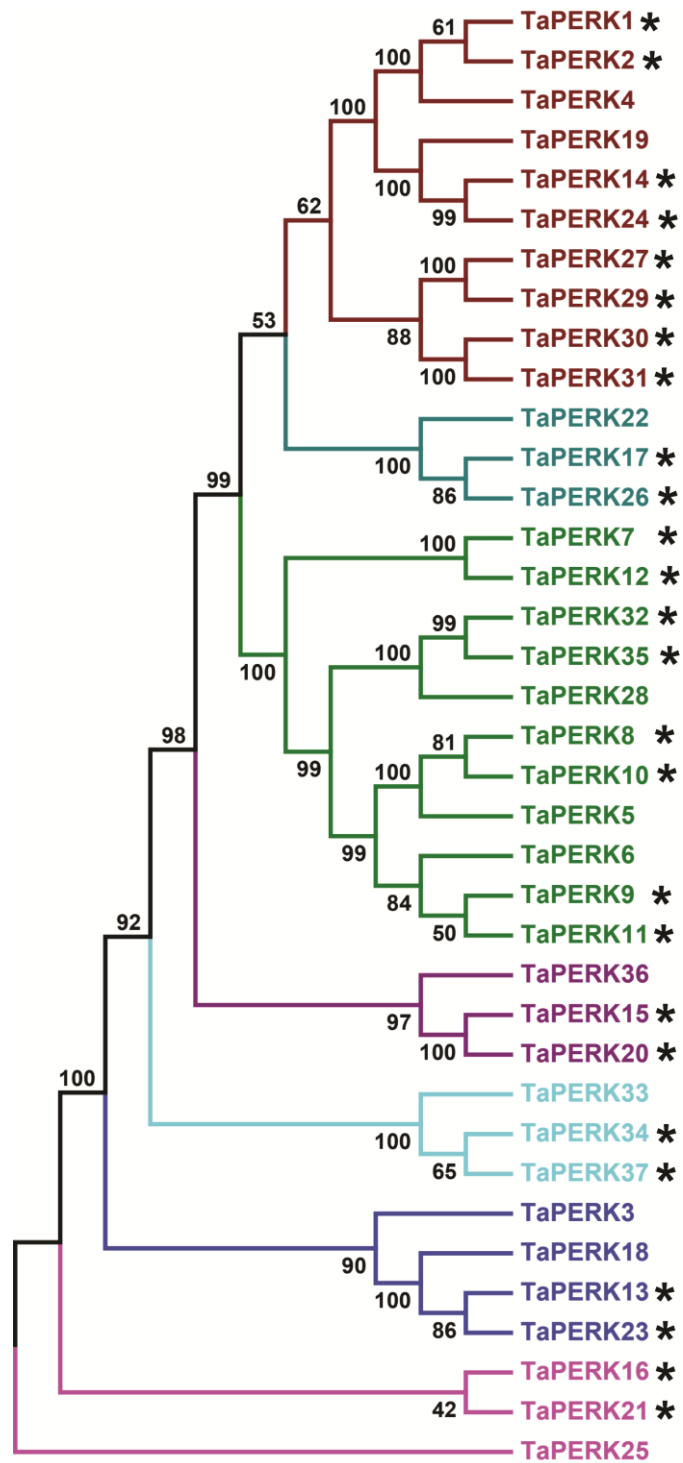

Figure S3. Phylogenetic analysis of TaPERK genes. A phylogenetic tree was constructed using MEGAX with the neighbor-joining (NJ) method and 1000 bootstrap replications. A black asterisk indicates the duplicated genes.

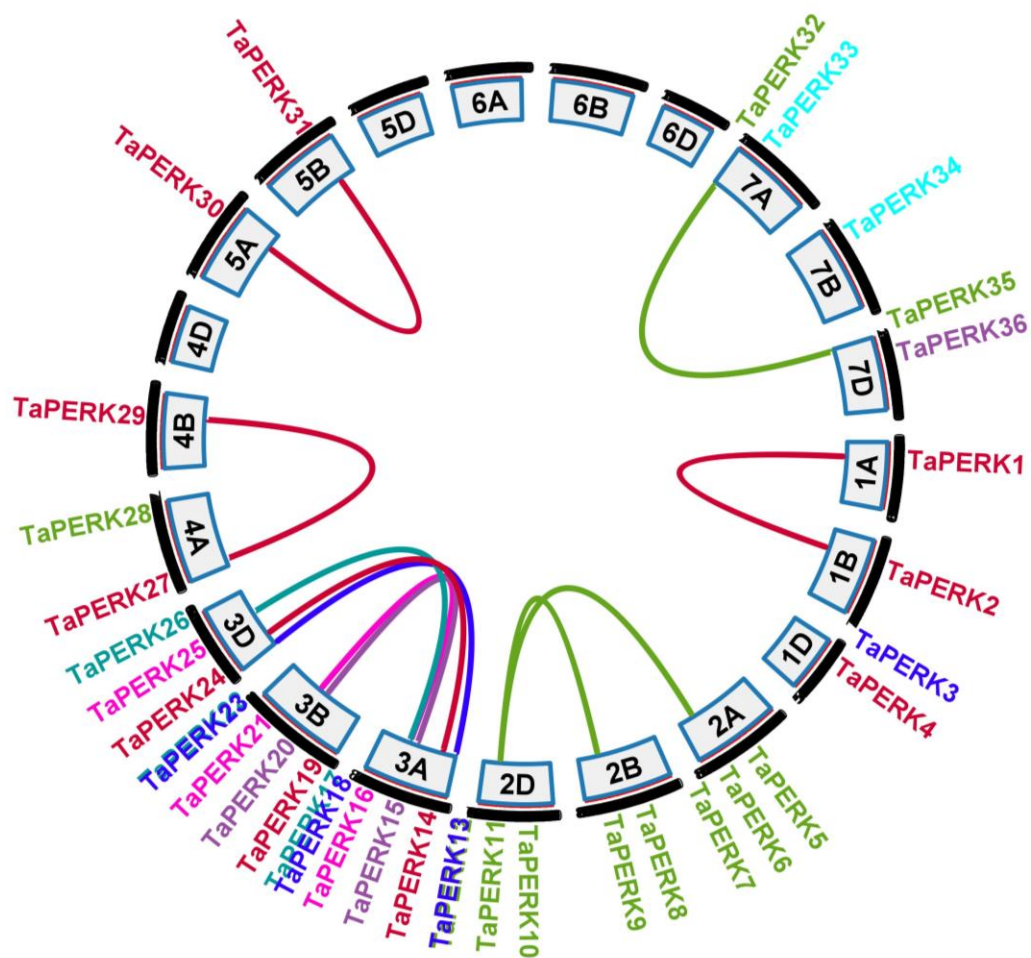

Figure S4. Chromosomal distribution and duplicated PERK gene pairs in wheat. Duplicated PERK gene pairs are connected with lines with distinct colors. The figure was generated using TB tools.



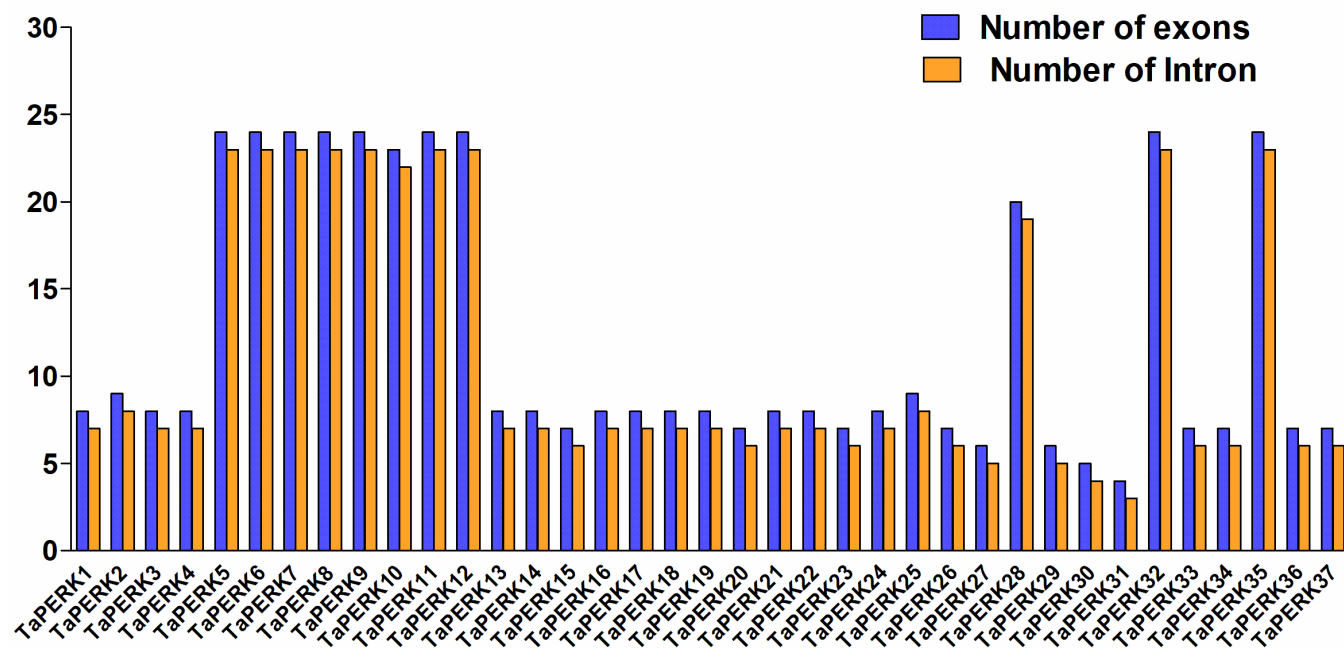

Figure S5. Distribution of exon and introns in TaPERKs gene family.

|            | *                                                                                   | 20                               | *                                                                     | 40                                                                        | *         | 60 | *         | 80 |   |
|------------|-------------------------------------------------------------------------------------|----------------------------------|-----------------------------------------------------------------------|---------------------------------------------------------------------------|-----------|----|-----------|----|---|
| TaPERK1 :  | - - - - -                                                                           |                                  | - - - - -                                                             |                                                                           | - - - - - |    | - - - - - | :  | - |
| TaPERK2 :  | - - - - -                                                                           |                                  | - - - - -                                                             |                                                                           | - - - - - |    | - - - - - | :  | - |
| TaPERK3 :  | - - - - -                                                                           |                                  | - - - - -                                                             |                                                                           | - - - - - |    | - - - - - | :  | - |
| TaPERK4 :  | - - - - -                                                                           |                                  | - - - - -                                                             |                                                                           | - - - - - |    | - - - - - | :  | - |
| TaPERK5 :  | --MGRRRQALHGAALS-                                                                   | L-L-L-A-A-                       | A-H-A-Q-Q-T-D-P--                                                     | G-D-A-A-A-N-A-V-F-A-K-L-G-Q-K-A-L-S-S-W-N-I-S-G-D-P-C-T-G-A-A-T-D-N-T     | : 65      |    |           |    |   |
| TaPERK6 :  | --MKLLHGAALAL-                                                                      | L-L-L-A-A-                       | A-H-A-Q-R-T-P-R-T-H--                                                 | A-G-D-A-A-A-N-A-V-F-A-K-L-G-Q-K-A-S-S-W-N-I-S-G-N-L-C-T-G-A-A-I-D-D-T     | : 64      |    |           |    |   |
| TaPERK7 :  | MGPPSPRWSSCLRHGSVILLPLLLTALSSSWRAAAQAQPFPSPQTDPTEAAA                                | VNAIILGKLGLSAPASWNISGNPCSGAATDDT | : 85                                                                  |                                                                           |           |    |           |    |   |
| TaPERK8 :  | --MGRRRQVQLHGAALS-                                                                  | L-L-L-A-A-V-                     | A-D-A-Q-Q-T-D-P--                                                     | G-D-A-A-A-N-A-V-F-A-K-L-G-Q-K-A-L-S-S-W-N-I-S-G-D-P-C-T-G-A-A-T-D-N-T     | : 65      |    |           |    |   |
| TaPERK9 :  | --MKLLLGAALTLPLLLLTA-                                                               | A-H-A-Q-R-S-P-R-T-H--            | L-G-D-A-A-A-N-A-V-F-A-K-L-G-Q-K-A-S-S-W-N-I-S-G-N-L-C-T-G-A-A-T-D-D-T | : 66                                                                      |           |    |           |    |   |
| TaPERK10 : | --MGRRSRLHGAALS-                                                                    | L-L-L-A-A-                       | A-H-A-Q-Q-T-D-P--                                                     | G-D-A-A-A-N-A-V-F-A-K-L-G-Q-K-A-L-P-S-W-N-I-S-G-D-P-C-T-G-A-A-T-D-N-T     | : 65      |    |           |    |   |
| TaPERK11 : | - - - - -                                                                           |                                  | - - - - -                                                             | M-S-S-Q-L-S-N-V-K-W-S-L-Q-Q-S-T- - - - -                                  | : 16      |    |           |    |   |
| TaPERK12 : | MGRPSPGWSSCLRHGFVLLPLLLSALCSSWRAAAQAQAPPPP-QTEPTEAAAVNAILGKLGLSAPASWNISGNPCSGAATDDT | : 84                             |                                                                       |                                                                           |           |    |           |    |   |
| TaPERK13 : | - - - - -                                                                           |                                  | - - - - -                                                             |                                                                           | :         | -  |           |    |   |
| TaPERK14 : | - - - - -                                                                           |                                  | - - - - -                                                             |                                                                           | :         | -  |           |    |   |
| TaPERK15 : | - - - - -                                                                           |                                  | - - - - -                                                             |                                                                           | :         | -  |           |    |   |
| TaPERK16 : | - - - - -                                                                           |                                  | - - - - -                                                             |                                                                           | :         | -  |           |    |   |
| TaPERK17 : | - - - - -                                                                           |                                  | - - - - -                                                             |                                                                           | :         | -  |           |    |   |
| TaPERK18 : | - - - - -                                                                           |                                  | - - - - -                                                             |                                                                           | :         | -  |           |    |   |
| TaPERK19 : | - - - - -                                                                           |                                  | - - - - -                                                             |                                                                           | :         | -  |           |    |   |
| TaPERK20 : | - - - - -                                                                           |                                  | - - - - -                                                             |                                                                           | :         | -  |           |    |   |
| TaPERK21 : | - - - - -                                                                           |                                  | - - - - -                                                             |                                                                           | :         | -  |           |    |   |
| TaPERK22 : | - - - - -                                                                           |                                  | - - - - -                                                             |                                                                           | :         | -  |           |    |   |
| TaPERK23 : | - - - - -                                                                           |                                  | - - - - -                                                             |                                                                           | :         | -  |           |    |   |
| TaPERK24 : | - - - - -                                                                           |                                  | - - - - -                                                             |                                                                           | :         | -  |           |    |   |
| TaPERK25 : | - - - - -                                                                           |                                  | - - - - -                                                             |                                                                           | :         | -  |           |    |   |
| TaPERK26 : | - - - - -                                                                           |                                  | - - - - -                                                             |                                                                           | :         | -  |           |    |   |
| TaPERK27 : | - - - - -                                                                           |                                  | - - - - -                                                             |                                                                           | :         | -  |           |    |   |
| TaPERK28 : | - - - - -                                                                           |                                  | - - - - -                                                             |                                                                           | :         | -  |           |    |   |
| TaPERK29 : | - - - - -                                                                           |                                  | - - - - -                                                             |                                                                           | :         | -  |           |    |   |
| TaPERK30 : | - - - - -                                                                           |                                  | - - - - -                                                             |                                                                           | :         | -  |           |    |   |
| TaPERK31 : | - - - - -                                                                           |                                  | - - - - -                                                             |                                                                           | :         | -  |           |    |   |
| TaPERK32 : | --MREMRLFIMLHGAALL-                                                                 | - - L-L-A-A-V - - - -            | A-H-A-Q-Q-T-R-T-D-T-D--                                               | P-A-D-A-A-A-L-H-A-V-F-A-K-L-G-Q-K-A-G-P-Q-W-N-I-S-G-D-P-C-T-G-A-A-I-D-N-T | : 69      |    |           |    |   |
| TaPERK33 : | - - - - -                                                                           |                                  | - - - - -                                                             |                                                                           | :         | -  |           |    |   |
| TaPERK34 : | - - - - -                                                                           |                                  | - - - - -                                                             |                                                                           | :         | -  |           |    |   |
| TaPERK35 : | --MRLFIMLHAVALLL-                                                                   | - - L-L-A-A-V - - - -            | A-H-A-Q-Q-T-M-R-T-D-T-D--                                             | P-A-D-A-A-A-L-H-A-V-F-A-K-L-G-Q-K-A-G-P-Q-W-N-I-S-G-D-P-C-T-G-A-A-I-D-N-T | : 66      |    |           |    |   |
| TaPERK36 : | - - - - -                                                                           |                                  | - - - - -                                                             |                                                                           | :         | -  |           |    |   |
| TaPERK37 : | - - - - -                                                                           |                                  | - - - - -                                                             |                                                                           | :         | -  |           |    |   |
| AtPERK1 :  | - - - - -                                                                           |                                  | - - - - -                                                             |                                                                           | :         | -  |           |    |   |
| AtPERK2 :  | - - - - -                                                                           |                                  | - - - - -                                                             |                                                                           | :         | -  |           |    |   |
| AtPERK3 :  | - - - - -                                                                           |                                  | - - - - -                                                             |                                                                           | :         | -  |           |    |   |
| AtPERK4 :  | - - - - -                                                                           |                                  | - - - - -                                                             |                                                                           | :         | -  |           |    |   |
| AtPERK5 :  | - - - - -                                                                           |                                  | - - - - -                                                             |                                                                           | :         | -  |           |    |   |
| AtPERK6 :  | - - - - -                                                                           |                                  | - - - - -                                                             |                                                                           | :         | -  |           |    |   |
| AtPERK7 :  | - - - - -                                                                           |                                  | - - - - -                                                             |                                                                           | :         | -  |           |    |   |
| AtPERK8 :  | - - - - -                                                                           |                                  | - - - - -                                                             |                                                                           | :         | -  |           |    |   |
| AtPERK9 :  | - - - - -                                                                           |                                  | - - - - -                                                             |                                                                           | :         | -  |           |    |   |
| AtPERK10 : | - - - - -                                                                           |                                  | - - - - -                                                             |                                                                           | :         | -  |           |    |   |
| AtPERK11 : | - - - - -                                                                           |                                  | - - - - -                                                             |                                                                           | :         | -  |           |    |   |
| AtPERK12 : | - - - - -                                                                           |                                  | - - - - -                                                             |                                                                           | :         | -  |           |    |   |
| AtPERK13 : | - - - - -                                                                           |                                  | - - - - -                                                             |                                                                           | :         | -  |           |    |   |
| AtPERK14 : | - - - - -                                                                           |                                  | - - - - -                                                             |                                                                           | :         | -  |           |    |   |
| AtPERK15 : | - - - - -                                                                           |                                  | - - - - -                                                             |                                                                           | :         | -  |           |    |   |
| OsPERK1 :  | - - - - -                                                                           |                                  | - - - - -                                                             |                                                                           | :         | -  |           |    |   |
| OsPERK2 :  | - - - - -                                                                           |                                  | - - - - -                                                             |                                                                           | :         | -  |           |    |   |
| OsPERK3 :  | - - - - -                                                                           |                                  | - - - - -                                                             |                                                                           | :         | -  |           |    |   |
| OsPERK4 :  | - - - - -                                                                           |                                  | - - - - -                                                             |                                                                           | :         | -  |           |    |   |
| OsPERK5 :  | --MGRRRQALHGAALS-                                                                   | L-L-L-A-A-                       | A-H-A-Q-Q-T-D-P--                                                     | G-D-A-A-A-N-A-V-F-A-K-L-G-Q-K-A-L-S-S-W-N-I-S-G-D-P-C-T-G-A-A-T-D-N-T     | : 65      |    |           |    |   |
| OsPERK6 :  | --MKLLHGAALAL-                                                                      | L-L-L-A-A-                       | A-H-A-Q-R-T-P-R-T-H--                                                 | A-G-D-A-A-A-N-A-V-F-A-K-L-G-Q-K-A-S-S-W-N-I-S-G-N-L-C-T-G-A-A-I-D-D-T     | : 64      |    |           |    |   |
| OsPERK7 :  | MGPSPRPWSSCLRHGGSVILLPLLLTALSSSWRAAAQAQPFPSPTDPTFAAAA                               | VNAILGKLGLSAPASWNISGNPCSGAATDDT  | : 85                                                                  |                                                                           |           |    |           |    |   |
| OsPERK8 :  | --MGRRRQVQLHGAALS-                                                                  | L-L-L-A-A-V-                     | A-D-A-Q-Q-T-D-P--                                                     | G-D-A-A-A-N-A-V-F-A-K-L-G-Q-K-A-L-S-S-W-N-I-S-G-D-P-C-T-G-A-A-T-D-N-T     | : 65      |    |           |    |   |
| GmPERK1 :  | --MKLLLGAALTLPLLLLTA-                                                               | A-H-A-Q-R-S-P-R-T-H--            | L-G-D-A-A-A-N-A-V-F-A-K-L-G-Q-K-A-S-S-W-N-I-S-G-N-L-C-T-G-A-A-T-D-D-T | : 66                                                                      |           |    |           |    |   |
| GmPERK2 :  | --MGRRSRLHGAALS-                                                                    | L-L-L-A-A-                       | A-H-A-Q-Q-T-D-P--                                                     | G-D-A-A-A-N-A-V-F-A-K-L-G-Q-K-A-L-P-S-W-N-I-S-G-D-P-C-T-G-A-A-T-D-N-T     | : 65      |    |           |    |   |
| GmPERK3 :  | - - - - -                                                                           |                                  | - - - - -                                                             | M-S-S-Q-L-S-N-V-K-W-S-L-Q-Q-S-T- - - - -                                  | : 16      |    |           |    |   |
| GmPERK4 :  | MGRPSPGWSSCLRHGFVLLPLLLSALCSSWRAAAQAQAPPPP-QTEPTEAAAVNAILGKLGLSAPASWNISGNPCSGAATDDT | : 84                             |                                                                       |                                                                           |           |    |           |    |   |
| GmPERK5 :  | - - - - -                                                                           |                                  | - - - - -                                                             |                                                                           | :         | -  |           |    |   |
| GmPER      |                                                                                     |                                  |                                                                       |                                                                           |           |    |           |    |   |

|          | * | 100                                                                                     | *     | 120   | *     | 140   | *     | 160   | *                               |   |
|----------|---|-----------------------------------------------------------------------------------------|-------|-------|-------|-------|-------|-------|---------------------------------|---|
| TaPERK1  | : | -----                                                                                   | ----- | ----- | ----- | ----- | ----- | ----- | MS-                             | 2 |
| TaPERK2  | : | -----                                                                                   | ----- | ----- | ----- | ----- | ----- | ----- | -----                           | - |
| TaPERK3  | : | -----                                                                                   | ----- | ----- | ----- | ----- | ----- | ----- | MAAKAPA                         | 7 |
| TaPERK4  | : | -----                                                                                   | ----- | ----- | ----- | ----- | ----- | ----- | MS-                             | 2 |
| TaPERK5  | : | NIDNPPFNPAIKCECSGG-NASVCRVTRLKIYALDAVGPIPEELRNLTALTNLDSLQNYLTGPLPSFIGELTRMQYMSFGINAL    | :     | 149   |       |       |       |       |                                 |   |
| TaPERK6  | : | DIDNDPFNFNPAIKCLCSTG-NASLCRITRLKIYALDAVGPIPEELWNLTSLTNLNLAQNYLTGPIPSFIGKLAQMQLYSMGINAL  | :     | 148   |       |       |       |       |                                 |   |
| TaPERK7  | : | PLDDNPFNFNPAIKCDCTDQ-NGTLCHVTRLKINSLDAAGPIPEELRNLTALIKLDFRKNLSLTGPLPAFIGELTALKYITVGTNAL | :     | 169   |       |       |       |       |                                 |   |
| TaPERK8  | : | NIDNPPFNPAIKCECTGG-NASVCRVTRLKIYALDAVGPIPEELRNLTALTNLDSLQNYLTGPLPSFIGELTRMQYMSFGINAL    | :     | 149   |       |       |       |       |                                 |   |
| TaPERK9  | : | DIDNDPFNFNPAIKCLCSTG-NASVCRITRLKIYALDAVGPIPEELWNLTSLTNLNLAQNYLTGPIPSFIGELDKMQYLSLGINAL  | :     | 150   |       |       |       |       |                                 |   |
| TaPERK10 | : | NIDNPPFNPAIKCECTGG-NASVCRVTRLKIYALDAVGSIPEELRNLTALTNLDSLQNYLTGPLPSFIGELTRMQYMSFGINAL    | :     | 149   |       |       |       |       |                                 |   |
| TaPERK11 | : | -----VFQAPA-ELAVCR-----                                                                 | :     | 59    |       |       |       |       | NLAQNYLTGPIPSFIGELTRMQYLSLGINAL |   |
| TaPERK12 | : | PLDDNPFNFNPAIKCDCTDQ-NGTLCHVTRLKINSLDAAGPIPEELRNLTALIKLDFRKNLSLTGLLPAFIGELTSLKYITVGTNAL | :     | 168   |       |       |       |       |                                 |   |
| TaPERK13 | : | -----                                                                                   | :     | 4     |       |       |       |       | MASS                            |   |
| TaPERK14 | : | -----                                                                                   | :     | 2     |       |       |       |       | MS-                             |   |
| TaPERK15 | : | -----                                                                                   | :     | 17    |       |       |       |       | MPRIIVESVEHLATAPV               |   |
| TaPERK16 | : | -----                                                                                   | :     | 19    |       |       |       |       | MGGYADPFMPQPASSSSY              |   |
| TaPERK17 | : | -----                                                                                   | :     | 4     |       |       |       |       | MSGP                            |   |
| TaPERK18 | : | -----                                                                                   | :     | 4     |       |       |       |       | MASS                            |   |
| TaPERK19 | : | -----                                                                                   | :     | 2     |       |       |       |       | MS-                             |   |
| TaPERK20 | : | -----                                                                                   | :     | 17    |       |       |       |       | MPRVFVESVEHLANAPA               |   |
| TaPERK21 | : | -----                                                                                   | :     | 19    |       |       |       |       | MGGYADPFMPQPASSSSY              |   |
| TaPERK22 | : | -----                                                                                   | :     | 19    |       |       |       |       | MSSSPPDAGGSFPVTPSP              |   |
| TaPERK23 | : | -----                                                                                   | :     | -     |       |       |       |       | -----                           |   |
| TaPERK24 | : | -----                                                                                   | :     | 3     |       |       |       |       | MSS-                            |   |
| TaPERK25 | : | -----                                                                                   | :     | 19    |       |       |       |       | MGGYADPFMPQPASSSSY              |   |
| TaPERK26 | : | -----                                                                                   | :     | -     |       |       |       |       | -----                           |   |
| TaPERK27 | : | -----                                                                                   | :     | -     |       |       |       |       | -----                           |   |
| TaPERK28 | : | -----                                                                                   | :     | 11    |       |       |       |       | MKEMTFGINAL                     |   |
| TaPERK29 | : | -----                                                                                   | :     | -     |       |       |       |       | -----                           |   |
| TaPERK30 | : | -----                                                                                   | :     | -     |       |       |       |       | -----                           |   |
| TaPERK31 | : | -----                                                                                   | :     | -     |       |       |       |       | -----                           |   |
| TaPERK32 | : | NIDNNDIFKAAIKCEVCTGGNTSVCRIITRLKIYALDAVGPIPEELRNLTALTDLGQNYLTGPLPSFIGELTAMKSMTFGINAL    | :     | 154   |       |       |       |       |                                 |   |
| TaPERK33 | : | -----MRTLLQAKGGGRGAGAG-----                                                             | :     | 40    |       |       |       |       | AADAADAVDTVTG-TTPPSSSTD         |   |
| TaPERK34 | : | -----MRTLLQAKGGGRGPGGG-AAEADEADAVDTVTGTITPPSSSTD                                        | :     | 44    |       |       |       |       |                                 |   |
| TaPERK35 | : | NIDNNDIFKAAIKCEVCTGGNTSVCRIITRLKIYALDAVGPIPEELRNLTALTDLGQNYLTGPLPSFIGELTDMKEMTFGINAL    | :     | 151   |       |       |       |       |                                 |   |
| TaPERK36 | : | -----                                                                                   | :     | 16    |       |       |       |       | MPRLAPSPGSSSEDS                 |   |
| TaPERK37 | : | -----MRTLLQAKGGGRGGGGGGGAADAADAVDTVTGTITPPSSSTD                                         | :     | 45    |       |       |       |       |                                 |   |
| AtPERK1  | : | -----                                                                                   | :     | 8     |       |       |       |       | MSTAPSPG-                       |   |
| AtPERK2  | : | -----                                                                                   | :     | 9     |       |       |       |       | MSSAPPPGG                       |   |
| AtPERK3  | : | -----                                                                                   | :     | 6     |       |       |       |       | MARSNR---                       |   |
| AtPERK4  | : | -----                                                                                   | :     | -     |       |       |       |       | -----                           |   |
| AtPERK5  | : | -----                                                                                   | :     | -     |       |       |       |       | -----                           |   |
| AtPERK6  | : | -----                                                                                   | :     | -     |       |       |       |       | -----                           |   |
| AtPERK7  | : | -----                                                                                   | :     | -     |       |       |       |       | -----                           |   |
| AtPERK8  | : | -----                                                                                   | :     | 8     |       |       |       |       | MSLVPLP---                      |   |
| AtPERK9  | : | -----                                                                                   | :     | 11    |       |       |       |       | MATTFVQPP---VS                  |   |
| AtPERK10 | : | -----                                                                                   | :     | 13    |       |       |       |       | MTTPAQAPREEVS                   |   |
| AtPERK11 | : | -----                                                                                   | :     | 19    |       |       |       |       | MDKVQQQADLFKGTISPFV             |   |
| AtPERK12 | : | -----                                                                                   | :     | 19    |       |       |       |       | MSDLGESPPSSFPAPPADT             |   |
| AtPERK13 | : | -----                                                                                   | :     | 16    |       |       |       |       | MSDSPTSSFPAPSADS                |   |
| AtPERK14 | : | -----                                                                                   | :     | 9     |       |       |       |       | MSLSPSSSP                       |   |
| AtPERK15 | : | -----                                                                                   | :     | -     |       |       |       |       | -----                           |   |
| OsPERK1  | : | -----                                                                                   | :     | 2     |       |       |       |       | MS-                             |   |
| OsPERK2  | : | -----                                                                                   | :     | -     |       |       |       |       | -----                           |   |
| OsPERK3  | : | -----                                                                                   | :     | -     |       |       |       |       | -----                           |   |
| OsPERK4  | : | -----                                                                                   | :     | -     |       |       |       |       | -----                           |   |
| OsPERK5  | : | -----                                                                                   | :     | -     |       |       |       |       | -----                           |   |
| OsPERK6  | : | -----                                                                                   | :     | 19    |       |       |       |       | MSSESQAPSPSPSSSSS               |   |
| OsPERK7  | : | -----                                                                                   | :     | -     |       |       |       |       | -----                           |   |
| OsPERK8  | : | -----                                                                                   | :     | -     |       |       |       |       | -----                           |   |
| GmPERK1  | : | -----                                                                                   | :     | 12    |       |       |       |       | MSAASFPSTST                     |   |
| GmPERK2  | : | -----                                                                                   | :     | -     |       |       |       |       | -----                           |   |
| GmPERK3  | : | -----                                                                                   | :     | -     |       |       |       |       | -----                           |   |
| GmPERK4  | : | -----                                                                                   | :     | 12    |       |       |       |       | MSAVSPSTST                      |   |
| GmPERK5  | : | -----                                                                                   | :     | -     |       |       |       |       | -----                           |   |
| GmPERK6  | : | -----                                                                                   | :     | 10    |       |       |       |       | MFAVAYYSPA                      |   |
| GmPERK7  | : | -----                                                                                   | :     | 10    |       |       |       |       | MLAVAPYSPA                      |   |
| GmPERK8  | : | -----                                                                                   | :     | 8     |       |       |       |       | MSTAPAPS-                       |   |
| GmPERK9  | : | -----                                                                                   | :     | 12    |       |       |       |       | MTSTNPSFNASP                    |   |
| GmPERK10 | : | -----                                                                                   | :     | 22    |       |       |       |       | MSTKHTEEDNDSSYLTIPNKDK          |   |
| GmPERK11 | : | -----                                                                                   | :     | 8     |       |       |       |       | MSTAPAPS-                       |   |
| GmPERK12 | : | -----                                                                                   | :     | -     |       |       |       |       | -----                           |   |
| GmPERK13 | : | -----                                                                                   | :     | 9     |       |       |       |       | MSAPSPS---SS                    |   |
| GmPERK14 | : | -----                                                                                   | :     | -     |       |       |       |       | -----                           |   |
| GmPERK15 | : | -----                                                                                   | :     | -     |       |       |       |       | -----                           |   |
| GmPERK16 | : | -----                                                                                   | :     | 12    |       |       |       |       | MASANPSFNASP                    |   |



|          | 180                          | *                                                                                     | 200                                            | *          | 220             | * | 240                                               | *                   |                |    |
|----------|------------------------------|---------------------------------------------------------------------------------------|------------------------------------------------|------------|-----------------|---|---------------------------------------------------|---------------------|----------------|----|
| TaPERK1  | : -----SPTAAPATTPPAPPAN----- |                                                                                       |                                                |            |                 |   | ATAPPATPSAPPPAIPSPSPAPPANPPFVS-                   |                     | 51             |    |
| TaPERK2  | :                            |                                                                                       |                                                |            |                 |   |                                                   |                     | -              |    |
| TaPERK3  | :                            | PSARSRALASASAPASSRRFNATPAA-----                                                       | DTAAPSTSAT-----                                |            |                 |   | TSPPPSSPPSAPPKLAAS-PPPASPPP-                      |                     | 72             |    |
| TaPERK4  | :                            | -----SPTAAPATTPPAPPAN-----                                                            |                                                |            |                 |   | ATAPPATPSAPPPAIPSPSPAPPANPPFVS-                   |                     | 51             |    |
| TaPERK5  | :                            | SGPLPKELGNLTDIVLSVSSNNFSGSLPSELGNLAKLEQLYIDSAGFSGPLPSSLSKLTMMKTLWASDNDFGTQIPDYIGSWN-  |                                                |            |                 |   |                                                   |                     | 233            |    |
| TaPERK6  | :                            | SGPLPKELGNLTNLVSLGIGSNKFNGSLPSELGNLAKLEQLYIDSAGLSGPLPASLSRLTKMKILWASDNDFGTQIPDYIGSWN- |                                                |            |                 |   |                                                   |                     | 232            |    |
| TaPERK7  | :                            | SGFVPKELWNLTDIVSVALGSNHFNGLPDELGKLTQLQQLYIDSNDFGTGLPEALSQLTNLSTLWASDNSTFTQIPDFLGLSLTN |                                                |            |                 |   |                                                   |                     | 254            |    |
| TaPERK8  | :                            | SGPLPKELGNLTDIVLSVSSNNFSGSLPSELGDLAKLEQLYIDSAGFSGPLPSSLSKLTMMKTLWASDNDFGTQIPDYIGTWN-  |                                                |            |                 |   |                                                   |                     | 233            |    |
| TaPERK9  | :                            | SGPLPKELGNLTNLVSLGIGSNKFNGSLPSELGNLAKLEQLYIDSAGLSGPLPASLSRLTKMKILWASDNDFGTQIPDYIGSWN- |                                                |            |                 |   |                                                   |                     | 234            |    |
| TaPERK10 | :                            | SGPLPKELGNLTDIVLSVSSNNFSGSLPSELGNLAKLEQLYIDSAGFSGPLPSTLSKLTMMKTLWASDNDFGTQIPDYIGSWN-  |                                                |            |                 |   |                                                   |                     | 233            |    |
| TaPERK11 | :                            | SGPLPKELGNLTNLVSLGIGSNKFNGSLPSELGNLAKLEQLYIDSAGLTGPLPASLSKLTMMKILWASDNDFGTQIPDYIGSWN- |                                                |            |                 |   |                                                   |                     | 143            |    |
| TaPERK12 | :                            | SGFVPKELWNLTDIVSVALGSNHFNGLPDELGKLTQLQQLYIDSNDFGTGLPAALSQTLNLSTLWASDNSTFTQIPDFLGLSLTN |                                                |            |                 |   |                                                   |                     | 253            |    |
| TaPERK13 | :                            | PSPSPGATKASPADSVAPATSSPSPAP-----                                                      | VKLFNDTPAD-----                                |            |                 |   | PFAAPPAPSAAVPPQTPEP-PPPPSPSP-                     |                     | 69             |    |
| TaPERK14 | :                            | -----SPPAAPGPASPPGNRT-----                                                            |                                                |            |                 |   | APPPASAPPATNSTPSPSPAP-----                        | PPSSSL-             | 45             |    |
| TaPERK15 | :                            | VGGPPPPPKSSASPTPARSSPPPTTP-----                                                       | PPKSPPPS-----                                  |            |                 |   | SPPPASSGNNQSANLPPGSPPAKKSAS-                      |                     | 81             |    |
| TaPERK16 | :                            | AVPQGGHGQQPQ--APRPPGCPYSSAS-----                                                      | APFVSTSY-----                                  |            |                 |   | HSLPPAASPPFVSS-PPPASPPPELPS-                      |                     | 80             |    |
| TaPERK17 | :                            | SPFVTFVS-----PPAPDAGETPRVTPAPTFFVTVFSPPPDA-----                                       |                                                |            |                 |   | AGTTPPPDASGTPEVTPPPPDAAATPPFVNPF                  |                     | 76             |    |
| TaPERK18 | :                            | PSPSPGATKASPAASVAPATSSPSPAP-----                                                      | VKLFNETPAD-----                                |            |                 |   | PFAAPPAPSAAVPPQTPEP-PPPPSPSP-                     |                     | 69             |    |
| TaPERK19 | :                            | -----SPPAAPGPASPPGNRT-----                                                            |                                                |            |                 |   | APPPASAPPATNSTPSPSPAPASPPSSSL-                    |                     | 50             |    |
| TaPERK20 | :                            | VGGPPAPPQPSASPPQARSPPPPTTP-----                                                       | PPKSPPPS-----                                  |            |                 |   | SPPPASSGNNQSFNLPPGSPPEKSPAS-                      |                     | 81             |    |
| TaPERK21 | :                            | AVPQGGHGQQPQPPAPRPPGCPYSSAS-----                                                      | APFVSTSY-----                                  |            |                 |   | HSLPPAASPPFVSS-PPPASPPPETLPS-                     |                     | 82             |    |
| TaPERK22 | :                            | TPPFTVTPSPPTFFVTFVTPSPPDNFVVTFFVAFVNSPPPDTSMFNPPFVTPSPPPPEATPPPFVTPFVTPFVTPS          |                                                |            |                 |   |                                                   |                     | 104            |    |
| TaPERK23 | :                            |                                                                                       |                                                |            |                 |   |                                                   |                     | -              |    |
| TaPERK24 | :                            | -----SPPAAPGPASPPGNRT-----                                                            |                                                |            |                 |   | APPPASAPPATNSTPSPSPAPPASPPSSSV-                   |                     | 51             |    |
| TaPERK25 | :                            | AVPQGGHGQQPQPPAPRPPGCPYSSAS-----                                                      | APFVSTSY-----                                  |            |                 |   | HSLPPAASPPFVSS-PPPASPPPELPS-                      |                     | 82             |    |
| TaPERK26 | :                            |                                                                                       |                                                |            |                 |   |                                                   |                     | -              |    |
| TaPERK27 | :                            | -----MDDSPLSRGFLGGLGSGPLDFSS--SAADSDGSGGSSSADSDSSGGS--                                |                                                |            |                 |   | SSGSPSPSSSQ-----                                  |                     | 59             |    |
| TaPERK28 | :                            | SGPLPKELGNLKNLKLGLGNNFSGSLPSELGNLAKLEELYIDSSGLSGPLPSSLSQTLTKMKLWASDNDFGTQIPDYIGTWSS   |                                                |            |                 |   |                                                   |                     | 96             |    |
| TaPERK29 | :                            | -----MDDSPLSRGLAPLLGSGPLDFSSAAADSDGSGGSSSGADSSGES--                                   |                                                |            |                 |   | SSGSPSPSPSGFQ-----                                |                     | 60             |    |
| TaPERK30 | :                            |                                                                                       |                                                |            |                 |   |                                                   | MSSNSSSAAPPPPS----- | 14             |    |
| TaPERK31 | :                            |                                                                                       |                                                |            |                 |   |                                                   | MSSNSSSAAPPPPS----- | 14             |    |
| TaPERK32 | :                            | SGFVPKELGNLKNLKLGLGNNFSGSLPTELGNLAKLEELYIDSSGLSGPLPSSLSQTLTKMKLWASDNDFGTQIPDYIGSWSS   |                                                |            |                 |   |                                                   |                     | 239            |    |
| TaPERK33 | :                            | DSPPPPASD-----PPSPSSSSSSPPPPS-----                                                    | PSSPSDFPPS-----                                |            |                 |   | PSSPPSPPLAPPSPPAASSPPFVEVP-                       |                     | 102            |    |
| TaPERK34 | :                            | DSPPPPASDSSDDPPSPSSSSSSPPPPS-----                                                     | PSAPSDPPPS-----                                |            |                 |   | PSSPPSPQLAPPSPPAASSPPFVEALP-                      |                     | 110            |    |
| TaPERK35 | :                            | SGFVPKELGNLKNLKLGLGNNFSGSLPSELGNLAKLEELYIDSSGLSGPLPSSLSQTLTKMKVWASDNDFGTQIPDYIGSWSS   |                                                |            |                 |   |                                                   |                     | 236            |    |
| TaPERK36 | :                            | DDSDGSKSKSKSKAPPPRRSSSSSSDENDDDSSSPSPSS--                                             | DDSDGSSRSSSSSSSDSDSDSKSSQSSRRS--               |            |                 |   |                                                   |                     | 93             |    |
| TaPERK37 | :                            | DSPPPPASDSSDDPPSPSSSSSSPPPT-----                                                      | PSSPSDFPPA-----                                |            |                 |   | PSSPPSPPLAPPSPPAASSPPFVEALP-                      |                     | 111            |    |
| AtPERK1  | :                            | -----TTPSPSPSPPTNSTTT-----                                                            |                                                |            |                 |   | TPPPAASSPPPTTTPSPSPSPSTNSTT-                      |                     | 53             |    |
| AtPERK2  | :                            | TPSPPPQLPIPPPPQLFVTPPPPTTAL-----                                                      |                                                |            |                 |   | PPALPPPPPTTALPPALPPPPPTTVPFIPSTP                  |                     | 72             |    |
| AtPERK3  | :                            | -----CVPNSSIVQIIEEVE-----                                                             |                                                |            |                 |   | KTQLKSRWQQTITMSSASPPFQVFVP-                       |                     | 50             |    |
| AtPERK4  | :                            | -----MAS-SPESAPP-----                                                                 | TNSTSSPSPSNTN-----                             |            |                 |   | STTSSPPA-----                                     | PSPSPPTPPQGS-----   | 45             |    |
| AtPERK5  | :                            | -----MADSFVDSAPAPETSGTNGTSPSNESSTPPSPSSSIAPPPDISAFSPFPAPTQ-----                       |                                                |            |                 |   |                                                   |                     | 64             |    |
| AtPERK6  | :                            | -----MAEQSPENSPPSP-----                                                               | TPSPSSSDNQSSPPSSSPSPAPPDDSSNGSPQPPSSDS-----    |            |                 |   |                                                   |                     | 61             |    |
| AtPERK7  | :                            | -----MAEQSPENSPPAPPSPSPSSNDQQTTSPPPSDNQETTSPPFP-----                                  |                                                |            |                 |   | SSPDIAFPQQQ-----                                  |                     | 60             |    |
| AtPERK8  | :                            | -----ILSPSS-----                                                                      | NSSTTAP-----                                   |            |                 |   | PPLQQT-----                                       | TPSAPFVTP--PPS--    | PPQSPFVVS----- | 55 |
| AtPERK9  | :                            | NSPFTVTS-----                                                                         | PPPLN-----                                     | NATSP----- | ATPPFVTSPL----- |   | PPSAPPENRAPPPPP-FVTSPPFVANGA-----                 |                     | 67             |    |
| AtPERK10 | :                            | LSPSLASPPMALPPPPQSPFGDNATSPTREPTNGNPETNTNP-----                                       |                                                |            |                 |   | AQSSPPPETPLSPP-PEPSPSPSLTGP-----                  |                     | 85             |    |
| AtPERK11 | :                            | ASQP--TNVGGFTDQKIIGSETTQPPATSP-----                                                   | SPSPDTQT-----                                  |            |                 |   | SPPATAAQPPFNQPP--NTTPTPTPSS-----                  |                     | 85             |    |
| AtPERK12 | :                            | APPPTPSENSALPP--VDSSPP--SPPADSSS-----                                                 | TPPLESP-----                                   |            |                 |   | PPDSQLPPLPSILPP--LTDSPPPSDS-----                  |                     | 85             |    |
| AtPERK13 | :                            | APPPTSSDGSAAAPPPTSAPPSPPADSS-----                                                     | PPPALPSL-----                                  |            |                 |   | PPAVFSPPPTVSSPPPPPLDSSPPPPDLT-----                |                     | 84             |    |
| AtPERK14 | :                            | APATSPPPAMSLPPADSVPTDSSPPAPPLSPLPPPLSSPPPLSPPPPLSAPTASPPPLEVESPPSPPIESPPPLLESPPPPPLES |                                                |            |                 |   |                                                   |                     | 94             |    |
| AtPERK15 | :                            | -----MSTDTPISLSSPPAPEF-----                                                           |                                                |            |                 |   |                                                   |                     | 17             |    |
| OsPERK1  | :                            | -----SPSSPP-----                                                                      | PANQT-----                                     |            |                 |   | ATP-----                                          | PPANQTAAP-----      |                | 25 |
| OsPERK2  | :                            | -----MWAREFWSKPAERARP-----                                                            |                                                |            |                 |   | AAFVPPPPPTPPQYVPEEPSAFAKLYA-----                  |                     | 45             |    |
| OsPERK3  | :                            | -----MARP-----                                                                        |                                                |            |                 |   | AAFVPPPP-----                                     | QYVPEEPSAFARLY----- |                | 27 |
| OsPERK4  | :                            |                                                                                       |                                                |            |                 |   |                                                   | MSIVPPP-----        |                | 7  |
| OsPERK5  | :                            |                                                                                       |                                                |            |                 |   |                                                   |                     |                | -  |
| OsPERK6  | :                            | SSSGNGS-----                                                                          | NKAPPPESDNSSS-----                             |            |                 |   | NGSSSSSPTPSSQSSSDSGGSSSPSQGSSSPSPPPSGSSSESHS----- |                     | 89             |    |
| OsPERK7  | :                            |                                                                                       |                                                |            |                 |   |                                                   |                     |                | -  |
| OsPERK8  | :                            |                                                                                       |                                                |            |                 |   | MAASPESSPSAN-----                                 | STTPSAPSPSSSL-----  |                | 26 |
| GmPERK1  | :                            | AAPPLQTTPSSNNTSPSPSTA--TTPPLQQTTPSTSPQQPASP-----                                      |                                                |            |                 |   | PPSTPSFANPPSSP-----                               | PSSPPFMSGT-----     |                | 80 |
| GmPERK2  | :                            | -----MSS-PHNSSPD-----                                                                 | NETPDNSTPDDADNSSSPSSQSPSSPPPS-----             |            |                 |   | SPPSPSPSSPP-----                                  |                     |                | 54 |
| GmPERK3  | :                            | -----MSS-PHNSAPH-----                                                                 | NSSPDNSTPDD-----                               |            |                 |   | ATFNN-----                                        | SIPDNSTPDNSIP-----  |                | 39 |
| GmPERK4  | :                            | AAPPQTSPSANTTSPSPSTV--TTPPPQQTPTSSTSPQQPASP-----                                      |                                                |            |                 |   | PPTTPSFANPPSPSPSPSPSPSPMSGT-----                  |                     |                | 83 |
| GmPERK5  | :                            | -----MASNSDKDSP-----                                                                  | TPSPSSDS--SSQSPSSPPSSQDSSPPPS-----             |            |                 |   | SQDNSSPPSSPP-----                                 |                     |                | 52 |
| GmPERK6  | :                            | ASPLPP--FDITPPSPSMYPTTPAPFVT-----                                                     | PPP-----                                       |            |                 |   | SAVTPLPLTEPLLP--SPSFVSLPPFP-----                  |                     |                | 67 |
| GmPERK7  | :                            | APPPLSLFDITPPSPSMYPTTPAPFVT-----                                                      | PPPETLLVQDSPPSSVTPLPLTEPLLP--SPSPESLPLPLPSSTVT |            |                 |   |                                                   |                     |                | 84 |
| GmPERK8  | :                            | -----SPPPTNGTAPPSTPSA-----                                                            |                                                |            |                 |   | PPPATPSAPPSTPSSPPPATPSSPPPATPSS--                 |                     |                | 57 |
| GmPERK9  | :                            | VAVPPALGGILSPSSSSSPTNSSKSPS-----                                                      | PFNSPQFN-----                                  |            |                 |   | QTQTFNSPAPSSSPAPP--SPSPSQAVVT-----                |                     |                | 78 |
| GmPERK10 | :                            | RKQKSSHDNDKESAPSKPPDLDQESAPSN-----                                                    | SPPSPPPP-----                                  |            |                 |   | PPQLKLPLSPRLKPSISLSLSPSSQLDLSGSPSW                |                     |                | 97 |
| GmPERK11 | :                            | -----SPPANNGTAPPSTP-----                                                              |                                                |            |                 |   | ATPSAPPATPSAPPSTPSSPPPATPSS--                     |                     |                | 52 |
| GmPERK12 | :                            | -----MSS-PHNSSPDSSPDNATPDNSTPDDSDSSSPSS--                                             | QSPSSPPSPS-----                                |            |                 |   | SPPSSPPSSPP-----                                  |                     |                | 58 |
| GmPERK13 | :                            | PAPP-----                                                                             | PELSSA-----                                    |            |                 |   | PPSSTSLPLP-----                                   | SPFSLS-----         |                | 38 |
| GmPERK14 | :                            | -----MSS-PHNSAPH-----                                                                 | NSTPDNSPD-----                                 |            |                 |   | ATPDN-----                                        | SIPDNSTPDATP-----   |                | 39 |
| GmPERK15 | :                            |                                                                                       |                                                |            |                 |   | MSPP-----                                         | PSKYL-----          |                | 10 |
| GmPERK16 | :                            | VAVPPALGAILSPSSSSSPTNSTTPPS-----                                                      |                                                |            |                 |   | PPSSSQFNQTQTQTQTFNSPAPSSPSDPSA--PPSPPPQAVPLT----- |                     |                | 82 |

|          | 260 | *                                                                                   | 280                                        | *    | 300                                                       | *    | 320             | *                         | 340          |       |
|----------|-----|-------------------------------------------------------------------------------------|--------------------------------------------|------|-----------------------------------------------------------|------|-----------------|---------------------------|--------------|-------|
| TaPERK1  | :   | ----                                                                                | ----                                       | ---- | PPPAAPASPP                                                | ---- | ----            | ----                      | APSSPTATP    | : 71  |
| TaPERK2  | :   | ----                                                                                | ----                                       | ---- | ----                                                      | ---- | ----            | ----                      | ----         | : -   |
| TaPERK3  | :   | ----                                                                                | TP-PAALPTPKP                               | ---- | APSTSTPPTTTSPAPPPKRS                                      | ---- | ----            | ----                      | AAAPPTAPAPRP | : 119 |
| TaPERK4  | :   | ----                                                                                | ----                                       | ---- | PPPAAPASPP                                                | ---- | ----            | ----                      | APSSPTATP    | : 71  |
| TaPERK5  | :   | LTDLRFQNSFGGPIPATLSNLVQLTNLRIGDILNGSSSSSLAFISNMTSLNSIVLRNCRISDTLLSVNFSKFTSLNLLDLSFN | NI                                         | :    | 318                                                       |      |                 |                           |              |       |
| TaPERK6  | :   | LTELRFQNSFGGPIPATLSNLQALTSRIGDILNGSSSSSLAFVNMTSLSTIVLRNCRISDKLSSIDFSKLTSLNLLDLSFN   | NI                                         | :    | 317                                                       |      |                 |                           |              |       |
| TaPERK7  | :   | MTQLRLQNSFGGPIPRSLNLIKLSRIGDIVNGSSS-MEFVGNMTSLGELVLRNSKISDTLASVDFSKFVNLTLLDLSFN     | NI                                         | :    | 338                                                       |      |                 |                           |              |       |
| TaPERK8  | :   | LTDLRFQNSFGGPIPATLSNLQALTSRIGDILNGSSSSSLAFISNMTSLNTIVLRNCRISDTLLSVNFSKFTSLNLLDLSFN  | NI                                         | :    | 318                                                       |      |                 |                           |              |       |
| TaPERK9  | :   | LTELRFQNSFGGPIPATLSNLQALTSRIGDILNGSSSSSLAFVNMTSLSTIVLRNCRISDKLSSIDFSKLTSLDLDLSFN    | NI                                         | :    | 319                                                       |      |                 |                           |              |       |
| TaPERK10 | :   | LTDLRFQNSFGGPIPATLSNLVQLTSRIGDILNGSSSSSLAFISNMTSLNTIVLRNCRISDTLLSVNFSKFTSLNLLDLSFN  | NI                                         | :    | 318                                                       |      |                 |                           |              |       |
| TaPERK11 | :   | LTELRFQNSFGGPIPATLSNLQALTSRIGDILNGSSSSSLAFVNMTSLSTIVLRNCRISDKLSSIDFSKLTSLNLLDLSFN   | NI                                         | :    | 228                                                       |      |                 |                           |              |       |
| TaPERK12 | :   | MTQLRLQNSFGGPIPRSLNLIKLSRIGDIVNGSSS-MAFVGNMTSLGELVLRNSKISDTLASVDFSKFVNLTLLDLSFN     | NI                                         | :    | 337                                                       |      |                 |                           |              |       |
| TaPERK13 | :   | ----                                                                                | PPDFVASPPFVP                               | ---- | VASPPPTP-PATMPPAQVPPPPA                                   | ---- | ----            | PAADPPKQSP                | LRP          | : 116 |
| TaPERK14 | :   | ----                                                                                | ----                                       | ---- | PPSTPAATPP                                                | ---- | ----            | ----                      | SPGATPATP    | : 65  |
| TaPERK15 | :   | ----                                                                                | SPPPASPPST                                 | ---- | PPASRSPPPSSPPSPSQ                                         | ---- | ----            | ----                      | QSSPPPAQSTPP | : 124 |
| TaPERK16 | :   | ----                                                                                | PPPALPSSPPPPALS                            | ---- | PPPPDAPPPSLPPSPSPS                                        | ---- | ----            | ----                      | PPPAEVQAPPPP | : 126 |
| TaPERK17 | :   | PPD                                                                                 | ----                                       | ---- | GASTPPP                                                   | ---- | ----            | VNPFVNPPPPPRTP            | ----         | : 101 |
| TaPERK18 | :   | ----                                                                                | PPDPTASPPFVP                               | ---- | VASPPPPAALPPSPPTAVPPPPA                                   | ---- | ----            | PAADPPKQSP                | LRP          | : 117 |
| TaPERK19 | :   | ----                                                                                | ----                                       | ---- | PPSTPAATPP                                                | ---- | ----            | SSGTTTATP                 | ----         | : 70  |
| TaPERK20 | :   | ----                                                                                | SPPPASPPST                                 | ---- | PPASRSPPPSSPPSPSQ                                         | ---- | ----            | QSSPPPAQSTPP              | ----         | : 124 |
| TaPERK21 | :   | ----                                                                                | PPPALPSSPPPPALS                            | ---- | PPPPDAPPPSLPPSPSPS                                        | ---- | ----            | PPPAEVQAPPPP              | ----         | : 128 |
| TaPERK22 | :   | PPPPFVAIPSP                                                                         | ----                                       | ---- | VTAPPPPPVAIPSPLPQVAAVPPTAKPPTIVNPPAFEPSPVQPFVNSPPPPSPPPPP | ---- | ----            | ----                      | ----         | : 179 |
| TaPERK23 | :   | ----                                                                                | ----                                       | ---- | ----                                                      | ---- | ----            | ----                      | ----         | : -   |
| TaPERK24 | :   | ----                                                                                | ----                                       | ---- | PPSTPAATPP                                                | ---- | ----            | SSGTTTATP                 | ----         | : 71  |
| TaPERK25 | :   | ----                                                                                | PPPALPSSPPPPALS                            | ---- | PPPPDAPPPSLPPSPSPS                                        | ---- | ----            | PPPAEVQAPPPP              | ----         | : 128 |
| TaPERK26 | :   | ----                                                                                | ----                                       | ---- | ----                                                      | ---- | ----            | ----                      | ----         | : -   |
| TaPERK27 | :   | ----                                                                                | ----                                       | ---- | ----                                                      | ---- | ----            | SST-QSTPPPG               | ----         | : 69  |
| TaPERK28 | :   | LTELRFQNSFGGPIPATLSNLGQLASLRIGDILNGSSSSSLAFISNLTSLNTIVLRNCRISDKLVSIDFSKFASLNLLDLSFN | NI                                         | :    | 181                                                       |      |                 |                           |              |       |
| TaPERK29 | :   | ----                                                                                | ----                                       | ---- | ----                                                      | ---- | ----            | SST-QSTPPPG               | ----         | : 70  |
| TaPERK30 | :   | ----                                                                                | ----                                       | ---- | ----                                                      | ---- | ----            | KSSPPPSAAPP               | ----         | : 26  |
| TaPERK31 | :   | ----                                                                                | ----                                       | ---- | ----                                                      | ---- | ----            | KSSPPPSAAPP               | ----         | : 26  |
| TaPERK32 | :   | LTELRFQNSFGGPIPATLSNLGQLASLRIGDILNGSSSSSLAFINLTSLNTIVLRNCRISDKLVSIDFSKFTSLNLLDLSFN  | NI                                         | :    | 324                                                       |      |                 |                           |              |       |
| TaPERK33 | :   | ----                                                                                | PPPFVASPPPPDAPPPPPSPVSAAPPPAD-AAPPPDNAPLPD | ---- | ----                                                      | ---- | ----            | NAAAPPSPTQAA              | ----         | : 160 |
| TaPERK34 | :   | ----                                                                                | PPPFVASPPPPDAPPPPPSPVSAAPPPADTAAPPPDNAPPPD | ---- | ----                                                      | ---- | ----            | NAAAPTSPTQAP              | ----         | : 169 |
| TaPERK35 | :   | LTELRLQNSFGGPIPATLSNLGQLASLRIGDILNGSSSSSLAFVNLTSLNTIVLRNCRISDKLVSIDFSKFTSLNLLDLSFN  | NI                                         | :    | 321                                                       |      |                 |                           |              |       |
| TaPERK36 | :   | ----                                                                                | PPPSKSKSSSPSSS                             | ---- | PSRPPSSRNKGKSDSSPPPTDESSG                                 | ---- | ----            | DGEDTSSPPPKRSSPPEQ        | ----         | : 153 |
| TaPERK37 | :   | ----                                                                                | PPPFVASPPPPDAPPPPPSPVSAAPPPAD-AAPPPDNTPPPD | ---- | ----                                                      | ---- | ----            | NAAAPTSPTQAP              | ----         | : 169 |
| AtPERK1  | :   | ----                                                                                | ----                                       | ---- | PPSSPLPP                                                  | ---- | ----            | SLPPSPPGS                 | ----         | : 72  |
| AtPERK2  | :   | SPPPPLTPSPLPSPPTTPSPPLTPSPPTTPSPPLTPSPFPAPITPSPLTPSPPLTPSPPPSPSIPSPPLTPSPPPSSPLRP   | :                                          | :    | 157                                                       |      |                 |                           |              |       |
| AtPERK3  | :   | ----                                                                                | ----                                       | ---- | ELFSEPP                                                   | ---- | ----            | PPKAFVNV                  | ----         | : 67  |
| AtPERK4  | :   | ----                                                                                | ----                                       | ---- | ----                                                      | ---- | ----            | SSSPPDSTSP                | ----         | : 57  |
| AtPERK5  | :   | ----                                                                                | ----                                       | ---- | ----                                                      | ---- | ----            | ETSPPTSPSSSP              | ----         | : 76  |
| AtPERK6  | :   | ----                                                                                | ----                                       | ---- | ----                                                      | ---- | ----            | QSPSPQGNNN                | ----         | : 73  |
| AtPERK7  | :   | ----                                                                                | ----                                       | ---- | ----                                                      | ---- | ----            | ESPPPLPENSS               | ----         | : 72  |
| AtPERK8  | :   | ----                                                                                | PPPFVVSPPPS                                | ---- | SSPPSPFVITSPPTVASS                                        | ---- | ----            | PPPFVVIASPP               | ----         | : 99  |
| AtPERK9  | :   | ----                                                                                | PPPLPK-PESSS-PPQFVIPSPP                    | ---- | PSTSPPPQFVIPSPP                                           | ---- | SASPP-PALVPPLPS | ----                      | SPPPASVPPPP  | : 134 |
| AtPERK10 | :   | ----                                                                                | PPPTTIVSPPPEPSP                            | ---- | PPPLPTEAPPANVSSPPPESSPPPPPP                               | ---- | TEAPPTTPTSPSPPT | ----                      | NPPPPESPPSLP | : 158 |
| AtPERK11 | :   | ----                                                                                | PPPSITPPSP                                 | ---- | PQPQPPQSTPTGDSFVVIP                                       | ---- | ----            | FPKQLPPPSLFP              | ----         | : 131 |
| AtPERK12 | :   | ----                                                                                | PPVDSPTSP                                  | ---- | PPPTSNESSPPEDSETPP                                        | ---- | ----            | APFNENNNPP                | ----         | : 126 |
| AtPERK13 | :   | ----                                                                                | PPSSPPPPDA                                 | ---- | PPPIPIVFP-PPIDS                                           | ---- | ----            | PPPS-TNSPP                | ----         | : 120 |
| AtPERK14 | :   | PSPPSPH                                                                             | ----                                       | ---- | VSAPSGSPPLPFLPAKPSPPPS                                    | ---- | ----            | SPPSETVPPGNTISPPPSLPSESTP | ----         | : 149 |
| AtPERK15 | :   | ----                                                                                | ----                                       | ---- | ----                                                      | ---- | ----            | PSTTDPDA                  | ----         | : 25  |
| OsPERK1  | :   | ----                                                                                | ----                                       | ---- | PPASNSSSP                                                 | ---- | ----            | APG-SLSP                  | ----         | : 44  |
| OsPERK2  | :   | ----                                                                                | ----                                       | ---- | ----                                                      | ---- | ----            | VAGDVVGRA                 | ----         | : 54  |
| OsPERK3  | :   | ----                                                                                | ----                                       | ---- | ----                                                      | ---- | ----            | DVVDR                     | ----         | : 33  |
| OsPERK4  | :   | ----                                                                                | ----                                       | ---- | ----                                                      | ---- | ----            | KSSPPLMAAS-P              | ----         | : 18  |
| OsPERK5  | :   | ----                                                                                | ----                                       | ---- | ----                                                      | ---- | ----            | ----                      | ----         | : -   |
| OsPERK6  | :   | ----                                                                                | PPAPQSSSSSSS                               | ---- | SSSGGSKSSPEAPSPSESSGNGG                                   | ---- | ----            | GGGGGRSSPPFNWSPPPQ        | ----         | : 149 |
| OsPERK7  | :   | ----                                                                                | ----                                       | ---- | ----                                                      | ---- | ----            | ----                      | ----         | : -   |
| OsPERK8  | :   | ----                                                                                | ----                                       | ---- | ----                                                      | ---- | ----            | SKS-PSPPSP                | ----         | : 35  |
| GmPERK1  | :   | ----                                                                                | PPPLVPPSPPPSP                              | ---- | PSTPAAQPAVPSSPPPPSPSPSPV                                  | ---- | SSPPSNPRNNTSP   | ----                      | SPPPQPAAPPQ  | : 150 |
| GmPERK2  | :   | ----                                                                                | ----                                       | ---- | ----                                                      | ---- | ----            | PSSPPSSS-S                | ----         | : 64  |
| GmPERK3  | :   | ----                                                                                | ----                                       | ---- | ----                                                      | ---- | ----            | DNSTPDNSTSNK              | ----         | : 51  |
| GmPERK4  | :   | ----                                                                                | PPPLVPPSPPPSPSPSSPPSPSPAAPFVPPSSPPPP       | ---- | SPSAFVPFNPNNTSPPPSQPPQSPAPPPQPAAPPQ                       | ---- | ----            | PPPPPPS-SSPP              | : 63         |       |
| GmPERK5  | :   | ----                                                                                | ----                                       | ---- | ----                                                      | ---- | ----            | ----                      | ----         | : 63  |
| GmPERK6  | :   | LSPSTP                                                                              | ----                                       | ---- | TAASQPPPLPFATA                                            | ---- | ----            | PATTTFFPPFAVALSP          | ----         | : 110 |
| GmPERK7  | :   | PSPTP                                                                               | ----                                       | ---- | TAESQPPPPFFATA                                            | ---- | ----            | PAPTTFPPFAVAPSP           | ----         | : 127 |
| GmPERK8  | :   | ----                                                                                | ----                                       | ---- | PPPATSSPPPS                                               | ---- | ----            | TPSSPPPATP                | ----         | : 79  |
| GmPERK9  | :   | ----                                                                                | PPPSISLSP                                  | ---- | TLPPSP-DSPPPLPPAS                                         | ---- | ----            | PPSPPATAPP                | ----         | : 119 |
| GmPERK10 | :   | SPPPPSRSPSPS                                                                        | ----                                       | ---- | SLSLSSSPSPS                                               | ---- | ----            | SPPPSPSP                  | ----         | : 137 |
| GmPERK11 | :   | ----                                                                                | ----                                       | ---- | PPPATSSPPPA                                               | ---- | ----            | TPSSPPPATP                | ----         | : 74  |
| GmPERK12 | :   | ----                                                                                | ----                                       | ---- | ----                                                      | ---- | ----            | PSSPPSSPPS                | ----         | : 70  |
| GmPERK13 | :   | ----                                                                                | ----                                       | ---- | PAN-PLP                                                   | ---- | ----            | APPPQSPASISSP             | ----         | : 57  |
| GmPERK14 | :   | ----                                                                                | ----                                       | ---- | ----                                                      | ---- | ----            | DNSIPDN                   | ----         | : 46  |
| GmPERK15 | :   | ----                                                                                | PPPSRPP                                    | ---- | ----                                                      | ---- | ----            | PPSP-PPS                  | ----         | : 41  |
| GmPERK16 | :   | ----                                                                                | PPPSISLSPSPSTP                             | ---- | PPTLPPSP-DSPPPLPPASFTP                                    | ---- | ----            | FVTTSPPSPFVTTSPPSPPATTSPP | ----         | : 146 |



[illegible]



|          |   | 440              |                                         | 460                              |                              | 480                                          |                  | 500              |                      |                   |                             |          |
|----------|---|------------------|-----------------------------------------|----------------------------------|------------------------------|----------------------------------------------|------------------|------------------|----------------------|-------------------|-----------------------------|----------|
| TaPERK1  | : | G----            | GGSGVSTSVVVGAVGGFVLLLLATFVCLCCLRRKKRRRQ | -----                            | -----                        | -----                                        | -----            | PPPPHYGY         | -----                | PP : 181          |                             |          |
| TaPERK2  | : | -----            | -----                                   | -----                            | -----                        | -----                                        | -----            | -----            | -----                | 5                 |                             |          |
| TaPERK3  | : | ---              | TQSAGERGRKASPSGSSNGGASNGVVI             | ---                              | ---                          | AVGAVLAFIVLTLLIAAAVLYTKRRRRGRDDYRAGFRSPPYSEL | -----            | -----            | -----                | 255               |                             |          |
| TaPERK4  | : | -----            | GGSGVSTSVVVGAVGGFVLLLLATFVCLCCLRRKKRRRQ | -----                            | -----                        | -----                                        | -----            | PPPPHYGY         | -----                | PP : 177          |                             |          |
| TaPERK5  | : | QRNTPCFGLSPKSSSF | AVDCGSDRPI                              | SGSDNSLYQ                        | PDAAATLGAASYVVT              | GEPTW                                        | GASNVG           | GREMDASNGSSI     | IIYSSHQ              | FINTL             | 485                         |          |
| TaPERK6  | : | QRNTPCFGLSPKSSSF | AVDCGSDRPI                              | SGSDNSLYQ                        | PDAAATLGAASYVVT              | GEPTW                                        | GASNVG           | GREMDASNGSSI     | IIYSSHQ              | FINTL             | 485                         |          |
| TaPERK7  | : | QRNTPCFGLSPKSSSF | AVDCGSDRPI                              | SGSDNSLYQ                        | PDAAATLGAASYVVT              | GEPTW                                        | GASNVG           | GREMDASNGSSI     | IIYSSHQ              | FINTL             | 508                         |          |
| TaPERK8  | : | QRNTPCFGLSPKSSSF | AVDCGSDRPI                              | SGSDNSLYQ                        | PDAAATLGAASYVVT              | GEPTW                                        | GASNVG           | GREMDASNGSSI     | IIYSSHQ              | FINTL             | 486                         |          |
| TaPERK9  | : | QRNTPCFGLSPKSSSF | AVDCGSDRPI                              | SGSDNSLYQ                        | PDAAATLGAASYVVT              | GEPTW                                        | GASNVG           | GREMDASNGSSI     | IIYSSHQ              | FINTL             | 487                         |          |
| TaPERK10 | : | QRNTPCFGLSPKSSSF | AVDCGSDRPI                              | SGSDNSLYQ                        | PDAAATLGAASYVVT              | GEPTW                                        | GASNVG           | GREMDASNGSSI     | IIYSSHQ              | FINTL             | 486                         |          |
| TaPERK11 | : | QRNTPCFGLSPKSSSF | AVDCGSDRPI                              | SGSDNSLYQ                        | PDAAATLGAASYVVT              | GEPTW                                        | GASNVG           | GREMDASNGSSI     | IIYSSHQ              | FINTL             | 396                         |          |
| TaPERK12 | : | QRNTPCFGLSPKSSSF | AVDCGSDRPI                              | SGSDNSLYQ                        | PDAAATLGAASYVVT              | GEPTW                                        | GASNVG           | GREMDASNGSSI     | IIYSSHQ              | FINTL             | 507                         |          |
| TaPERK13 | : | ---              | SPTFVDPTTPTAPT                          | TPSPSTPGFGPPS                    | ---                          | VPTSTTTTPTPIAPN                              | -----            | ---              | IPQVPSWQDS           | -----             | 233                         |          |
| TaPERK14 | : | -----            | SSALNTATVAGI                            | AVGGGLIALLLASLLCFCMFKKKRRHHHPHPP | -----                        | -----                                        | -----            | PPPPHLLHYGHPPPP  | -----                | 166               |                             |          |
| TaPERK15 | : | ---              | AGTSPPPPIET                             | PTPTSPVAAAGQVPAAPGT              | PSAASLLPSSIMPAS              | -----                                        | ---              | RPPTGTWQSP       | PPGPAVARASPPSLAP     | -----             | 257                         |          |
| TaPERK16 | : | ---              | VAVYSPPPPRIAS                           | PPPPPRHFK                        | ---                          | PHYAPP                                       | -----            | ---              | RSPGRPHSNSTR         | -----             | 222                         |          |
| TaPERK17 | : | LPDATPP          | ---                                     | PPEDVPSSPP                       | PPNDAPAAAPPSPLT              | LSPPPPQ                                      | QSASAP           | -----            | ---                  | STSAKSSSSSGTAV    | ---                         | 228      |
| TaPERK18 | : | ---              | SPT                                     | ---                              | SPTVPATPTAPSP                | STPGFGPPS                                    | ---              | VPSAPT           | TTTTPTPIGPN          | -----             | 232                         |          |
| TaPERK19 | : | ---              | SSALNTATVAGI                            | AVGGGLIALLLASLLCFCMFKKKRRHHHPHPP | -----                        | -----                                        | -----            | PPPPHLLHYGHPPPP  | -----                | 170               |                             |          |
| TaPERK20 | : | ---              | AGTSPPPPIET                             | PTPTSPVAAAGQVPAAPGT              | PSSSSLLPSSGIMPAS             | -----                                        | ---              | GRPPGSWQSP       | PPGPAARASPPSLAP      | -----             | 257                         |          |
| TaPERK21 | : | ---              | VAVYSPPPPRIAS                           | PPPPPRHFK                        | ---                          | PHYAPP                                       | -----            | ---              | RSPGRPHSNSTR         | -----             | 224                         |          |
| TaPERK22 | : | PPDATPP          | ---                                     | PPEDVPYSP                        | PPAPNDAPAEQAPPSALT           | WSPPPPL                                      | STDVP            | -----            | ---                  | ATLAKSSSSSRTTVGLG | ---                         | 311      |
| TaPERK23 | : | -----            | -----                                   | -----                            | -----                        | -----                                        | -----            | ---              | SAHYS                | -----             | 5                           |          |
| TaPERK24 | : | ---              | SSALNTATVAGI                            | AVGGGLIALLLASLLCFCMFKKKRRHHHPHPP | -----                        | -----                                        | -----            | PPPPHLLHYGHPPPP  | -----                | 171               |                             |          |
| TaPERK25 | : | ---              | VAVYSPPPPRV                             | ASPPPPRHHTK                      | ---                          | PHYAPP                                       | -----            | ---              | RSPGRSHLNSTR         | -----             | 223                         |          |
| TaPERK26 | : | -----            | -----                                   | -----                            | -----                        | -----                                        | -----            | -----            | -----                | -----             | -                           |          |
| TaPERK27 | : | ---              | SSESGGGSKGGGSS                          | GRGKGGSKQDDSP                    | PFVEAVVVG                    | -----                                        | -----            | ---              | ---                  | ---               | 162                         |          |
| TaPERK28 | : | QRNTPCFGLSPKSSSF | AVDCGSDRPI                              | SGSDNSLYQ                        | PDAAATLGAASYVVT              | GEPTW                                        | GASNVG           | KEMEANNNGSYI     | IHSPGQ               | FINTLE            | 347                         |          |
| TaPERK29 | : | ---              | SSESGGGSKGGGSS                          | GRGKGGSKQDDSP                    | PFVEAVVVG                    | -----                                        | -----            | ---              | ---                  | ---               | 158                         |          |
| TaPERK30 | : | ---              | RGSGDSSRSSQ                             | SAHRVS                           | ---                          | FNNTAEIIFA                                   | -----            | ---              | ---                  | ---               | 100                         |          |
| TaPERK31 | : | ---              | RGDESSRSSSSQ                            | ASHRVS                           | ---                          | FNNTAEIIFA                                   | -----            | ---              | ---                  | ---               | 104                         |          |
| TaPERK32 | : | QRNTPCFGLSPKSSSF | AVDCGSDRPI                              | SGSDNSLYQ                        | PDAAATLGAASYVVT              | GEPTW                                        | GASNVG           | KEMEANNNGSYI     | IHSPGQ               | FINTL             | 490                         |          |
| TaPERK33 | : | ---              | VTPPTADRSV                              | TAPAPPSTGGG                      | MSSGATAGVAVVAVIA             | FLCFAGV                                      | FVCLTKRRKRKYSDQ  | YYPGFA           | APPYTPQHMSGE         | APFLRV            | 306                         |          |
| TaPERK34 | : | ---              | VTPPTADRSV                              | TAPAPPSTGGG                      | MSSGATAGVAVVAVIA             | FLCFAGV                                      | FVCLTKRRKRKYSDQ  | YYPGFA           | APPYTPQHMSGE         | APFLRV            | 315                         |          |
| TaPERK35 | : | QRNTPCFGLSPKSSSF | AVDCGSDRPI                              | SGSDNSLYQ                        | PDAAATLGAASYVVT              | GEPTW                                        | GASNVG           | KEMEANNNGSYI     | IHSPGQ               | FINTL             | 487                         |          |
| TaPERK36 | : | VNSHPGAP         | ---                                     | PGLVSI                           | APPPTGTVGMSAQLPGAQ           | ---                                          | GATGAGGMQAAGSSAS | -----            | ---                  | TSSTNGAGGSAASASAQ | ---                         | 286      |
| TaPERK37 | : | ---              | VTPPTADRSV                              | TAPAPPSTGGG                      | MSSGATAGVAVVAVIA             | FLCFAGV                                      | FVCLTKRRKRKYSDQ  | YYPGFA           | APPYTPQHMSGE         | APFLRV            | 314                         |          |
| AtPERK1  | : | ---              | SDGLSTG                                 | VVVGIAIGGVA                      | ---                          | ILVLTLLCCLCKKKRRRRHDEAA                      | -----            | ---              | ---                  | ---               | 181                         |          |
| AtPERK2  | : | ---              | SKELSKGAM                               | VGIAIGGGFVLLVALALIFFLCKKKRRR     | ---                          | DNEA                                         | -----            | ---              | ---                  | ---               | 260                         |          |
| AtPERK3  | : | ---              | PSRLSTG                                 | AVVGISIGGG                       | ---                          | VEVLTLLIFFLCKKKRRR                           | ---              | DDKA             | -----                | ---               | 155                         |          |
| AtPERK4  | : | ---              | PPGDTGG                                 | SRSDNPPSSGGSSGGGGGRS             | NTNTAIIVG                    | -----                                        | ---              | ---              | ---                  | ---               | 156                         |          |
| AtPERK5  | : | ---              | RTSGDGGSP                               | SPPSRISPPQNSGDS                  | SSSSGNHF                     | ---                                          | QANIGLIIG        | -----            | ---                  | ---               | 193                         |          |
| AtPERK6  | : | ---              | DRNSPSP                                 | PRALAPPRSSGGGSSN                 | SGNN                         | ---                                          | EPNTAIVG         | -----            | ---                  | ---               | 191                         |          |
| AtPERK7  | : | ---              | KTS                                     | DHSSHSQPRSLAPP                   | ---                          | TSNSGSSNSND                                  | ---              | GLNIGAVIG        | -----                | ---               | 179                         |          |
| AtPERK8  | : | ---              | TTTTSPPPP                               | PATASPPSSNP                      | ---                          | TDPTSLAPPT                                   | -----            | ---              | PLFVVPREKPIAKPTGPAS  | NNGN              | 224                         |          |
| AtPERK9  | : | ---              | PSPPSP                                  | ---                              | SDRPSQ                       | ---                                          | SPPPPPEDTKPQ     | ---              | PRSPNSPPTTFSSP       | ---               | PRSPPEILVPGSNNPSQNNPTLRPLDA | 267      |
| AtPERK10 | : | ---              | TPSPSPSDSKRFV                           | HPSPSPPEETLPPKPS                 | PDPLSNSSSPPTLLPS             | ---                                          | ---              | ---              | SVVSPPSPPRKSVSGPDNPS | PNNPTP            | 316                         |          |
| AtPERK11 | : | ---              | SPGNFLQ                                 | PLDSPLGGS                        | NRVPSSSSSPSPSLSGSNHSGGSNRH   | -----                                        | ---              | ---              | NANSNGDGGTQ          | QSSNESN           | 257                         |          |
| AtPERK12 | : | ---              | PPANFNAPP                               | ---                              | SPFTVPKTPSSG                 | FVVS                                         | ---              | PSLTSPSKGTPTFNQG | -----                | ---               | NGDGGGGGGG                  | 241      |
| AtPERK13 | : | ---              | PPAPPNAPP                               | PRNSSHALLPKSTAAG                 | ---                          | ---                                          | ---              | ---              | ---                  | ---               | 230                         |          |
| AtPERK14 | : | ---              | PAAVTLFP                                | FGPAGQLPDGT                      | VAPPIGVIEPKTSPAESIS          | SGTP                                         | ---              | QPLVP            | -----                | ---               | 282                         |          |
| AtPERK15 | : | ---              | RNAVLTGLITG                             | VVLGATEFVLLGV                    | CI                           | FCVFKYKRRKKLK                                | -----            | ---              | ---                  | ---               | 93                          |          |
| OsPERK1  | : | ---              | SSGLTTF                                 | VVVVGIVGGIVLLV                   | LTILLVCLF                    | KKKKRRHHHHHPHPP                              | -----            | ---              | PPPPHLLHYGHPPPP      | -----             | 130                         |          |
| OsPERK2  | : | ---              | SSGLSTAV                                | VWII                             | VAGVVGAVLALCVLTI             | WIRRCRRQ                                     | -----            | ---              | ---                  | ---               | 134                         |          |
| OsPERK3  | : | ---              | PSFLNS                                  | VAVK                             | ---                          | VAGVVGIVLGLCVLALWIRRWRR                      | -----            | ---              | ---                  | ---               | 120                         |          |
| OsPERK4  | : | ---              | SGSED                                   | VARSALASARRGG                    | ---                          | ---                                          | ---              | ---              | ---                  | ---               | 97                          |          |
| OsPERK5  | : | ---              | -----                                   | -----                            | -----                        | -----                                        | -----            | ---              | ---                  | ---               | 8                           |          |
| OsPERK6  | : | ---              | QSPPSAANQ                               | SVVFI                            | VPVVASNSPPGM                 | LEPPQVIDATPSGAISSTN                          | FPGG             | -----            | ---                  | ---               | 285                         |          |
| OsPERK7  | : | ---              | SHASRL                                  | STSTITFAGG                       | ---                          | LDVTSELVIA                                   | -----            | ---              | ---                  | ---               | 34                          |          |
| OsPERK8  | : | ---              | -----                                   | -----                            | -----                        | -----                                        | -----            | ---              | ---                  | ---               | 107                         |          |
| GmPERK1  | : | ---              | APSTPPSR                                | STPPTSSQ                         | PAPPSNSTPRSSPPSP             | ITNLAPS                                      | -----            | ---              | PPSRLLSSPPPPPAQNGTE  | ---               | NS : 286                    |          |
| GmPERK2  | : | ---              | KSLS                                    | PPSSRN                           | SGSGSDSGSRDS                 | NGGGGDDSSKAIVG                               | -----            | ---              | ---                  | ---               | 159                         |          |
| GmPERK3  | : | ---              | SGKDSS                                  | SNKSLS                           | NEKSLGSNN                    | ---                                          | ---              | ---              | ---                  | ---               | 123                         |          |
| GmPERK4  | : | ---              | EPSTPPSR                                | STSTPPTSSQ                       | PAPPSNSTPRSSPPSP             | ITNLAPP                                      | -----            | ---              | PPSRVLS              | SSPLPSPAQNGTK     | ---                         | NP : 301 |
| GmPERK5  | : | ---              | ---                                     | ---                              | ---                          | ---                                          | ---              | ---              | ---                  | ---               | 156                         |          |
| GmPERK6  | : | ---              | ---                                     | ---                              | ---                          | ---                                          | ---              | ---              | ---                  | ---               | 183                         |          |
| GmPERK7  | : | ---              | ---                                     | ---                              | ---                          | ---                                          | ---              | ---              | ---                  | ---               | 202                         |          |
| GmPERK8  | : | ---              | SSSSS                                   | ISTGVVVGIAV                      | GAVALLVLSILCICCRKKRRRDEEYAP  | ---                                          | ---              | ---              | ---                  | ---               | 199                         |          |
| GmPERK9  | : | ---              | SVSE                                    | SPPKPPSSDV                       | HPPTLP                       | ---                                          | ---              | ---              | ---                  | ---               | 267                         |          |
| GmPERK10 | : | ---              | ---                                     | ---                              | ---                          | ---                                          | ---              | ---              | ---                  | ---               | 241                         |          |
| GmPERK11 | : | ---              | SPSSSSSS                                | ISTGVVVGIAV                      | GAVALLVLSILCICCRKKRRRDEEYHAP | ---                                          | ---              | ---              | ---                  | ---               | 192                         |          |
| GmPERK12 | : | ---              | KSLS                                    | PPSSRN                           | SGSGSDSGSRDS                 | NGGGGDDSSKAIVG                               | -----            | ---              | ---                  | ---               | 166                         |          |
| GmPERK13 | : | ---              | ---                                     | ---                              | ---                          | ---                                          | ---              | ---              | ---                  | ---               | 115                         |          |
| GmPERK14 | : | ---              | ---                                     | ---                              | ---                          | ---                                          | ---              | ---              | ---                  | ---               | 112                         |          |
| GmPERK15 | : | ---              | ---                                     | ---                              | ---                          | ---                                          | ---              | ---              | ---                  | ---               | 149                         |          |
| GmPERK16 | : | ---              | SVSET                                   | PPKPPSSDV                        | VPPTLPSTPPSD                 | PSGSSPPASLPDPPTNKT                           | VVGGPKVSLPSLPT   | ---              | ---                  | ---               | 298                         |          |







|          | 600 | *                                                  | 620                | *                  | 640                   | *                    | 660             | *     | 680            |            |
|----------|-----|----------------------------------------------------|--------------------|--------------------|-----------------------|----------------------|-----------------|-------|----------------|------------|
| TaPERK1  | :   | -----                                              | -----              | -----              | PPPPPPPMINSSGSGSNYS   | SG                   | -EI             | ----- | LP             | : 255      |
| TaPERK2  | :   | -----                                              | -----              | -----              | PPPPPPPMINSSGSGSVSNYS | SG                   | -EI             | ----- | LP             | : 73       |
| TaPERK3  | :   | -----                                              | -----              | -----              | ADPSVHTNYS            | -AG                  | -----           | ----- | SP             | : 286      |
| TaPERK4  | :   | -----                                              | -----              | -----              | PPPPPPPMINSSGSGSNYS   | SG                   | -EI             | ----- | LP             | : 250      |
| TaPERK5  | :   | KNFLEIHLFWAGKGTCCIPDQGYGPAISALSATPNFTPTVRSAVAKKND  | SKTG               | VIAGVVVGIAVLGLVVL  | LAGIFLWRRRQ           | KRRK                 | :               | 655   |                |            |
| TaPERK6  | :   | KNFLEIHLFWAGKGTCCIPDQGYGPAISALSATPNFTPTVRNAAAKKNGS | KTG                | VIAGVVVGIAVLGLVVA  | FAAIFVWR              | -QKRRK               | :               | 653   |                |            |
| TaPERK7  | :   | KNFLEIHLFWAGKGTCCIPDQGYGPAISALSATPNFTPTVRNAAAKKNGS | KTG                | VIAGVVVGIAVLGLVVA  | FAAIFVWR              | -QKRRK               | :               | 676   |                |            |
| TaPERK8  | :   | KNFLEIHLFWAGKGTCCIPDQGYGPAISALSATPNFTPTVRSAVAKKND  | SKTG               | VIAGVVVGIAVLGLVVL  | LAGIFLWRRRQ           | KRRK                 | :               | 654   |                |            |
| TaPERK9  | :   | KNFLEIHLFWAGKGTCCIPDQGYGPAISALSATPNFTPTVRNAAAKKNGS | KTG                | VIAGVVVGIAVLGLVVA  | FAAIFVWR              | -QKRRK               | :               | 655   |                |            |
| TaPERK10 | :   | KNFLEIHLFWAGKGTCCIPDQGYGPAISALSATPNFTPTVRSAVAKKND  | SKTG               | VIAGVVVGIAVLGLVVL  | LAGIFLWRRRQ           | KRRK                 | :               | 656   |                |            |
| TaPERK11 | :   | KNFLEIHLFWAGKGTCCIPDQGYGPAISALSATPNFTPTVRNAAAKKNGS | KTG                | VIAGVVVGIAVLGLVVA  | FAAIFVWR              | -QKRRK               | :               | 564   |                |            |
| TaPERK12 | :   | KNFLEIHLFWAGKGTCCIPDQGYGPAISALSATPNFTPTVRNAAAKKNGS | KTG                | VIAGVVVGIAVLGLVVA  | FAAIFVWR              | -QKRRK               | :               | 675   |                |            |
| TaPERK13 | :   | -----                                              | ASPQVLLG           | -----              | HSEKTKTNY             | -AG                  | -----           | ----- | SP             | : 312      |
| TaPERK14 | :   | -----                                              | ASPQVLLG           | -----              | KQPPFPVNVNSSGSGSHFSG  | GEN                  | -----           | ----- | RP             | : 225      |
| TaPERK15 | :   | -----                                              | -----              | -----              | TMVVPARAPDSYPPS       | NG                   | -----           | ----- | PA             | : 326      |
| TaPERK16 | :   | PPPNYIPSSAGSSLAS                                   | -----              | -----              | DGFYLRSPGYPFMR        | STG                  | -----           | ----- | SH             | : 317      |
| TaPERK17 | :   | -----                                              | -----              | -----              | TTPLQQSHALSTPSSTP     | PLMHSWAQ             | -----           | ----- | SS             | : 299      |
| TaPERK18 | :   | -----                                              | ASPQVLLG           | -----              | GHSEKTKANY            | -AG                  | -----           | ----- | SP             | : 312      |
| TaPERK19 | :   | -----                                              | -----              | -----              | KPPFPFVNVNSSGSGSHFSG  | GEN                  | -----           | ----- | RP             | : 229      |
| TaPERK20 | :   | -----                                              | -----              | -----              | TMVVLAPAPDSYPPS       | NG                   | -----           | ----- | FV             | : 326      |
| TaPERK21 | :   | PPPNYIPSSAGSSLAS                                   | -----              | -----              | DGFYLRSPGYPFMR        | STG                  | -----           | ----- | SH             | : 319      |
| TaPERK22 | :   | -----                                              | -----              | -----              | TTPLQQSHALSTPSSTP     | PLMHSWAQ             | -----           | ----- | SS             | : 384      |
| TaPERK23 | :   | -----                                              | -----              | -----              | HSEKTKTNY             | -AG                  | -----           | ----- | SP             | : 26       |
| TaPERK24 | :   | -----                                              | -----              | -----              | KLPPFPVNVNSSGSGSHFSG  | GEN                  | -----           | ----- | RP             | : 230      |
| TaPERK25 | :   | PPPNYIPSSAGSSLAS                                   | -----              | -----              | DGFYLRSPGYPFMR        | STG                  | -----           | ----- | SH             | : 318      |
| TaPERK26 | :   | -----                                              | -----              | -----              | -----                 | MHSWAQ               | -----           | ----- | SS             | : 8        |
| TaPERK27 | :   | -----                                              | QSGGP              | -----              | VDGHG                 | -----                | -----           | ----- | MSGSG          | -TGS : 253 |
| TaPERK28 | :   | KNFLDIHLFWAGKGTCCIPDQGYGPAISALSATPNFTPTVRNAAVKKNGS | KTG                | VIAGAIIVGVVVLGLLAF | VGIFVWR               | -QKRRK               | :               | 515   |                |            |
| TaPERK29 | :   | -----                                              | QSGGP              | -----              | SDGHG                 | -----                | -----           | ----- | MSGSG          | -SGS : 250 |
| TaPERK30 | :   | -----                                              | AGSTYYTGGPQPQ      | -----              | -----                 | -----                | -----           | ----- | MNSGVYSSPRDQ   | : 194      |
| TaPERK31 | :   | HGVATTASSTYYTGGPQPQ                                | -----              | -----              | WQSGTGAGPSTSTDP       | PGGFW                | -----           | ----- | HNSGVHSSPRDQ   | : 234      |
| TaPERK32 | :   | KNFLDIHLFWAGKGTCCIPDQGYGPAISALSATPNFTPTVRNAVVKK    | -GSKTG             | VIAGAIIVGVVVLGLLAF | VGIFVWR               | -QKRRK               | :               | 657   |                |            |
| TaPERK33 | :   | -----                                              | -----              | -----              | PPQFASANYSSSTMGS      | QC                   | -----           | ----- | PA             | : 365      |
| TaPERK34 | :   | -----                                              | -----              | -----              | PPQFASANYSSSTMGS      | QC                   | -----           | ----- | PA             | : 372      |
| TaPERK35 | :   | KNFLDIHLFWAGKGTCCIPDQGYGPAISALSATPNFTPTVRNAVVKK    | -GSKTG             | VIAGAIIVGVVVLGLLAF | VGIFVWR               | -QKRRK               | :               | 654   |                |            |
| TaPERK36 | :   | -----                                              | MHSGQLTGSNHPGAF    | -----              | YGPPPPGASGGFSYGS      | STPG                 | -----           | ----- | PTD            | : 380      |
| TaPERK37 | :   | -----                                              | -----              | -----              | PPQFASANYSSSTMGS      | QC                   | -----           | ----- | PA             | : 371      |
| AtPERK1  | :   | -----                                              | -----              | -----              | PRKPPPPPPPAFMSSSGSDYS | DL                   | -----           | ----- | FV             | : 251      |
| AtPERK2  | :   | -----                                              | -----              | -----              | PPRPPHFMSSSGSDYS      | SNYSQSV              | -----           | ----- | LP             | : 325      |
| AtPERK3  | :   | -----                                              | -----              | -----              | -----                 | -----                | -----           | ----- | -----          | : -        |
| AtPERK4  | :   | -----                                              | SQG                | -----              | QNQQSTG               | -----                | -----           | ----- | SSMYSGPSRP     | : 254      |
| AtPERK5  | :   | -----                                              | YKGTQDQHVNNMAGQ    | -----              | -----                 | GGGNWGPQ             | -----           | ----- | QFVSG          | -----      |
| AtPERK6  | :   | -----                                              | QGGYNNQSDHVMNLSQQY | -----              | PGSNGNNNMNSPPPP       | PPGWSQPSPPPP         | PPVSGGMGNSS     | ----- | PHSDASNLGTGRT  | : 283      |
| AtPERK7  | :   | -----                                              | QGGYNNQSDHVMNLSQQY | -----              | PGSNGNNNMNSPPPP       | PPGWSQPSPPPP         | PPVSGGMGNSS     | ----- | DFSSNYS-GPHGP  | : 307      |
| AtPERK8  | :   | -----                                              | QGGYNNQSDHVMNLSQQY | -----              | PGSNGNNNMNSPPPP       | PPGWSQPSPPPP         | PPVSGGMGNSS     | ----- | GEMSSNFSGPGYAP | : 306      |
| AtPERK9  | :   | -----                                              | SSPGSDVV           | -----              | -----                 | LFNSRSSAPPMRSHSG     | -----           | ----- | SD             | : 309      |
| AtPERK10 | :   | -----                                              | SSPRSDSA           | -----              | -----                 | FFRMQSSAP-VGAKRS     | -----           | ----- | G              | : 349      |
| AtPERK11 | :   | -----                                              | SSPRSDSA           | -----              | -----                 | LLKTQSSAP-LVGNRSS    | -----           | ----- | NR             | : 400      |
| AtPERK12 | :   | -----                                              | YRQKPGNGNSSAQNS    | -----              | -----                 | SPDTNSLGNPKHGRG      | -----           | ----- | CD             | : 344      |
| AtPERK13 | :   | -----                                              | YQDPGKGYSSGPN GSM  | -----              | -----                 | YNNSSQQQSSMGNSTAGGKY | PHH             | ----- | QM             | : 341      |
| AtPERK14 | :   | -----                                              | YQNPTKGYS-GPGG     | -----              | -----                 | YNS                  | -----           | ----- | RS             | : 325      |
| AtPERK15 | :   | -----                                              | -----              | -----              | -----                 | NAGTNQAHVITMPPPIHAKY | ISSGG           | ----- | CD             | : 359      |
| OsPERK1  | :   | -----                                              | -----              | -----              | -----                 | KKKKEDIEASINRDSLD    | PKDDSN          | ----- | LQ             | : 119      |
| OsPERK2  | :   | -----                                              | -----              | -----              | -----                 | PPPPAPLVHSGSGSNYS    | SG              | ----- | QD             | : 196      |
| OsPERK3  | :   | -----                                              | -----              | -----              | -----                 | FIQHGHPTTPQTSG       | -TFSDAG         | ----- | S              | : 197      |
| OsPERK4  | :   | -----                                              | -----              | -----              | -----                 | HHHHTAPQTSGGT        | TFSDAG          | ----- | S              | : 178      |
| OsPERK5  | :   | -----                                              | GGGGRDTS           | -----              | -----                 | GGPKP                | -----           | ----- | PPPPFW         | -----      |
| OsPERK6  | :   | -----                                              | -----              | -----              | -----                 | LDPSFKTNY            | -AG             | ----- | SP             | : 39       |
| OsPERK7  | :   | -----                                              | VPSSQFGGSSR        | -----              | -----                 | NHHPPPSA             | IMLNSGGASADGGGY | ----- | NSG            | : 381      |
| OsPERK8  | :   | -----                                              | YHHTGGARPQ         | -----              | -----                 | WAATKTGAPSTP         | PNMMHPTN        | ----- | MTGPHVVVRPP    | : 124      |
| GmPERK1  | :   | -----                                              | QHGSSNYSIPPPP      | -----              | -----                 | PPGWHMSSSAGG         | -FSGEMG         | ----- | MGYSSGPGYGP    | : 203      |
| GmPERK2  | :   | -----                                              | ASSPESDSS          | -----              | -----                 | FFKTHSSAP-LVQSGSG    | -----           | ----- | SD             | : 368      |
| GmPERK3  | :   | -----                                              | PHG-DHVVVMQNG      | -----              | -----                 | MGPGGGG-WGAPPPPP     | PFMMSSAE        | ----- | FSSNYSTGPA     | : 261      |
| GmPERK4  | :   | -----                                              | SGPHGGDHVMRIQQQ    | -----              | -----                 | MGMGMG               | -----           | ----- | MGPHSGG-WGAP   | -----      |
| GmPERK5  | :   | -----                                              | ASSPESDSS          | -----              | -----                 | FFKTHSSAP-LVQSGSG    | -----           | ----- | MSSNYSIG-M     | : 235      |
| GmPERK6  | :   | -----                                              | YNNNGEHLNIPPP      | -----              | -----                 | PGAGWGAAQP           | PP-QMISS        | ----- | DMSNSSFSGSHGP  | : 253      |
| GmPERK7  | :   | -----                                              | -----              | -----              | -----                 | NPKLPPRP-LTEGGG      | ASCFSNVS        | ----- | VK             | : 254      |
| GmPERK8  | :   | -----                                              | -----              | -----              | -----                 | NPTLPPPLTEGGG        | ASCFSNVS        | ----- | VK             | : 285      |
| GmPERK9  | :   | -----                                              | -----              | -----              | -----                 | PPPPPPPIISSGSGSNYS   | SG              | ----- | EF             | : 272      |
| GmPERK10 | :   | -----                                              | TSSHNSGTL          | -----              | -----                 | FLRSQSPAN-FLGSGSG    | -----           | ----- | SD             | : 346      |
| GmPERK11 | :   | -----                                              | YVQQP              | -----              | -----                 | IPSP                 | -----           | ----- | PLANNYNGNNSMHL | : 322      |
| GmPERK12 | :   | -----                                              | PHG-DHVVVMQNG      | -----              | -----                 | MGPGGGGWGAPPP        | PFMMSSAD        | ----- | FSSNYSTGPP     | : 259      |
| GmPERK13 | :   | -----                                              | PESDMP             | -----              | -----                 | LHKIRSSAP-LIERASG    | -----           | ----- | G              | : 188      |
| GmPERK14 | :   | -----                                              | SGPHGGDHVMRIQQQ    | -----              | -----                 | MGMGMG               | -----           | ----- | MGPHSGG-WGAP   | -----      |
| GmPERK15 | :   | -----                                              | YVQQP              | -----              | -----                 | IPSP                 | -----           | ----- | PLANNYNGNNSMHL | : 230      |
| GmPERK16 | :   | -----                                              | TSSHNSGTL          | -----              | -----                 | FLRPQSPAN-FLGSGSG    | -----           | ----- | SD             | : 378      |



## Protein tyrosine kinase domain

[illegible]



## Protein tyrosine kinase domain

|          | *         | 780          | *           | 800    | *         | 820       | *         | 840     | *                       |                       |
|----------|-----------|--------------|-------------|--------|-----------|-----------|-----------|---------|-------------------------|-----------------------|
| TaPERK1  | ELVSLVGYG | ISGGKRLVYE   | VTNTTEFSL   | LGK--- | GRPTLE    | PIRLIALG  | AAKGLAYL  | HEEDCH  | PKI                     | IHRDIKSSNILLDEK : 419 |
| TaPERK2  | ELVSLVGYG | ISGGKRLVYE   | VTNTTEFSL   | LGK--- | GRPTLE    | PIRLIALG  | AAKGLAYL  | HEEDCH  | PKI                     | IHRDIKSSNILLDEK : 237 |
| TaPERK3  | ELVSLVGYG | IANSQRLVYD   | VVSNTDTHYSL | ---    | QGGRFVLE  | SANVKIAA  | AAARGIAYL | HEEDCH  | PKI                     | IHRDIKSSNILLDEK : 450 |
| TaPERK4  | ELVSLVGYG | ISGGKRLVYE   | VTNTTEFSL   | LGK--- | GRPTLE    | PIRLIALG  | AAKGLAYL  | HEEDCH  | PKI                     | IHRDIKSSNILLDEK : 414 |
| TaPERK5  | NLVKLYGC  | LEGNKPLVYE   | LENGSDHAF   | FG---  | KGKSSLD   | PTFEICLV  | ARGLS     | FLHESSI | RVVHRDIKASNILLDEK : 820 |                       |
| TaPERK6  | NLVKLYGC  | LEGNKPLVYE   | LENGSDHAF   | FG---  | KGKSSLD   | PTFEICLV  | ARGLS     | FLHESSI | RVVHRDIKASNILLDEK : 818 |                       |
| TaPERK7  | NLVKLYGC  | LEGNKPLVYE   | LENGSDHAF   | FG---  | KGKSSLD   | PTFEICLV  | ARGLS     | FLHESSI | RVVHRDIKASNILLDEK : 841 |                       |
| TaPERK8  | NLVKLYGC  | LEGNKPLVYE   | LENGSDHAF   | FG---  | KGKSSLD   | PTFEICLV  | ARGLS     | FLHESSI | RVVHRDIKASNILLDEK : 819 |                       |
| TaPERK9  | NLVKLYGC  | LEGNKPLVYE   | LENGSDHAF   | FG---  | KGKSSLD   | PTFEICLV  | ARGLS     | FLHESSI | RVVHRDIKASNILLDEK : 820 |                       |
| TaPERK10 | NLVKLYGC  | LEGNKPLVYE   | LENGSDHAF   | FG---  | KGKSSLD   | PTFEICLV  | ARGLS     | FLHESSI | RVVHRDIKASNILLDEK : 821 |                       |
| TaPERK11 | NLVKLYGC  | LEGNKPLVYE   | LENGSDHAF   | FG---  | KGKSSLD   | PTFEICLV  | ARGLS     | FLHESSI | RVVHRDIKASNILLDEK : 729 |                       |
| TaPERK12 | NLVKLYGC  | LEGNKPLVYE   | LENGSDHAF   | FG---  | KGKSSLD   | PTFEICLV  | ARGLS     | FLHESSI | RVVHRDIKASNILLDEK : 840 |                       |
| TaPERK13 | ELVSLVGYG | ISGDQRLVYD   | VVNTDTHYSL  | ---    | GRGVFVLE  | PANVKISAS | AAKGLAYL  | HEEDCH  | PKI                     | IHRDIKSSNILLDEK : 476 |
| TaPERK14 | ELVTLVGYG | ISEDKRLVYE   | VEVTNTTEFSL | LGK--- | RGPTMD    | PSIRIALG  | AAKGLAYL  | HEEDCH  | PKI                     | IHRDIKSSNILLDEK : 388 |
| TaPERK15 | ELVTLVGYG | VTENHRLVYE   | VVSNTDTEHSL | ---    | GEGLFVMD  | PKMKIALG  | AAARGIAYL | HEEDCH  | PKI                     | IHRDIKSSNILLDEK : 491 |
| TaPERK16 | ELVSLVGYG | VSEGQRILVYD  | VVNTDTHYSL  | ---    | VN-EVPLD  | RTVVKIAA  | AAARGIAYL | HEEDCH  | PKI                     | IHRDIKSSNILLDEK : 481 |
| TaPERK17 | NLVSLVGYG | IHAEQRLVYE   | VEKTESQL    | LGK--- | GSARATD   | PRWIKVGS  | AAKGLAYL  | HEEDCH  | PKI                     | IHRDIKSSNILLDEK : 464 |
| TaPERK18 | ELVSLVGYG | ISGDQRLVYD   | VVNTDTHYSL  | ---    | GRGVFVLE  | PANVKISAS | AAKGLAYL  | HEEDCH  | PKI                     | IHRDIKSSNILLDEK : 476 |
| TaPERK19 | ELVTLVGYG | ISEDKRLVYE   | VEVTNTTEFSL | LGK--- | RGPTMD    | PSIRIALG  | AAKGLAYL  | HEEDCH  | PKI                     | IHRDIKSSNILLDEK : 392 |
| TaPERK20 | ELVTLVGYG | VTENHRLVYE   | VVSNTDTEHSL | ---    | GEGLFVMD  | PKMKIALG  | AAARGIAYL | HEEDCH  | PKI                     | IHRDIKSSNILLDEK : 491 |
| TaPERK21 | ELVSLVGYG | VSEGQRILVYD  | VVNTDTHYSL  | ---    | VN-EVPLD  | RTVVKIAA  | AAARGIAYL | HEEDCH  | PKI                     | IHRDIKSSNILLDEK : 483 |
| TaPERK22 | NLVSLVGYG | IHAEQRLVYE   | VEKTESQL    | LGK--- | GSARATD   | PRWIKVGS  | AAKGLAYL  | HEEDCH  | PKI                     | IHRDIKSSNILLDEK : 548 |
| TaPERK23 | ELVSLVGYG | ISGDQRLVYD   | VVNTDTHYSL  | ---    | GRGVFVLE  | PANVKISAS | AAKGLAYL  | HEEDCH  | PKI                     | IHRDIKSSNILLDEK : 190 |
| TaPERK24 | ELVTLVGYG | ISEDKRLVYE   | VEVTNTTEFSL | LGK--- | RGPTMD    | PSIRIALG  | AAKGLAYL  | HEEDCH  | PKI                     | IHRDIKSSNILLDEK : 393 |
| TaPERK25 | ELVSLVGYG | VSEGQRILVYD  | VVNTDTHYSL  | ---    | VN-EVPLD  | RTVVKIAA  | AAARGIAYL | HEEDCH  | PKI                     | IHRDIKSSNILLDEK : 482 |
| TaPERK26 | NLVSLVGYG | IHAEQRLVYE   | VEKTESQL    | LGK--- | GSARATD   | PRWIKVGS  | AAKGLAYL  | HEEDCH  | PKI                     | IHRDIKSSNILLDEK : 175 |
| TaPERK27 | ELVSLVGYG | IAGASQRLVYE  | VVNTDTEHSL  | ---    | GKGLFVMD  | PKMKIALG  | AAARGIAYL | HEEDCH  | PKI                     | IHRDIKSSNILLDEK : 418 |
| TaPERK28 | NLVKLYGC  | LEGNKPLVYE   | LENGSDHAF   | FG---  | KGKSSLD   | PTFEICLV  | ARGLS     | FLHESSI | RVVHRDIKASNILLDEK : 680 |                       |
| TaPERK29 | ELVSLVGYG | IAGSSQRLVYE  | VVNTDTEHSL  | ---    | GKGLFVMD  | PKMKIALG  | AAARGIAYL | HEEDCH  | PKI                     | IHRDIKSSNILLDEK : 415 |
| TaPERK30 | ELVSLVGH  | IAGASQRLVYE  | VVNTDTEHSL  | ---    | GKGLFVMD  | PKMKIALG  | AAARGIAYL | HEEDCH  | PKI                     | IHRDIKSSNILLDEK : 359 |
| TaPERK31 | ELVSLVGH  | IAGTSRLVYE   | VVNTDTEHSL  | ---    | GKGLFVMD  | PKMKIALG  | AAARGIAYL | HEEDCH  | PKI                     | IHRDIKSSNILLDEK : 399 |
| TaPERK32 | NLVKLYGC  | LEGNKPLVYE   | LENGSDHAF   | FG---  | KGKSSLD   | PTFEICLV  | ARGLS     | FLHESSI | RVVHRDIKASNILLDEK : 822 |                       |
| TaPERK33 | ELVSLVGYG | ISEDKRLVYD   | VVNTDTHHNL  | ---    | GRGVFVMD  | PTVVKIAA  | AAARGIAYL | HEEDCH  | PKI                     | IHRDIKSSNILLDEK : 529 |
| TaPERK34 | ELVSLVGYG | ISEDKRLVYD   | VVNTDTHHNL  | ---    | GRGVFVMD  | PTVVKIAA  | AAARGIAYL | HEEDCH  | PKI                     | IHRDIKSSNILLDEK : 536 |
| TaPERK35 | NLVKLYGC  | LEGNKPLVYE   | LENGSDHAF   | FG---  | KGKSSLD   | PTFEICLV  | ARGLS     | FLHESSI | RVVHRDIKASNILLDEK : 819 |                       |
| TaPERK36 | ELVSLVGYG | IAQQHRLVYE   | VEVTGTEHSL  | ---    | GRGVFVMD  | PTVVKIAA  | AAARGIAYL | HEEDCH  | PKI                     | IHRDIKSSNILLDEK : 545 |
| TaPERK37 | ELVSLVGYG | ISEDKRLVYD   | VVNTDTHHNL  | ---    | GRGVFVMD  | PTVVKIAA  | AAARGIAYL | HEEDCH  | PKI                     | IHRDIKSSNILLDEK : 535 |
| AtPERK1  | ELVSLVGYG | MAGVQRLVYE   | VEVTNTTEFSL | LGK--- | GRPTLE    | PIRLIALG  | AAKGLAYL  | HEEDCH  | PKI                     | IHRDIKSSNILLDEK : 415 |
| AtPERK2  | ELVSLVGYG | IADAQRLVYE   | VEVTNTTEFSL | LGK--- | GRPTLE    | PIRLIALG  | AAKGLAYL  | HEEDCH  | PKI                     | IHRDIKSSNILLDEK : 489 |
| AtPERK3  | NLVSLVGYG | IAGAQRILVYE  | VEVTNTTEFSL | LGK--- | GRPTLE    | PIRLIALG  | AAKGLAYL  | HEEDCH  | PKI                     | IHRDIKSSNILLDEK : 318 |
| AtPERK4  | NLVSLVGYG | IADGQRLVYE   | VEVTNTTEFSL | ---    | GKGLFVMD  | PKMKIALG  | AAARGIAYL | HEEDCH  | PKI                     | IHRDIKSSNILLDEK : 419 |
| AtPERK5  | ELVSLVGYG | ISGGQRLVYE   | VEVTNTTEFSL | ---    | GKGLFVMD  | PTVVKIAA  | AAARGIAYL | HEEDCH  | PKI                     | IHRDIKSSNILLDEK : 447 |
| AtPERK6  | ELVSLVGYG | IAGGQRLVYE   | VEVTNTTEFSL | ---    | GKSGKVLMD | PTVVKIAA  | AAARGIAYL | HEEDCH  | PKI                     | IHRDIKSSNILLDEK : 472 |
| AtPERK7  | ELVSLVGYG | SNAGGQRLVYE  | VEVTNTTEFSL | ---    | GKSGTVMD  | PTVVKIAA  | AAARGIAYL | HEEDCH  | PKI                     | IHRDIKSSNILLDEK : 472 |
| AtPERK8  | ELVTLVGYG | ISEQRLVYD    | VVNTDTHYSL  | ---    | APGREVMD  | PTVVKIAA  | AAARGIAYL | HEEDCH  | PKI                     | IHRDIKSSNILLDEK : 474 |
| AtPERK9  | ELVSLVGH  | ISGDRRLVYD   | VVNTDTHYSL  | ---    | GE-KSVLD  | ATVVKIAA  | AAARGIAYL | HEEDCH  | PKI                     | IHRDIKSSNILLDEK : 511 |
| AtPERK10 | NLVSLVGYG | ISGDRRLVYD   | VVNTDTHYSL  | ---    | AGTPTMD   | ATVVKIAA  | AAARGIAYL | HEEDCH  | PKI                     | IHRDIKSSNILLDEK : 565 |
| AtPERK11 | ELVSLVGYG | ISEQRLVYD    | VVNTDTHYSL  | ---    | GKGLFVMD  | PTVVKIAA  | AAARGIAYL | HEEDCH  | PKI                     | IHRDIKSSNILLDEK : 505 |
| AtPERK12 | ELVSLVGYG | ISDQRLVYD    | VVNTDTHYSL  | ---    | GKGLFVMD  | PTVVKIAA  | AAARGIAYL | HEEDCH  | PKI                     | IHRDIKSSNILLDEK : 506 |
| AtPERK13 | ELVSLVGYG | IADSERILVYE  | VEVTNTTEHSL | ---    | GRGVFVMD  | ARVVKIAA  | AAARGIAYL | HEEDCH  | PKI                     | IHRDIKSSNILLDEK : 488 |
| AtPERK14 | ELVSLVGYG | INGDKRLVYE   | VEVTNTTEHSL | ---    | RGSVLEMD  | EMIRIVGA  | AAARGIAYL | HEEDCH  | PKI                     | IHRDIKSSNILLDEK : 524 |
| AtPERK15 | ELVSLVGYG | ITGAQRLVYE   | VEVTNTTEHSL | ---    | ERFVLEMD  | SKMIRIALG | AAARGIAYL | HEEDCH  | PKI                     | IHRDIKSSNILLDEK : 278 |
| OsPERK1  | ELVTLVGYG | ISGGQRLVYE   | VEVTNTTEFSL | ---    | GRPTLE    | PIRLIALG  | AAKGLAYL  | HEEDCH  | PKI                     | IHRDIKSSNILLDEK : 358 |
| OsPERK2  | NLVSLVGYG | ISGNERILVYE  | VEVTNTTEFSL | ---    | GKGLFVMD  | PTVVKIAA  | AAARGIAYL | HEEDCH  | PKI                     | IHRDIKSSNILLDEK : 362 |
| OsPERK3  | NLVSLVGYG | ISGNERILVYE  | VEVTNTTEFSL | ---    | GKGLFVMD  | PTVVKIAA  | AAARGIAYL | HEEDCH  | PKI                     | IHRDIKSSNILLDEK : 338 |
| OsPERK4  | ELVSLVGYG | IAGARRLVYE   | VEVTNTTEFSL | ---    | GKGLFVMD  | PTVVKIAA  | AAARGIAYL | HEEDCH  | PKI                     | IHRDIKSSNILLDEK : 329 |
| OsPERK5  | ELVSLVGYG | ISNNQRLVYD   | VVNTDTHYSL  | ---    | QGGRFVLE  | SANVKIAA  | AAARGIAYL | HEEDCH  | PKI                     | IHRDIKSSNILLDEK : 203 |
| OsPERK6  | ELVSLVGYG | IAAHHRLVYE   | VEVTNTTEHSL | ---    | GRGMFVMD  | PTVVKIAA  | AAARGIAYL | HEEDCH  | PKI                     | IHRDIKSSNILLDEK : 545 |
| OsPERK7  | ELVPLVGYG | IAGAQRILVYD  | VVNTDTEHSL  | ---    | EKGLFVMD  | TTIRIALG  | AAARGIAYL | HEEDCH  | PKI                     | IHRDIKSSNILLDEK : 289 |
| OsPERK8  | ELVSLVGYG | IAAN-QRLVYE  | VEVTNTTEHSL | ---    | GKGLFVMD  | SAIRIALG  | AAARGIAYL | HEEDCH  | PKI                     | IHRDIKSSNILLDEK : 371 |
| GmPERK1  | ELVSLVGYG | IEDNKRLVYD   | VVNTDTHYSL  | ---    | GKGLFVMD  | ANVVKIAA  | AAARGIAYL | HEEDCH  | PKI                     | IHRDIKSSNILLDEK : 533 |
| GmPERK2  | ELVSLVGS  | ISGGQRLVYE   | VEVTNTTEFSL | ---    | GKGRPTMD  | PTVVKIAA  | AAARGIAYL | HEEDCH  | PKI                     | IHRDIKSSNILLDEK : 426 |
| GmPERK3  | ELVSLVGYG | ICGGQRLVYE   | VEVTNTTEHSL | ---    | GKGMPTMD  | PTVVKIAA  | AAARGIAYL | HEEDCH  | PKI                     | IHRDIKSSNILLDEK : 400 |
| GmPERK4  | ELVSLVGYG | IEDSRRLVYD   | VVNTDTHYSL  | ---    | GKGMPTMD  | ANVVKIAA  | AAARGIAYL | HEEDCH  | PKI                     | IHRDIKSSNILLDEK : 548 |
| GmPERK5  | ELVSLVGYG | IESKRLVYE    | VEVTNTTEFSL | ---    | GKGRFVMD  | NTIRIALG  | AAARGIAYL | HEEDCH  | PKI                     | IHRDIKSSNILLDEK : 418 |
| GmPERK6  | ELVEFVGS  | SDTRAERILVYE | VEVTNTTEFSL | ---    | LG-----   | NTIRIALG  | AAARGIAYL | HEEDCH  | PKI                     | IHRDIKSSNILLDEK : 390 |
| GmPERK7  | ELVEFVGYG | ITRAERILVYE  | VEVTNTTEFSL | ---    | LG-----   | SMIRIALG  | AAARGIAYL | HEEDCH  | PKI                     | IHRDIKSSNILLDEK : 450 |
| GmPERK8  | ELVSLVGYG | ITGSQRLVYE   | VEVTNTTEFSL | ---    | GRPTMD    | PTVVKIAA  | AAARGIAYL | HEEDCH  | PKI                     | IHRDIKSSNILLDEK : 434 |
| GmPERK9  | ELVSLVGYG | ISEHQRILVYD  | VVNTDTHYSL  | ---    | GENRFVMD  | PTVVKIAA  | AAARGIAYL | HEEDCH  | PKI                     | IHRDIKSSNILLDEK : 511 |
| GmPERK10 | ELVSLVGYG | ICEQRLVYE    | VEVTNTTEHSL | ---    | ASGMFVMD  | DKIRIALG  | AAARGIAYL | HEEDCH  | PKI                     | IHRDIKSSNILLDEK : 484 |
| GmPERK11 | ELVSLVGYG | ITGSQRLVYE   | VEVTNTTEFSL | ---    | GRPTMD    | PTVVKIAA  | AAARGIAYL | HEEDCH  | PKI                     | IHRDIKSSNILLDEK : 427 |
| GmPERK12 | ELVSLVGS  | ISGGQRLVYE   | VEVTNTTEFSL | ---    | GKGRPTMD  | ATVVKIAA  | AAARGIAYL | HEEDCH  | PKI                     | IHRDIKSSNILLDEK : 424 |
| GmPERK13 | ELVSLVGYG | ISDNRLVYD    | VVNTDTHYSL  | ---    | GRGVFVMD  | TKVVKIAA  | AAARGIAYL | HEEDCH  | PKI                     | IHRDIKSSNILLDEK : 348 |
| GmPERK14 | ELVSLVGYG | ICGGQRLVYE   | VEVTNTTEHSL | ---    | GKGMPTMD  | PTVVKIAA  | AAARGIAYL | HEEDCH  | PKI                     | IHRDIKSSNILLDEK : 391 |
| GmPERK15 | ELVSLVGYG | ICEQRLVYE    | VEVTNTTEHSL | ---    | ESGMFVMD  | AKIRIALG  | AAARGIAYL | HEEDCH  | PKI                     | IHRDIKSSNILLDEK : 392 |
| GmPERK16 | ELVSLVGYG | ISEHQRILVYD  | VVNTDTHYSL  | ---    | GENRFVMD  | PTVVKIAA  | AAARGIAYL | HEEDCH  | PKI                     | IHRDIKSSNILLDEK : 543 |



## Protein tyrosine kinase domain

|          | 860                       | * | 880                 | * | 900                    | * | 920          | * |                    |
|----------|---------------------------|---|---------------------|---|------------------------|---|--------------|---|--------------------|
| TaPERK1  | FEARVADFLGAKFT--S--NN--   |   | TVSTRVMGTFGYLAPEYAS |   | SGLTBKSDFVSSGVMLELI    |   | GRRVDS-      |   | TQTYM : 491        |
| TaPERK2  | FEARVADFLGAKFT--S--NN--   |   | TVSTRVMGTFGYLAPEYAS |   | SGLTBKSDFVSSGVMLELI    |   | GRRVDS-      |   | TQTYM : 309        |
| TaPERK3  | FDALVADFLGAR--A--LAV--    |   | TVSTRVMGTFGYMAPEYAS |   | SGLTBKSDFVSSGVMLELI    |   | GRRVDS-      |   | SRPLG : 522        |
| TaPERK4  | FEARVADFLGAKFT--S--NS--   |   | TVSTRVMGTFGYLAPEYAS |   | SGLTBKSDFVSSGVMLELI    |   | GRRVDS-      |   | TQTYM : 486        |
| TaPERK5  | INPKISDFGLAKY--D--QK--    |   | TVSTKVAGTFGYLAPEYAS |   | MRCHMTBKIDVFAAGVVVLELI |   | AGFPN-YSTED  |   | E : 890            |
| TaPERK6  | INPKISDFGLAKY--D--QK--    |   | TVSTKVAGTFGYLAPEYAS |   | MRCHMTBKIDVFAAGVVVLELI |   | AGFPN-YSTKD  |   | E : 888            |
| TaPERK7  | INPKISDFGLAKY--D--KK--    |   | TVSTKVAGTFGYLAPEYAS |   | MRCHMTBKIDVFAAGVVVLELI |   | VAGESNHHTTLE |   | E : 912            |
| TaPERK8  | INPKISDFGLAKY--D--QK--    |   | TVSTKVAGTFGYLAPEYAS |   | MRCHMTBKIDVFAAGVVVLELI |   | AGFPN-YSTED  |   | E : 889            |
| TaPERK9  | INPKISDFGLAKY--D--QK--    |   | TVSTKVAGTFGYLAPEYAS |   | MRCHMTBKIDVFAAGVVVLELI |   | AGFPN-YSTKD  |   | E : 890            |
| TaPERK10 | INPKISDFGLAKY--D--QK--    |   | TVSTKVAGTFGYLAPEYAS |   | MRCHMTBKIDVFAAGVVVLELI |   | AGFPN-YSTED  |   | E : 891            |
| TaPERK11 | INPKISDFGLAKY--D--QK--    |   | TVSTKVAGTFGYLAPEYAS |   | MRCHMTBKIDVFAAGVVVLELI |   | AGFPN-YSTKD  |   | E : 799            |
| TaPERK12 | INPKISDFGLAKY--D--KK--    |   | TVSTKVAGTFGYLAPEYAS |   | MRCHMTBKIDVFAAGVVVLELI |   | VAGESNHHTTLE |   | E : 911            |
| TaPERK13 | FEARVADFLGAR--A--MFA--    |   | TVSTRVMGTFGYMAPEYAS |   | SGLTBKSDFVSSGVMLELI    |   | GRRVDA-      |   | SNPLG : 548        |
| TaPERK14 | CEARVADFLGAKT--S--NN--    |   | TVSTRVMGTFGYLAPEYAS |   | SGLTBKSDFVSSGVMLELI    |   | GRRVSS-      |   | KQAHM : 460        |
| TaPERK15 | FEARVADFLGAKT--N--SM--    |   | TVSTRVMGTFGYMAPEYAS |   | SGLTBKSDFVSSGVMLELI    |   | GRRVDS-      |   | SQPLG : 563        |
| TaPERK16 | FEARVADFLGAR--A--ASN--    |   | TVSTRVMGTFGYLAPEYAS |   | SGLTBKSDFVSSGVMLELI    |   | GRRVDS-      |   | SQPLG : 553        |
| TaPERK17 | FEPRVADFLGACQ--EAEH--     |   | TVSTRVMGTFGYLAPEYAS |   | SGLTBKSDFVSSGVMLELI    |   | GRRVSS-      |   | SSDHQ : 536        |
| TaPERK18 | FEARVADFLGAR--A--MFA--    |   | TVSTRVMGTFGYMAPEYAS |   | SGLTBKSDFVSSGVMLELI    |   | GRRVDA-      |   | SNPLG : 548        |
| TaPERK19 | CEARVADFLGAKT--S--NN--    |   | TVSTRVMGTFGYLAPEYAS |   | SGLTBKSDFVSSGVMLELI    |   | GRRVSS-      |   | KQAHM : 464        |
| TaPERK20 | FEARVADFLGAKT--N--SM--    |   | TVSTRVMGTFGYMAPEYAS |   | SGLTBKSDFVSSGVMLELI    |   | GRRVDS-      |   | SQPLG : 563        |
| TaPERK21 | FEARVADFLGAR--A--ASN--    |   | TVSTRVMGTFGYLAPEYAS |   | SGLTBKSDFVSSGVMLELI    |   | GRRVDS-      |   | SQPLG : 555        |
| TaPERK22 | FEPRVADFLGACQ--EAEH--     |   | TVSTRVMGTFGYLAPEYAS |   | SGLTBKSDFVSSGVMLELI    |   | GRRVSS-      |   | SSDHQ : 620        |
| TaPERK23 | FEARVADFLGAR--A--MFA--    |   | TVSTRVMGTFGYMAPEYAS |   | SGLTBKSDFVSSGVMLELI    |   | GRRVDA-      |   | SNPLG : 262        |
| TaPERK24 | CEARVADFLGAKT--S--NN--    |   | TVSTRVMGTFGYLAPEYAS |   | SGLTBKSDFVSSGVMLELI    |   | GRRVSS-      |   | KQAHM : 465        |
| TaPERK25 | FEARVADFLGAR--A--ASN--    |   | TVSTRVMGTFGYLAPEYAS |   | SGLTBKSDFVSSGVMLELI    |   | GRRVDS-      |   | SQPLG : 554        |
| TaPERK26 | FEPRVADFLGACQ--EAEH--     |   | TVSTRVMGTFGYLAPEYAS |   | SGLTBKSDFVSSGVMLELI    |   | GRRVSS-      |   | SSDHQ : 247        |
| TaPERK27 | FEARVADFLGAKT--T--NN--    |   | TVSTRVMGTFGYLAPEYAS |   | SGLTBKSDFVSSGVMLELI    |   | GRRVDP-      |   | SNYM : 489         |
| TaPERK28 | INPKISDFGLAKY--D--QE--    |   | TVSTKVAGTFGYLAPEYAS |   | MRCHMTBKIDVFAAGVVVLELI |   | AGFPNYYTTED  |   | Q : 751            |
| TaPERK29 | FEARVADFLGAKT--T--NN--    |   | TVSTRVMGTFGYLAPEYAS |   | SGLTBKSDFVSSGVMLELI    |   | GRRVDP-      |   | SNYM : 486         |
| TaPERK30 | FEARVADFLGAKT--Y--GI--    |   | TVSTRVMGTFGYLAPEYAS |   | SGLTBKSDFVSSGVMLELI    |   | GRRVDA-      |   | TAHLVL : 432       |
| TaPERK31 | FEARVADFLGAKT--Y--GI--    |   | TVSTRVMGTFGYLAPEYAS |   | SGLTBKSDFVSSGVMLELI    |   | GRRVDA-      |   | TAHLVL : 472       |
| TaPERK32 | INPKISDFGLAKY--D--QE--    |   | TVSTKVAGTFGYLAPEYAS |   | MRCHMTBKIDVFAAGVVVLELI |   | AGFPNYYTTED  |   | Q : 893            |
| TaPERK33 | FEARVADFLGAR--A--EDV--    |   | TVSTRVMGTFGYLAPEYAS |   | SGLTBKSDFVSSGVMLELI    |   | GRRVDS-      |   | SRPLG : 601        |
| TaPERK34 | FEARVADFLGAR--A--EDV--    |   | TVSTRVMGTFGYLAPEYAS |   | SGLTBKSDFVSSGVMLELI    |   | GRRVDS-      |   | SRPLG : 608        |
| TaPERK35 | INPKISDFGLAKY--D--QE--    |   | TVSTKVAGTFGYLAPEYAS |   | MRCHMTBKIDVFAAGVVVLELI |   | AGFPNYYTTED  |   | Q : 890            |
| TaPERK36 | FEARVADFLGAKS--N--TH--    |   | TVSTRVMGTFGYLAPEYAS |   | SGLTBKSDFVSSGVMLELI    |   | GRRVDDQ-     |   | DRPLG : 617        |
| TaPERK37 | FEARVADFLGAR--A--EDV--    |   | TVSTRVMGTFGYLAPEYAS |   | SGLTBKSDFVSSGVMLELI    |   | GRRVDS-      |   | SRPLG : 607        |
| AtPERK1  | FEARVADFLGAKT--S--TN--    |   | TVSTRVMGTFGYLAPEYAS |   | SGLTBKSDFVSSGVMLELI    |   | GRRVDA-      |   | NNVYV : 487        |
| AtPERK2  | FEARVADFLGAKT--S--TN--    |   | TVSTRVMGTFGYLAPEYAS |   | SGLTBKSDFVSSGVMLELI    |   | GRRVIDV-     |   | NNVHA : 561        |
| AtPERK3  | FEARVADFLGAKT--L--TN--    |   | TVSTRVMGTFGYLAPEYAS |   | SGLTBKSDFVSSGVMLELI    |   | GRRVDA-      |   | NNVYA : 390        |
| AtPERK4  | FDAMVADFLGAKT--S--NN--    |   | TVSTRVMGTFGYLAPEYAS |   | SGLTBKSDFVSSGVMLELI    |   | GRRVIDN-     |   | SITM : 490         |
| AtPERK5  | FEPRVADFLGAKS--Q--NY--    |   | TVSTRVMGTFGYLAPEYAS |   | SGLTBKSDFVSSGVMLELI    |   | GRRVIDL-     |   | TGEM : 518         |
| AtPERK6  | FEARVADFLGAKS--Q--NV--    |   | TVSTRVMGTFGYLAPEYAS |   | SGLTBKSDFVSSGVMLELI    |   | GRRVIDL-     |   | TGEM : 543         |
| AtPERK7  | FEARVADFLGAKS--Q--NN--    |   | TVSTRVMGTFGYLAPEYAS |   | SGLTBKSDFVSSGVMLELI    |   | GRRVIDL-     |   | SGDM : 543         |
| AtPERK8  | FEALVADFLGAKAQEL--LN--    |   | TVSTRVMGTFGYMAPEYAS |   | SGLTBKSDFVSSGVMLELI    |   | GRRVIDT-     |   | SQPLG : 548        |
| AtPERK9  | FDARVADFLGAR--A--LCN--    |   | TVSTRVMGTFGYMAPEYAS |   | SGLTBKSDFVSSGVMLELI    |   | GRRVIDT-     |   | SQPLG : 583        |
| AtPERK10 | FEARVADFLGAKT--L--CN--    |   | TVSTRVMGTFGYLAPEYAS |   | SGLTBKSDFVSSGVMLELI    |   | GRRVIDA-     |   | SQPLG : 637        |
| AtPERK11 | FEARVADFLGAR--N--DTAQ--   |   | TVSTRVMGTFGYLAPEYAS |   | SGLTBKSDFVSSGVMLELI    |   | GRRVIDT-     |   | SQPLG : 577        |
| AtPERK12 | FEARVADFLGAR--N--DTQ--    |   | TVSTRVMGTFGYLAPEYAS |   | SGLTBKSDFVSSGVMLELI    |   | GRRVIDQ-     |   | TQPLG : 578        |
| AtPERK13 | FEARVADFLGAKN--D--STQ--   |   | TVSTRVMGTFGYLAPEYAS |   | SGLTBKSDFVSSGVMLELI    |   | GRRVIDQ-     |   | YQPLG : 560        |
| AtPERK14 | FEARVADFLGAKFF--S--TNSSET |   | TVSTRVMGTFGYMAPEYAS |   | SGLTBKSDFVSSGVMLELI    |   | GRRVIDQ-     |   | KDSST : 599        |
| AtPERK15 | FEARVADFLGARSS--L--TD--   |   | TVSTRVMGTFGYLAPEYAS |   | SGLTBKSDFVSSGVMLELI    |   | GRRVIDK-     |   | SQPPA : 350        |
| OsPERK1  | FEARVADFLGAKT--S--NN--    |   | TVSTRVMGTFGYLAPEYAS |   | SGLTBKSDFVSSGVMLELI    |   | GRRVRS-      |   | NQSQM : 430        |
| OsPERK2  | FEPRVADFLGAKYQ--PGNH--    |   | TVSTRVMGTFGYLAPEYAS |   | SGLTBKSDFVSSGVMLELI    |   | GRRVRS-      |   | SESYM : 434        |
| OsPERK3  | FEPRVADFLGAKYQ--PGNH--    |   | TVSTRVMGTFGYLAPEYAS |   | SGLTBKSDFVSSGVMLELI    |   | GRRVRS-      |   | SESYM : 410        |
| OsPERK4  | FEARVADFLGAKT--S--NN--    |   | TVSTRVMGTFGYLAPEYAS |   | SGLTBKSDFVSSGVMLELI    |   | GRRVIDA      |   | AADHPWPASFME : 409 |
| OsPERK5  | FEARVADFLGAR--A--LAV--    |   | TVSTRVMGTFGYMAPEYAS |   | SGLTBKSDFVSSGVMLELI    |   | GRRVIDA-     |   | SRPLG : 275        |
| OsPERK6  | FEARVADFLGAKT--N--TH--    |   | TVSTRVMGTFGYLAPEYAS |   | SGLTBKSDFVSSGVMLELI    |   | GRRVIDQ-     |   | TQPLG : 617        |
| OsPERK7  | FEPLVADFGMAKT--S--ENV--   |   | TVSTRVMGTFGYLAPEYAS |   | SGLTBKSDFVSSGVMLELI    |   | GRRVADR      |   | SSYG : 360         |
| OsPERK8  | FEARVADFLGAKT--T--TN--    |   | TVSTRVMGTFGYLAPEYAS |   | SGLTBKSDFVSSGVMLELI    |   | GRRVIDT-     |   | SNYM : 442         |
| GmPERK1  | FEARVADFLGAKT--L--AN--    |   | TVSTRVMGTFGYMAPEYAS |   | SGLTBKSDFVSSGVMLELI    |   | GRRVIDA-     |   | SQPLG : 605        |
| GmPERK2  | FEARVADFLGAKT--T--NN--    |   | TVSTRVMGTFGYLAPEYAS |   | SGLTBKSDFVSSGVMLELI    |   | GRRVIDH-     |   | TNAM : 497         |
| GmPERK3  | FEARVADFLGAKT--N--TN--    |   | TVSTRVMGTFGYLAPEYAS |   | SGLTBKSDFVSSGVMLELI    |   | GRRVIDL-     |   | TNAM : 471         |
| GmPERK4  | FEARVADFLGAKT--L--AN--    |   | TVSTRVMGTFGYMAPEYAS |   | SGLTBKSDFVSSGVMLELI    |   | GRRVIDA-     |   | SQPLG : 620        |
| GmPERK5  | FEARVADFLGAKS--Q--TN--    |   | TVSTRVMGTFGYLAPEYAS |   | SGLTBKSDFVSSGVMLELI    |   | GRRVNNN-     |   | TGEY : 489         |
| GmPERK6  | FEPRVADFLGAKF--P--NDSCIS  |   | TVSTRVMGTFGYLAPEYAS |   | SGLTBKSDFVSSGVMLELI    |   | GRRVIDT      |   | AGS-R : 464        |
| GmPERK7  | FEPRVADFLGAKF--P--NDSCIS  |   | TVSTRVMGTFGYLAPEYAS |   | SGLTBKSDFVSSGVMLELI    |   | GRRVIDT      |   | AGS-R : 524        |
| GmPERK8  | FEARVADFLGAKS--S--VN--    |   | TVSTRVMGTFGYLAPEYAS |   | SGLTBKSDFVSSGVMLELI    |   | GRRVIDK-     |   | NQTFM : 506        |
| GmPERK9  | FEARVADFLGAKT--L--SN--    |   | TVSTRVMGTFGYMAPEYAS |   | SGLTBKSDFVSSGVMLELI    |   | GRRVIDA-     |   | SQPIG : 583        |
| GmPERK10 | FEARVADFLGAR--A--DASN--   |   | TVSTRVMGTFGYMAPEYAS |   | SGLTBKSDFVSSGVMLELI    |   | GRRVIDQ-     |   | TQPLG : 556        |
| GmPERK11 | FEARVADFLGARFS--S--VN--   |   | TVSTRVMGTFGYLAPEYAS |   | SGLTBKSDFVSSGVMLELI    |   | GRRVIDK-     |   | NQTYM : 499        |
| GmPERK12 | FEARVADFLGAKT--T--NN--    |   | TVSTRVMGTFGYLAPEYAS |   | SGLTBKSDFVSSGVMLELI    |   | GRRVIDH-     |   | TNAM : 495         |
| GmPERK13 | FEARVADFLGAKT--V--AN--    |   | TVSTRVMGTFGYVAPEYAS |   | SGLTBKSDFVSSGVMLELI    |   | GRRVIDI-     |   | SQFVG : 420        |
| GmPERK14 | FEARVADFLGAKT--N--TN--    |   | TVSTRVMGTFGYLAPEYAS |   | SGLTBKSDFVSSGVMLELI    |   | GRRVIDL-     |   | TNAM : 462         |
| GmPERK15 | FEARVADFLGAR--A--DAAN--   |   | TVSTRVMGTFGYMAPEYAS |   | SGLTBKSDFVSSGVMLELI    |   | GRRVIDQ-     |   | TQPLG : 464        |
| GmPERK16 | FEARVADFLGAKT--L--SN--    |   | TVSTRVMGTFGYMAPEYAS |   | SGLTBKSDFVSSGVMLELI    |   | GRRVIDQ-     |   | SQPIG : 615        |



# Protein tyrosine kinase domain

|          | 940                                       | *    | 960 | *        | 980 | *   | 1000 | *    | 1020 |      |      |      |     |    |     |        |       |       |       |
|----------|-------------------------------------------|------|-----|----------|-----|-----|------|------|------|------|------|------|-----|----|-----|--------|-------|-------|-------|
| TaPERK1  | DD- <b>SLVDWARFL</b> MRALEDGN----         | YDE  | VDA | LGKDFNPN | EA  | AMT | ACAA | ACVH | SAAR | RR   | SM   | SV   | VRA | EG | --- | DVSLDD | : 567 |       |       |
| TaPERK2  | DD- <b>SLVDWARFL</b> MRALEDGN----         | YDE  | VDA | LGKDFNPN | EA  | AMT | ACAA | ACVH | SAAR | RR   | SM   | SV   | VRA | EG | --- | DVSLDD | : 385 |       |       |
| TaPERK3  | DE- <b>SLVDWARFL</b> SRALETGK----         | LEG  | VDP | LEKNE    | NE  | VE  | FM   | ES   | AA   | AC   | IN   | HS   | SS  | RR | SM  | SV     | VRA   | : 597 |       |
| TaPERK4  | DD- <b>SLVDWARFL</b> MRALEDGN----         | YDE  | VDA | LGKDFNPN | EA  | AMT | ACAA | ACVH | SAAR | RR   | SM   | SV   | VRA | EG | --- | DVSLDD | : 562 |       |       |
| TaPERK5  | NKVYF <b>FEV</b> WVEIYENNHP-----          | LD   | VDP | LE       | EF  | DS  | ET   | LA   | AA   | KV   | LL   | CT   | QG  | PH | CR  | SS     | SR    | V     | : 959 |
| TaPERK6  | NKVYF <b>FEV</b> WVEIYEDNHP-----          | LD   | VDP | LE       | EF  | DS  | ET   | LA   | AA   | KV   | LL   | CT   | QG  | PH | CR  | SS     | SR    | V     | : 957 |
| TaPERK7  | ETTY <b>FEK</b> VWDY <b>Y</b> ENGNNP----- | LD   | VDP | LE       | EF  | DS  | ET   | LA   | AA   | KV   | LL   | CT   | QG  | PH | CR  | SS     | SR    | V     | : 981 |
| TaPERK8  | NKVYF <b>FEV</b> WVEIYENNHP-----          | LD   | VDP | LE       | EF  | DS  | ET   | LA   | AA   | KV   | LL   | CT   | QG  | PH | CR  | SS     | SR    | V     | : 958 |
| TaPERK9  | NKVYF <b>FEV</b> WVEIYEDNRA-----          | LD   | VDP | LE       | EF  | DS  | ET   | LA   | AA   | KV   | LL   | CT   | QG  | PH | CR  | SS     | SR    | V     | : 959 |
| TaPERK10 | NKVYF <b>FEV</b> WVEIYENNHP-----          | LD   | VDP | LE       | EF  | DS  | ET   | LA   | AA   | KV   | LL   | CT   | QG  | PH | CR  | SS     | SR    | V     | : 960 |
| TaPERK11 | NKVYF <b>FEV</b> WVEIYEDNRP-----          | LD   | VDP | LE       | EF  | DS  | ET   | LA   | AA   | KV   | LL   | CT   | QG  | PH | CR  | SS     | SR    | V     | : 868 |
| TaPERK12 | ETTY <b>FEK</b> VWDY <b>Y</b> ENGNNP----- | LD   | VDP | LE       | EF  | DS  | ET   | LA   | AA   | KV   | LL   | CT   | QG  | PH | CR  | SS     | SR    | V     | : 980 |
| TaPERK13 | DE- <b>SLVDWARFL</b> TQALETGN----         | AGE  | LD  | P        | LD  | KN  | NE   | VE   | FM   | EA   | AA   | AC   | IN  | HS | SS  | RR     | SM    | SV    | : 623 |
| TaPERK14 | DD- <b>SLVDWARFL</b> TQALEDGN----         | HDA  | VDP | HL       | GID | FN  | DN   | EA   | AMT  | ACAA | ACVH | SAAR | RR  | SM | SV  | VRA    | EG    | ---   | : 536 |
| TaPERK15 | EE- <b>SLVDWARFL</b> VDALETDD----         | FRE  | AD  | P        | LE  | CR  | YS   | KI   | EN   | FM   | EA   | AA   | AC  | IN | HS  | SS     | RR    | SM    | : 639 |
| TaPERK16 | DE- <b>SLVDWARFL</b> SQAIEHRD----         | FGD  | P   | DP       | LE  | KN  | KE   | EN   | FM   | EA   | AA   | AC   | IN  | HS | SS  | RR     | SM    | SV    | : 628 |
| TaPERK17 | PE- <b>SLVDWARFL</b> TKALEEEN----         | YEE  | LD  | P        | EL  | GT  | NY   | DA   | YD   | AA   | LV   | CA   | AA  | AV | Q   | AR     | SR    | PM    | : 612 |
| TaPERK18 | DE- <b>SLVDWARFL</b> TQALETGN----         | AGE  | LD  | P        | LD  | KN  | NE   | VE   | FM   | EA   | AA   | AC   | IN  | HS | SS  | RR     | SM    | SV    | : 623 |
| TaPERK19 | DD- <b>SLVDWARFL</b> TQALEDGN----         | HDA  | VDP | HL       | GID | FN  | DN   | EA   | AMT  | ACAA | ACVH | SAAR | RR  | SM | SV  | VRA    | EG    | ---   | : 540 |
| TaPERK20 | EE- <b>SLVDWARFL</b> VDALETDD----         | FRE  | AD  | P        | LE  | CR  | YS   | KI   | EN   | FM   | EA   | AA   | AC  | IN | HS  | SS     | RR    | SM    | : 639 |
| TaPERK21 | DE- <b>SLVDWARFL</b> SQAIEHRD----         | FGD  | P   | DP       | LE  | KN  | KE   | EN   | FM   | EA   | AA   | AC   | IN  | HS | SS  | RR     | SM    | SV    | : 630 |
| TaPERK22 | PE- <b>SLVDWARFL</b> TKALEEEN----         | YEE  | LD  | P        | EL  | GT  | NY   | DA   | YD   | AA   | LV   | CA   | AA  | AV | Q   | AR     | SR    | PM    | : 696 |
| TaPERK23 | DE- <b>SLVDWARFL</b> TQALETGN----         | VGE  | LD  | P        | LD  | KN  | NE   | VE   | FM   | EA   | AA   | AC   | IN  | HS | SS  | RR     | SM    | SV    | : 337 |
| TaPERK24 | DD- <b>SLVDWARFL</b> TQALEDGN----         | HDA  | VDP | HL       | GID | FN  | DN   | EA   | AMT  | ACAA | ACVH | SAAR | RR  | SM | SV  | VRA    | EG    | ---   | : 541 |
| TaPERK25 | DE- <b>SLVDWARFL</b> SQAIEHRD----         | FGD  | P   | DP       | LE  | KN  | KE   | EN   | FM   | EA   | AA   | AC   | IN  | HS | SS  | RR     | SM    | SV    | : 629 |
| TaPERK26 | PE- <b>SLVDWARFL</b> TKALEEEN----         | YEE  | LD  | P        | EL  | GT  | NY   | DA   | YD   | AA   | LV   | CA   | AA  | AV | Q   | AR     | SR    | PM    | : 623 |
| TaPERK27 | ED- <b>SLVDWARFL</b> ARALSEGGS----        | FDE  | VDP | LE       | KN  | YD  | RQ   | EN   | FM   | EA   | AA   | AC   | IN  | HS | SS  | RR     | SM    | SV    | : 566 |
| TaPERK28 | NKVYF <b>FEV</b> WVEIYEDGQP-----          | LD   | VDP | LE       | EF  | DS  | ET   | LA   | AA   | KV   | LL   | CT   | QG  | PH | CR  | SS     | SR    | V     | : 820 |
| TaPERK29 | ED- <b>SLVDWARFL</b> ARALSEGNN----        | FDE  | VDP | LE       | KN  | YD  | RQ   | EN   | FM   | EA   | AA   | AC   | IN  | HS | SS  | RR     | SM    | SV    | : 563 |
| TaPERK30 | ED- <b>SLVDWARFL</b> ARALADG----          | DYDA | VDP | LE       | KN  | YD  | RQ   | EN   | FM   | EA   | AA   | AC   | IN  | HS | SS  | RR     | SM    | SV    | : 508 |
| TaPERK31 | ED- <b>SLVDWARFL</b> ARALADG----          | DYDA | VDP | LE       | KN  | YD  | RQ   | EN   | FM   | EA   | AA   | AC   | IN  | HS | SS  | RR     | SM    | SV    | : 548 |
| TaPERK32 | SKVYF <b>FEV</b> WVEIYEDGQP-----          | LD   | VDP | LE       | EF  | DS  | ET   | LA   | AA   | KV   | LL   | CT   | QG  | PH | CR  | SS     | SR    | V     | : 962 |
| TaPERK33 | DE- <b>SLVDWARFL</b> NRAIDEQE-----        | FEE  | VDP | LE       | KN  | YD  | RQ   | EN   | FM   | EA   | AA   | AC   | IN  | HS | SS  | RR     | SM    | SV    | : 678 |
| TaPERK34 | DE- <b>SLVDWARFL</b> NRAIDEQE-----        | FEE  | VDP | LE       | KN  | YD  | RQ   | EN   | FM   | EA   | AA   | AC   | IN  | HS | SS  | RR     | SM    | SV    | : 685 |
| TaPERK35 | SKVYF <b>FEV</b> WVEIYEDGQP-----          | LD   | VDP | LE       | EF  | DS  | ET   | LA   | AA   | KV   | LL   | CT   | QG  | PH | CR  | SS     | SR    | V     | : 959 |
| TaPERK36 | EE- <b>SLVDWARFL</b> ADAIETGN----         | HDE  | VDP | LE       | KN  | YD  | RQ   | EN   | FM   | EA   | AA   | AC   | IN  | HS | SS  | RR     | SM    | SV    | : 696 |
| TaPERK37 | DE- <b>SLVDWARFL</b> NRAIDEQE-----        | FEE  | VDP | LE       | KN  | YD  | RQ   | EN   | FM   | EA   | AA   | AC   | IN  | HS | SS  | RR     | SM    | SV    | : 684 |
| AtPERK1  | DD- <b>SLVDWARFL</b> NRAIEEGD----         | FE   | GA  | S        | MG  | NE  | YD   | RE   | EN   | FM   | EA   | AA   | AC  | IN | HS  | SS     | RR    | SM    | : 563 |
| AtPERK2  | DN- <b>SLVDWARFL</b> NQVSELGN----         | FE   | V   | V        | K   | L   | N    | E    | Y    | D    | R    | E    | EN  | FM | EA  | AA     | AC    | IN    | : 637 |
| AtPERK3  | DD- <b>SLVDWARFL</b> VQALEESN----         | FE   | GA  | S        | MG  | NE  | YD   | RE   | EN   | FM   | EA   | AA   | AC  | IN | HS  | SS     | RR    | SM    | : 466 |
| AtPERK4  | DD- <b>SLVDWARFL</b> ARALE-DGN----        | FNE  | AD  | P        | LE  | GR  | NY   | PQ   | EN   | FM   | EA   | AA   | AC  | IN | HS  | SS     | RR    | SM    | : 566 |
| AtPERK5  | ED- <b>SLVDWARFL</b> CLKAAQ-DGD----       | YNQ  | AD  | P        | LE  | LN  | YD   | RE   | EN   | FM   | EA   | AA   | AC  | IN | HS  | SS     | RR    | SM    | : 594 |
| AtPERK6  | ED- <b>SLVDWARFL</b> CLNAAQ-DGD----       | YSE  | VDP | LE       | KN  | YD  | RQ   | EN   | FM   | EA   | AA   | AC   | IN  | HS | SS  | RR     | SM    | SV    | : 619 |
| AtPERK7  | ED- <b>SLVDWARFL</b> CMRVAQ-DGE----       | YGE  | VDP | LE       | KN  | YD  | RQ   | EN   | FM   | EA   | AA   | AC   | IN  | HS | SS  | RR     | SM    | SV    | : 619 |
| AtPERK8  | DE- <b>SLVDWARFL</b> GQAINEE-----         | FDE  | VDP | LE       | KN  | YD  | RQ   | EN   | FM   | EA   | AA   | AC   | IN  | HS | SS  | RR     | SM    | SV    | : 624 |
| AtPERK9  | DE- <b>SLVDWARFL</b> SHAITEE-----         | FDS  | AD  | P        | LE  | GR  | NY   | PQ   | EN   | FM   | EA   | AA   | AC  | IN | HS  | SS     | RR    | SM    | : 658 |
| AtPERK10 | DE- <b>SLVDWARFL</b> SNATEET-----         | FTA  | AD  | P        | LE  | GR  | NY   | PQ   | EN   | FM   | EA   | AA   | AC  | IN | HS  | SS     | RR    | SM    | : 712 |
| AtPERK11 | EE- <b>SLVDWARFL</b> IEAIEKGD-----        | ISE  | VDP | LE       | KN  | YD  | RQ   | EN   | FM   | EA   | AA   | AC   | IN  | HS | SS  | RR     | SM    | SV    | : 653 |
| AtPERK12 | EE- <b>SLVDWARFL</b> LKAIEETGD-----       | LSE  | AD  | P        | LE  | GR  | NY   | PQ   | EN   | FM   | EA   | AA   | AC  | IN | HS  | SS     | RR    | SM    | : 654 |
| AtPERK13 | EE- <b>SLVDWARFL</b> LKAIEETGD-----       | FSE  | VDP | LE       | KN  | YD  | RQ   | EN   | FM   | EA   | AA   | AC   | IN  | HS | SS  | RR     | SM    | SV    | : 636 |
| AtPERK14 | NQ- <b>SLVDWARFL</b> TKAISGES-----        | FDF  | VDP | LE       | KN  | YD  | RQ   | EN   | FM   | EA   | AA   | AC   | IN  | HS | SS  | RR     | SM    | SV    | : 674 |
| AtPERK15 | DD- <b>SLVDWARFL</b> IQAINDGN----         | FDG  | VDP | LE       | KN  | YD  | RQ   | EN   | FM   | EA   | AA   | AC   | IN  | HS | SS  | RR     | SM    | SV    | : 427 |
| OsPERK1  | DD- <b>SLVDWARFL</b> MRAADDGN----         | YDA  | VDP | LE       | KN  | YD  | RQ   | EN   | FM   | EA   | AA   | AC   | IN  | HS | SS  | RR     | SM    | SV    | : 506 |
| OsPERK2  | DS- <b>SLVDWARFL</b> SEATEEGN----         | FDI  | VDP | LE       | KN  | YD  | RQ   | EN   | FM   | EA   | AA   | AC   | IN  | HS | SS  | RR     | SM    | SV    | : 510 |
| OsPERK3  | DS- <b>SLVDWARFL</b> SEAMEEGN----         | FDI  | VDP | LE       | KN  | YD  | RQ   | EN   | FM   | EA   | AA   | AC   | IN  | HS | SS  | RR     | SM    | SV    | : 486 |
| OsPERK4  | DD- <b>SLVDWARFL</b> ARALADG----          | DYGG | AD  | P        | LE  | GR  | NY   | PQ   | EN   | FM   | EA   | AA   | AC  | IN | HS  | SS     | RR    | SM    | : 485 |
| OsPERK5  | DE- <b>SLVDWARFL</b> TQAIETGN----         | LEE  | VDP | LE       | KN  | YD  | RQ   | EN   | FM   | EA   | AA   | AC   | IN  | HS | SS  | RR     | SM    | SV    | : 350 |
| OsPERK6  | EE- <b>SLVDWARFL</b> ADAVETGD----         | LSE  | AD  | P        | LE  | GR  | NY   | PQ   | EN   | FM   | EA   | AA   | AC  | IN | HS  | SS     | RR    | SM    | : 692 |
| OsPERK7  | AD- <b>SLVDWARFL</b> PRMAAGGG--GGYDD      | VDP  | LE  | KN       | YD  | RQ  | EN   | FM   | EA   | AA   | AC   | IN   | HS  | SS | RR  | SM     | SV    | : 439 |       |
| OsPERK8  | ED- <b>SLVDWARFL</b> ARLVAGGEEGLIRE       | VDS  | AD  | P        | LE  | GR  | NY   | PQ   | EN   | FM   | EA   | AA   | AC  | IN | HS  | SS     | RR    | SM    | : 519 |
| GmPERK1  | DE- <b>SLVDWARFL</b> SHALDTEE-----        | FDS  | AD  | P        | LE  | GR  | NY   | PQ   | EN   | FM   | EA   | AA   | AC  | IN | HS  | SS     | RR    | SM    | : 680 |
| GmPERK2  | DD- <b>SLVDWARFL</b> TRGLEEDGN----        | FGE  | VDP | LE       | KN  | YD  | RQ   | EN   | FM   | EA   | AA   | AC   | IN  | HS | SS  | RR     | SM    | SV    | : 574 |
| GmPERK3  | ED- <b>SLVDWARFL</b> NKGLD-DGN----        | FGE  | VDP | LE       | KN  | YD  | RQ   | EN   | FM   | EA   | AA   | AC   | IN  | HS | SS  | RR     | SM    | SV    | : 547 |
| GmPERK4  | DE- <b>SLVDWARFL</b> SHALDTEE-----        | FDS  | AD  | P        | LE  | GR  | NY   | PQ   | EN   | FM   | EA   | AA   | AC  | IN | HS  | SS     | RR    | SM    | : 695 |
| GmPERK5  | ED- <b>SLVDWARFL</b> CTKAME-NGT----       | FE   | G   | V        | D   | P   | LE   | KN   | YD   | RQ   | EN   | FM   | EA  | AA | AC  | IN     | HS    | SS    | : 565 |
| GmPERK6  | NE- <b>SLVDWARFL</b> AQALQDGD----         | FDN  | VDP | LE       | KN  | YD  | RQ   | EN   | FM   | EA   | AA   | AC   | IN  | HS | SS  | RR     | SM    | SV    | : 540 |
| GmPERK7  | NE- <b>SLVDWARFL</b> AQALQDGD----         | FDN  | VDP | LE       | KN  | YD  | RQ   | EN   | FM   | EA   | AA   | AC   | IN  | HS | SS  | RR     | SM    | SV    | : 600 |
| GmPERK8  | ED- <b>SLVDWARFL</b> TRALEEDD----         | FDS  | AD  | P        | LE  | GR  | NY   | PQ   | EN   | FM   | EA   | AA   | AC  | IN | HS  | SS     | RR    | SM    | : 582 |
| GmPERK9  | DE- <b>SLVDWARFL</b> TEALDNE-----         | FEI  | VDP | LE       | KN  | YD  | RQ   | EN   | FM   | EA   | AA   | AC   | IN  | HS | SS  | RR     | SM    | SV    | : 659 |
| GmPERK10 | DE- <b>SLVDWARFL</b> LRAIETRD-----        | FSD  | AD  | P        | LE  | GR  | NY   | PQ   | EN   | FM   | EA   | AA   | AC  | IN | HS  | SS     | RR    | SM    | : 632 |
| GmPERK11 | ED- <b>SLVDWARFL</b> TRALEEDD----         | FDS  | AD  | P        | LE  | GR  | NY   | PQ   | EN   | FM   | EA   | AA   | AC  | IN | HS  | SS     | RR    | SM    | : 575 |
| GmPERK12 | DD- <b>SLVDWARFL</b> TRGLEEDGN----        | FGE  | VDP | LE       | KN  | YD  | RQ   | EN   | FM   | EA   | AA   | AC   | IN  | HS | SS  | RR     | SM    | SV    | : 572 |
| GmPERK13 | EE- <b>SLVDWARFL</b> TDALDSEE-----        | FES  | AD  | P        | LE  | GR  | NY   | PQ   | EN   | FM   | EA   | AA   | AC  | IN | HS  | SS     | RR    | SM    | : 495 |
| GmPERK14 | DE- <b>SLVDWARFL</b> NKGLD-DGN----        | FRE  | VDP | LE       | KN  | YD  | RQ   | EN   | FM   | EA   | AA   | AC   | IN  | HS | SS  | RR     | SM    | SV    | : 538 |
| GmPERK15 | DE- <b>SLVDWARFL</b> LRAIETRD-----        | FSD  | AD  | P        | LE  | GR  | NY   | PQ   | EN   | FM   | EA   | AA   | AC  | IN | HS  | SS     | RR    | SM    | : 540 |
| GmPERK16 | DE- <b>SLVDWARFL</b> TEALDNE-----         | FEI  | VDP | LE       | KN  | YD  | RQ   | EN   | FM   | EA   | AA   |      |     |    |     |        |       |       |       |



|          | * | 1040       | *                                              | 1060                       | *                       | 1080   | * | 1100 |  |
|----------|---|------------|------------------------------------------------|----------------------------|-------------------------|--------|---|------|--|
| TaPERK1  | : | -EGVRP---- | GHSRFFGSYS--SSDYDSGGQYNEDMKKKFK--MAFTTNDY----- | T                          | SQYSAPTS---EYGQIPS-     | : 625  |   |      |  |
| TaPERK2  | : | -EGVRP---- | GHSRFFGSYS--SSDYDSGGQYNEDMKKKFK--MAFTTNDY----- | T                          | SQYSAPTS---EYGQIPS-     | : 443  |   |      |  |
| TaPERK3  | : | -NGVQP---- | GQSELEN-----VANTADIRMFQQMVQNQDD-----           | D                          | SAFSQYS---WISRSRAD-     | : 645  |   |      |  |
| TaPERK4  | : | -EGVRP---- | GHSRFFGSYS--SSDYDSGGQYNEDMKKKFK--MAFTTNDY----- | T                          | SQYSAPTS---EYGQIPS-     | : 620  |   |      |  |
| TaPERK5  | : | -DVVTK---- | PSYITEWQITGG-NTTYMT-----                       | DV                         | GQSSAPRPNSPSSRTSSP-     | : 1005 |   |      |  |
| TaPERK6  | : | -DVVTK---- | PSYITEWQIKGG-NTTYMST-----                      | DV                         | GQSSAPRPNSSTSQTTSP-     | : 1003 |   |      |  |
| TaPERK7  | : | GEEVIK---- | PSYITEWQVKGSSSYTGTSQAGLSSSSTTQQS               | ---                        | GGGHAAGGDATPATGNPSP-    | : 1042 |   |      |  |
| TaPERK8  | : | -DVVTK---- | PSYITEWQITGG-NTTYMT-----                       | DV                         | GQSSAPRPNSPSSRTSSP-     | : 1004 |   |      |  |
| TaPERK9  | : | -DVVTK---- | PSYITEWQIKGG-NTTYMST-----                      | DV                         | GQSSAPRPNSSTSQTTSP-     | : 1005 |   |      |  |
| TaPERK10 | : | -DVVTK---- | PSYITEWQITGG-NTTYMST-----                      | DV                         | GQSSAPRPNSSTSSRTSSP-    | : 1006 |   |      |  |
| TaPERK11 | : | -DVVTK---- | PSYITEWQIKGG-NTSYMST-----                      | DV                         | GQSSAPRPNSSTSQTTSP-     | : 914  |   |      |  |
| TaPERK12 | : | GEEVIK---- | PSYITEWQVKGSSSYTGTSQAGLSSSSTTQQS               | ---                        | GGGHAAGGDATPATGNPSP-    | : 104  |   |      |  |
| TaPERK13 | : | -NGVQP---- | GMSEMEN-----                                   | AFNTAEIRLFQRMAFGSQDF-      | TDFIQSSS---WNSSRQGG-    | : 672  |   |      |  |
| TaPERK14 | : | -EGVRP---- | GHSRFMGSHA--SSEYDTSQYNEDLKRRK--MALGTSSF-----   | Q                          | SQLPIDSGGEHEQHNPSP-     | : 597  |   |      |  |
| TaPERK15 | : | -NGVKL---- | GHSTAYDS-----                                  | GQYSADIELFRMGFEADLDT       | AEYGLSDGGVLPGNMSGQLLD-  | : 694  |   |      |  |
| TaPERK16 | : | -NGIQP---- | GRSEVEL-----                                   | EPRTEEIRLFQLREFGSRE-C      | DELSQLAS---WRSRDL-      | : 675  |   |      |  |
| TaPERK17 | : | -GGMAP---- | GQSAMHRSGGG--NTDEVRLLRMAFGPGTG--TAGGTISEY----- | A                          | SEMSAPTS---EYGLNPS-     | : 672  |   |      |  |
| TaPERK18 | : | -NGVQP---- | GMSEMEN-----                                   | AFNTAEIRLFQRMAFGSQDF-      | TDFIQSSS---WNSSRQGG-    | : 672  |   |      |  |
| TaPERK19 | : | -EGVRP---- | GHSRFMGSHA--SSEYDTSQYNEDLKRRK--MALGTSSF-----   | Q                          | SQLPSSD--EHERRQDPS-     | : 599  |   |      |  |
| TaPERK20 | : | -NGVKL---- | GHSTAYDS-----                                  | GQYSADIELFRMGFEADLDT       | AEYGLSDQDELPPGSGRQQR-   | : 693  |   |      |  |
| TaPERK21 | : | -NGIQP---- | GRSEVEL-----                                   | EPRTEEIRLFQLREFGSRE-C      | DELSQLAS---WRSRDL-      | : 677  |   |      |  |
| TaPERK22 | : | -GGMAP---- | GQSAMHRSGGG--NTDEVRLLRMAFGPGTG--TAGGTISEY----- | A                          | SEMSAPTS---EYGLNPS-     | : 756  |   |      |  |
| TaPERK23 | : | -NGVQP---- | GMSEMEN-----                                   | AFNTAEIRLFQRMAFGSQDF-      | TDFIQSSS---WNSSRQGG-    | : 386  |   |      |  |
| TaPERK24 | : | -EGVRP---- | GHSRFMGSHA--SSEYDTSQYNEDLKRRK--MALGTSSF-----   | Q                          | SQLPSSG--EHEHQEPS-      | : 600  |   |      |  |
| TaPERK25 | : | -NGIQP---- | GRSEVEL-----                                   | EPRTEEIRLFQLREFGSRE-C      | DELSQLAS---WRSRDL-      | : 676  |   |      |  |
| TaPERK26 | : | -GGMAP---- | GQSAMHRSGGG--NTDEVRLLRMAFGPGTG--TAGGTISEY----- | A                          | SEMSARTS---EYGLNPS-     | : 683  |   |      |  |
| TaPERK27 | : | -EGMKP---- | GQSMIYS-----                                   | SDESGSYAANIRNLRVAFESS-GEY  | NEYS-----GTGESG-        | : 314  |   |      |  |
| TaPERK28 | : | -DWVPK---- | PSYITEWHIKGGDTSYMSS-----                       | EVNGQSSVFP-----            | AP                      | : 857  |   |      |  |
| TaPERK29 | : | -EGMKP---- | GQSMIYS-----                                   | SDESGSYAANIRNLRVAFESS-EYY  | NEYS-----GTGESG-        | : 611  |   |      |  |
| TaPERK30 | : | -DGVRP---- | GQSRLEF-----                                   | EEAGSCSSDNRLTKVVVV--ASPEY  | GRFGRPSFV--SSDRPIDSD-   | : 561  |   |      |  |
| TaPERK31 | : | -DGVRP---- | GQSRLEG-----                                   | EEAGSYSSDNRAKEVAV--ASPEY   | GRSGRPSFV--SSDRPIDSD-   | : 601  |   |      |  |
| TaPERK32 | : | -DWVPK---- | PSYITEWQIKGGDTSYMSS-----                       | EVNGQSSSEP-----            | AP                      | : 999  |   |      |  |
| TaPERK33 | : | -NGVQP---- | GKSQMEN-----                                   | AANTADIRQFQRMAFGSQDFS      | SEYQSKA---SLSGRRDL-     | : 728  |   |      |  |
| TaPERK34 | : | -NGVQP---- | GKSQMEN-----                                   | AANTADIRQFQRMAFGSQEFT      | SEYAQSKA---SLSGRRDL-    | : 735  |   |      |  |
| TaPERK35 | : | -DWVPK---- | PSYITEWQIKGGDTSYMSS-----                       | EVNGQSSSEP-----            | AP                      | : 996  |   |      |  |
| TaPERK36 | : | -NGVKV---- | GQSQVENN-----                                  | SQQAALQLRTPSPPPRSSRGSS     | SSRPGSSS---RPGSTVP-     | : 747  |   |      |  |
| TaPERK37 | : | -NGVQP---- | GKSQMEN-----                                   | AANTADIRQFQRMAFGSQDFS      | SEYQSKA---SLSGRRDL-     | : 734  |   |      |  |
| AtPERK1  | : | -EGMRP---- | GHSNVYSSYGG--STDYDTSQYNDDMKRRK--MALGTQEYG----- | T                          | GEYSNPTS---DYGLYPS-     | : 623  |   |      |  |
| AtPERK2  | : | -QGITP---- | GHSNVYSSGGG--STDYDSSQDNEMKNKERK--VGL-----E     | H                          | TQDLYNPIS--EYDLYPS-     | : 693  |   |      |  |
| AtPERK3  | : | -QGITP---- | GHSNVYSSXRG--STYYDTRTMXYTRKRI--KMG-----H       | H                          | GKGEYSNPTS---DYRLYPG-   | : 522  |   |      |  |
| AtPERK4  | : | -EGMRP---- | GHSNVYSSL--GASSDYSQTSYNADMKKERQIALS            | ---                        | QEFFVSDCB--GTSNDSR-     | : 622  |   |      |  |
| AtPERK5  | : | -EGTRP---- | GQSTYLSFG--SVSEYDASSYTADMKKKKLALENKEY-Q        | ---                        | SEYGGTSEYGLNPSASSSE-    | : 657  |   |      |  |
| AtPERK6  | : | -EGGKA---- | GQSSFLGRG--SSS-DYDSSTYSADMKKRKVALDSHEYGA       | ---                        | SEYGNTSEYGLDPSSSSSE-    | : 682  |   |      |  |
| AtPERK7  | : | -DGVRP---- | KQSSSGGEG--SS--DYEMGTGYAEMKKERKVTLERSDYGA      | ---                        | SEYGATSEYGLDPSSSSSE-    | : 681  |   |      |  |
| AtPERK8  | : | -NGVRP---- | GQSQVEDS-----                                  | RQQAQIRMERQMAFGSQDYS       | DDFDRSQSHSSWGSRDQ--     | : 676  |   |      |  |
| AtPERK9  | : | -NGVRL---- | GESEVFNS-----                                  | AQQAQAEIRLERMAFGSQNYS      | DDFSHSS---YNSRDANV-     | : 708  |   |      |  |
| AtPERK10 | : | -NGVRL---- | GESEIINS-----                                  | AQQAQAEIRLERMAFGSQNYS      | DSLTRNS---YISKDENL-     | : 762  |   |      |  |
| AtPERK11 | : | -NGVKV---- | GQSRVYDS-----                                  | GQYSNEIRIERRAS-----EDSSDLG | TN GYPSQ---DYATS        | : 701  |   |      |  |
| AtPERK12 | : | -NGVKI---- | GQSTTYDS-----                                  | GQYNEDIMKKERMAFGGDNSVESG   | LY GNYSAK-----SSSDF     | : 705  |   |      |  |
| AtPERK13 | : | -NGNKV---- | GQSSAYS-----                                   | GQYNNDIMKKERMAFGFDDSSDSG   | MY GDYVQDSRKSGSNAGASSEF | : 695  |   |      |  |
| AtPERK14 | : | -EETGN---- | S---VTYSSSE--NENDITP-----RYGTNKRREDTG          | ---                        | GDY---TS---EYGVNPS-     | : 720  |   |      |  |
| AtPERK15 | : | -EGAAP---- | GQSTIYSLDG--SSDYSSSTQYKEDMKKKFK--MAFESKTF----- | G                          | SECGLTS---DNGQNPS-      | : 48   |   |      |  |



|          | * | 1120                                                     | * | 1140 | * | 1160 |      |
|----------|---|----------------------------------------------------------|---|------|---|------|------|
| TaPERK1  | : | -ASSSEG--QQTQ-EIETGTMKKGGHSG--YSSGYSGPS-----             |   |      |   |      | 658  |
| TaPERK2  | : | -ASSSEG--QQTQ-EIETGTMKKGGHSG--YSSGYSGPS-----             |   |      |   |      | 476  |
| TaPERK3  | : | AEATSSNSRIL-----                                         |   |      |   |      | 656  |
| TaPERK4  | : | -ASSSEG--QQTQ-EIETGTMKKGGHSG--YSSGYSGPS-----             |   |      |   |      | 653  |
| TaPERK5  | : | FLSSVIDEGR-----                                          |   |      |   |      | 1015 |
| TaPERK6  | : | FLSSVIDEGR-----                                          |   |      |   |      | 1013 |
| TaPERK7  | : | MFTSIIDEGR-----                                          |   |      |   |      | 1052 |
| TaPERK8  | : | FLSSVMDEGR-----                                          |   |      |   |      | 1014 |
| TaPERK9  | : | FLSSVIDEGR-----                                          |   |      |   |      | 1015 |
| TaPERK10 | : | FLSSVIDEGR-----                                          |   |      |   |      | 1016 |
| TaPERK11 | : | FLSSVIDEGR-----                                          |   |      |   |      | 924  |
| TaPERK12 | : | IFTSIIDEGR-----                                          |   |      |   |      | 1051 |
| TaPERK13 | : | -DADASGGFMHSQQLQP-----                                   |   |      |   |      | 687  |
| TaPERK14 | : | -VPSSDGH-QQTQ-EVELGTSTKRDDGD--VESQASMR-----              |   |      |   |      | 630  |
| TaPERK15 | : | GEAHQINQLGSPAGRLNPPATLHRTF-----                          |   |      |   |      | 720  |
| TaPERK16 | : | -----                                                    |   |      |   |      | -    |
| TaPERK17 | : | -SEYTASSAADTEDMTDFPHRAGAGRGSAGGSGEAGRGTTEGFSRRTTVRRTRGRG |   |      |   |      | 727  |
| TaPERK18 | : | GDVDASGGPRQSQP-----                                      |   |      |   |      | 686  |
| TaPERK19 | : | -VQSSDGH-RQTQ-EVELGTT-KRDDGD--VESQTSMR-----              |   |      |   |      | 631  |
| TaPERK20 | : | -----TAAGR-----                                          |   |      |   |      | 698  |
| TaPERK21 | : | -----                                                    |   |      |   |      | -    |
| TaPERK22 | : | -SEYTASSAADTEDMTDFPHRAGTGRGAAGASGEAGRGTTEGFSRRTTGRRTSRG  |   |      |   |      | 811  |
| TaPERK23 | : | -DVDASGGPRHPQSQP-----                                    |   |      |   |      | 401  |
| TaPERK24 | : | -VPSSDGH-QQTQ-EVELGTR-KRDDGD--VESQASMR-----              |   |      |   |      | 632  |
| TaPERK25 | : | -----                                                    |   |      |   |      | -    |
| TaPERK26 | : | -SEYTASSAADTEDMTDFPHRAGTGRGAAGVSGEAGRGTTEGFSRRTTVRRTRGRG |   |      |   |      | 438  |
| TaPERK27 | : | ETTQRHH-----                                             |   |      |   |      | 621  |
| TaPERK28 | : | FLGSVIDQGR-----                                          |   |      |   |      | 867  |
| TaPERK29 | : | ETTQRHH-----                                             |   |      |   |      | 618  |
| TaPERK30 | : | EMSPAERQQPHL-----                                        |   |      |   |      | 573  |
| TaPERK31 | : | EMSPAERQPPHL-----                                        |   |      |   |      | 613  |
| TaPERK32 | : | FLGSVIDQGR-----                                          |   |      |   |      | 1009 |
| TaPERK33 | : | -----                                                    |   |      |   |      | -    |
| TaPERK34 | : | -----                                                    |   |      |   |      | -    |
| TaPERK35 | : | FLGSVIDQGR-----                                          |   |      |   |      | 1006 |
| TaPERK36 | : | PFVL-----                                                |   |      |   |      | 751  |
| TaPERK37 | : | -----                                                    |   |      |   |      | -    |
| AtPERK1  | : | -GSSSEGGQ-ATREM--EMGKIKKTGGQY---SGPSL-----               |   |      |   |      | 652  |
| AtPERK2  | : | -WSSDGGQ-TTQ GK--ATGNIKRPGQGY---G-----                   |   |      |   |      | 717  |
| AtPERK3  | : | GRSSSEGQ-ATRGNGFEMGKIKRTAQRY---GGDSL-----                |   |      |   |      | 554  |
| AtPERK4  | : | DMGTKSPTPPK-----                                         |   |      |   |      | 633  |
| AtPERK5  | : | EMNRGSMKRNQPL-----                                       |   |      |   |      | 670  |
| AtPERK6  | : | EIRRGGANNNKTPSRDH-----                                   |   |      |   |      | 700  |
| AtPERK7  | : | EMHIGGSTSKTTTNRGI-----                                   |   |      |   |      | 699  |
| AtPERK8  | : | -SREVP-----                                              |   |      |   |      | 681  |
| AtPERK9  | : | -----                                                    |   |      |   |      | -    |
| AtPERK10 | : | -----                                                    |   |      |   |      | -    |
| AtPERK11 | : | HEYESERAFNTSHRNH-----                                    |   |      |   |      | 718  |
| AtPERK12 | : | SGNESETRPFNNRRF-----                                     |   |      |   |      | 720  |
| AtPERK13 | : | TRNETENRNFNRRY-----                                      |   |      |   |      | 710  |
| AtPERK14 | : | -QSSSEHQVNT-----                                         |   |      |   |      | 731  |
| AtPERK15 | : | -GSSSITEGQRTTQEIPEKNTKDT-----                            |   |      |   |      | 509  |
| OsPERK1  | : | -VSMGDAR-QIPETEMEMGSLKKDGDSNGTRDSQAS-----                |   |      |   |      | 597  |
| OsPERK2  | : | NRSFAKGR-----                                            |   |      |   |      | 568  |
| OsPERK3  | : | TKQFNYYR-----                                            |   |      |   |      | 520  |
| OsPERK4  | : | EMSAEWKQPPHRVSR-----                                     |   |      |   |      | 555  |
| OsPERK5  | : | -----                                                    |   |      |   |      | -    |
| OsPERK6  | : | E-----                                                   |   |      |   |      | 748  |
| OsPERK7  | : | NASSGEHDNQWRKAHR-----                                    |   |      |   |      | 517  |
| OsPERK8  | : | HSSRLPPKR-----                                           |   |      |   |      | 568  |
| GmPERK1  | : | -----                                                    |   |      |   |      | -    |
| GmPERK2  | : | EVSQKQQL-----                                            |   |      |   |      | 634  |
| GmPERK3  | : | ELSSKEMGYH-----                                          |   |      |   |      | 608  |
| GmPERK4  | : | -----                                                    |   |      |   |      | -    |
| GmPERK5  | : | QSSAEYARRTTGGGRMHTP-----                                 |   |      |   |      | 645  |
| GmPERK6  | : | -----                                                    |   |      |   |      | -    |
| GmPERK7  | : | -GSSSEAQQSFRDIV-----                                     |   |      |   |      | 673  |
| GmPERK8  | : | -GSSSEAQSRQTTREMEMRKMNSQGFS-----GSS-----                 |   |      |   |      | 671  |
| GmPERK9  | : | NTMFSQKGTGFWNV-----                                      |   |      |   |      | 724  |
| GmPERK10 | : | LIRHSSSGSLNLELSTCIGVVLNENRD-----                         |   |      |   |      | 718  |
| GmPERK11 | : | -GSSSEAQSRQTTREMEMRKMNNQGFS-----GSS-----                 |   |      |   |      | 664  |
| GmPERK12 | : | EVSQKQQL-----                                            |   |      |   |      | 632  |
| GmPERK13 | : | -----                                                    |   |      |   |      | -    |
| GmPERK14 | : | ELSSKEMSYH-----                                          |   |      |   |      | 599  |
| GmPERK15 | : | LIQHSSSGEFDSRDINMHRSSIE-----                             |   |      |   |      | 622  |
| GmPERK16 | : | TTVFSQNKTGHNV-----                                       |   |      |   |      | 756  |

**B**

**TaPERK1**

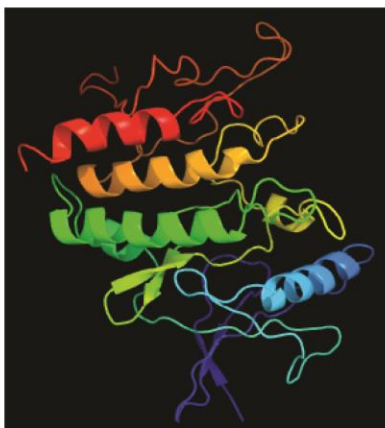

**TaPERK2**

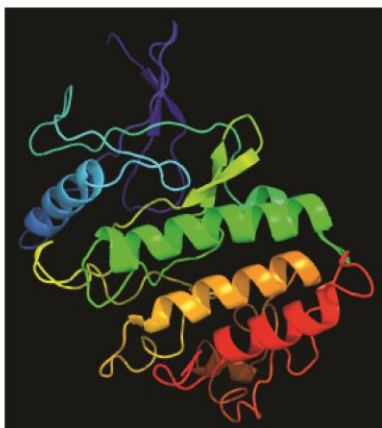

**TaPERK3**

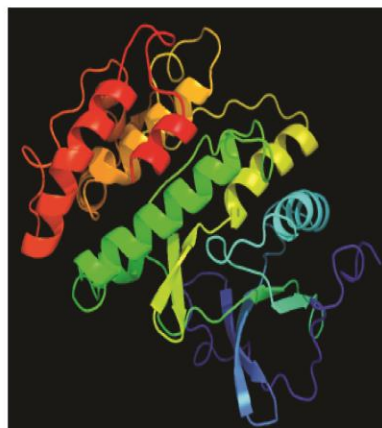

**TaPERK4**

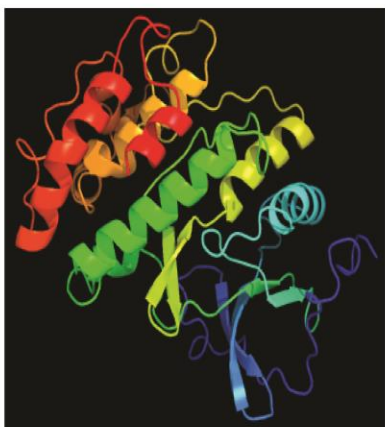

**TaPERK5**

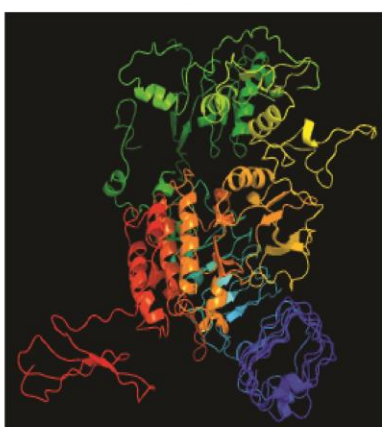

**TaPERK6**

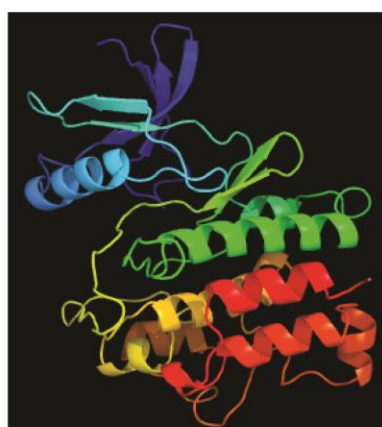

**TaPERK7**

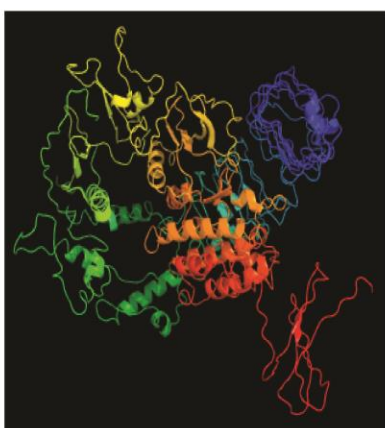

**TaPERK8**

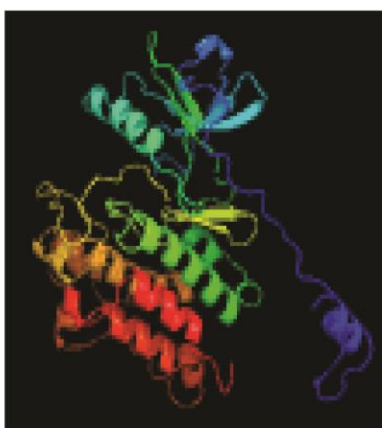

**TaPERK9**

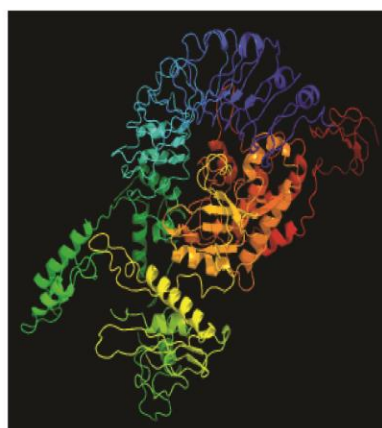



**TaPERK10**

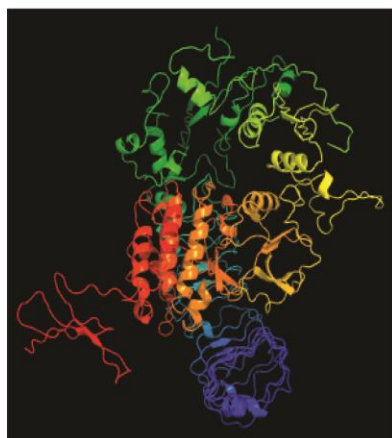

**TaPERK11**

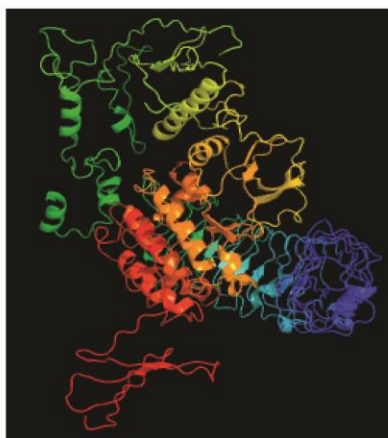

**TaPERK12**

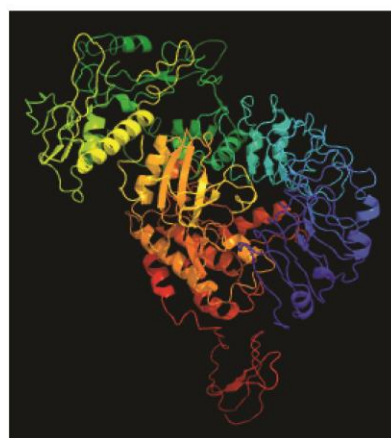

**TaPERK13**

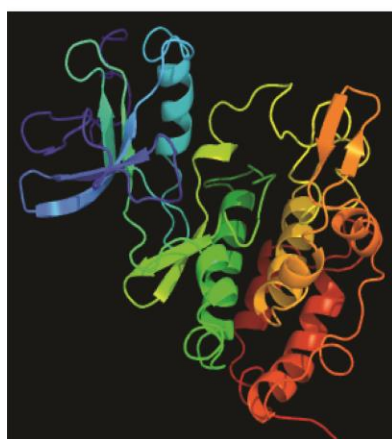

**TaPERK14**

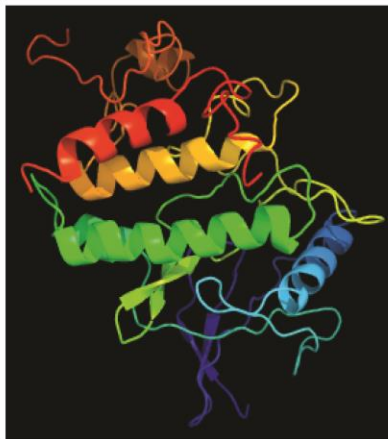

**TaPERK15**

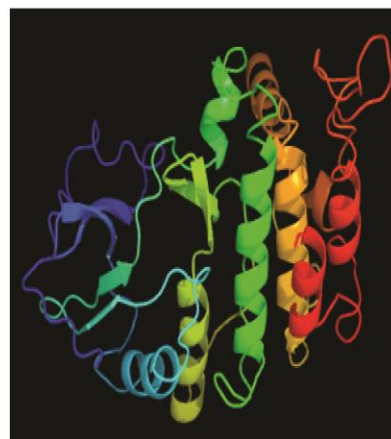

**TaPERK16**

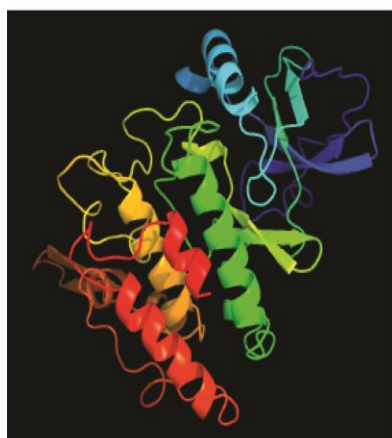

**TaPERK17**

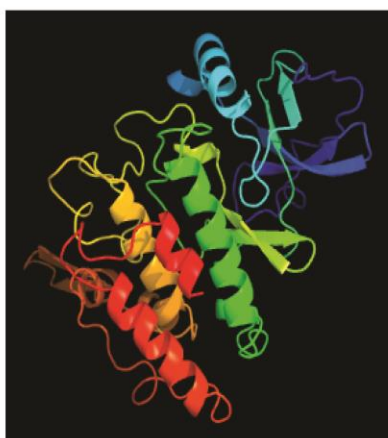

**TaPERK18**

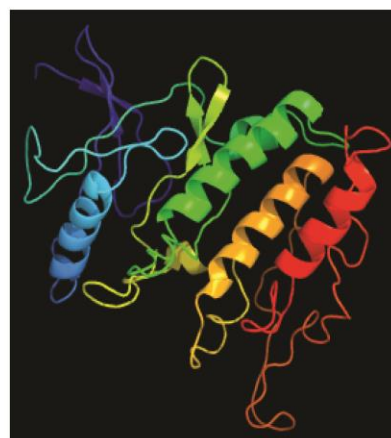

**TaPERK19**

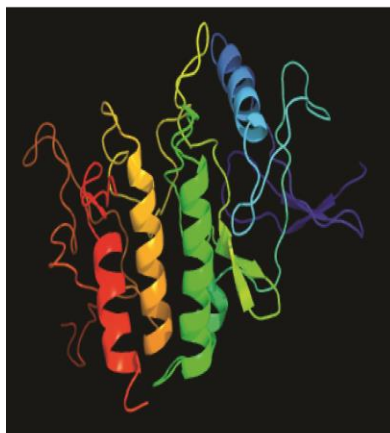

**TaPERK20**

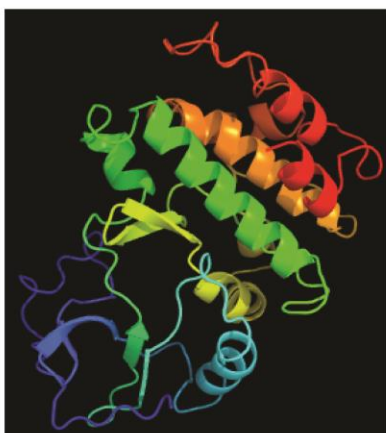

**TaPERK21**

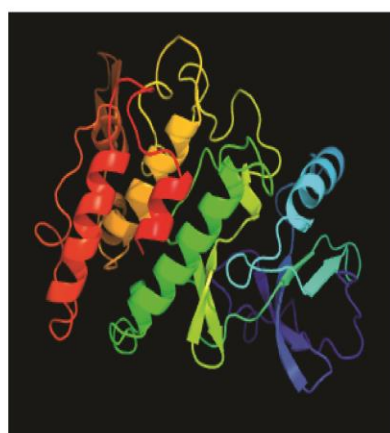

**TaPERK22**

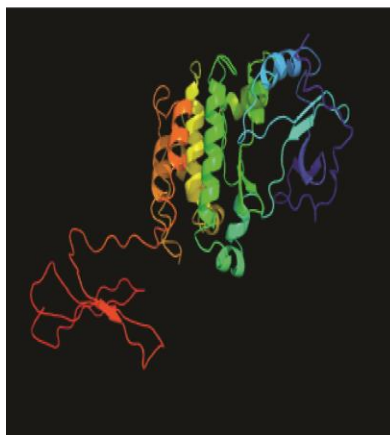

**TaPERK23**

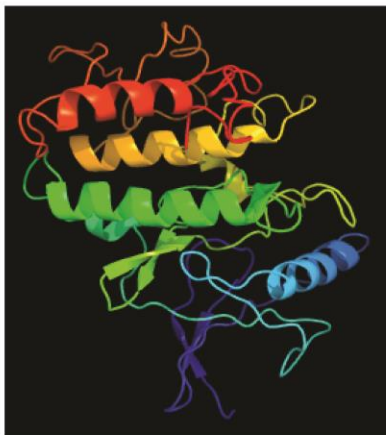

**TaPERK24**

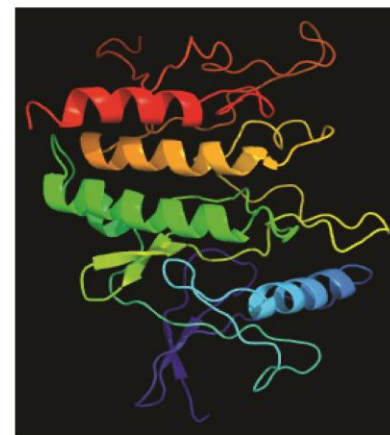

**TaPERK25**

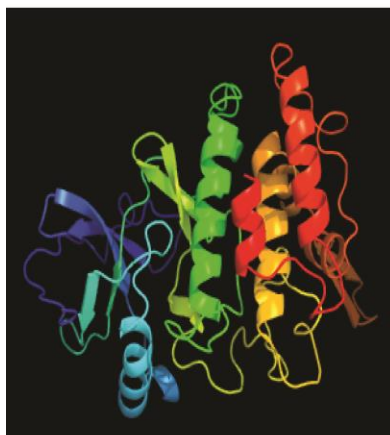

**TaPERK26**

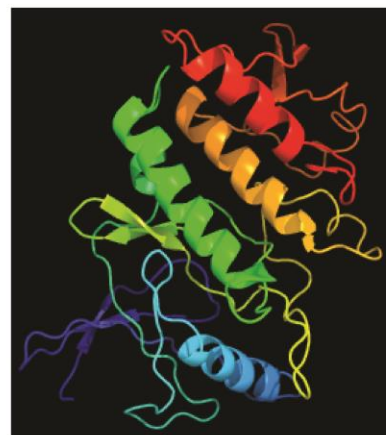

**TaPERK27**

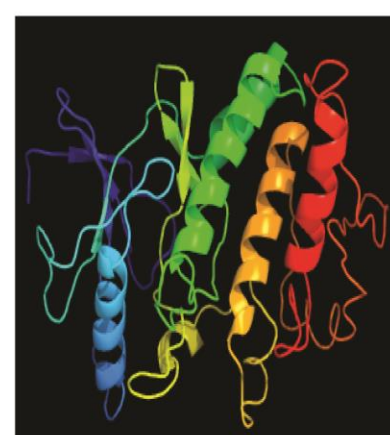

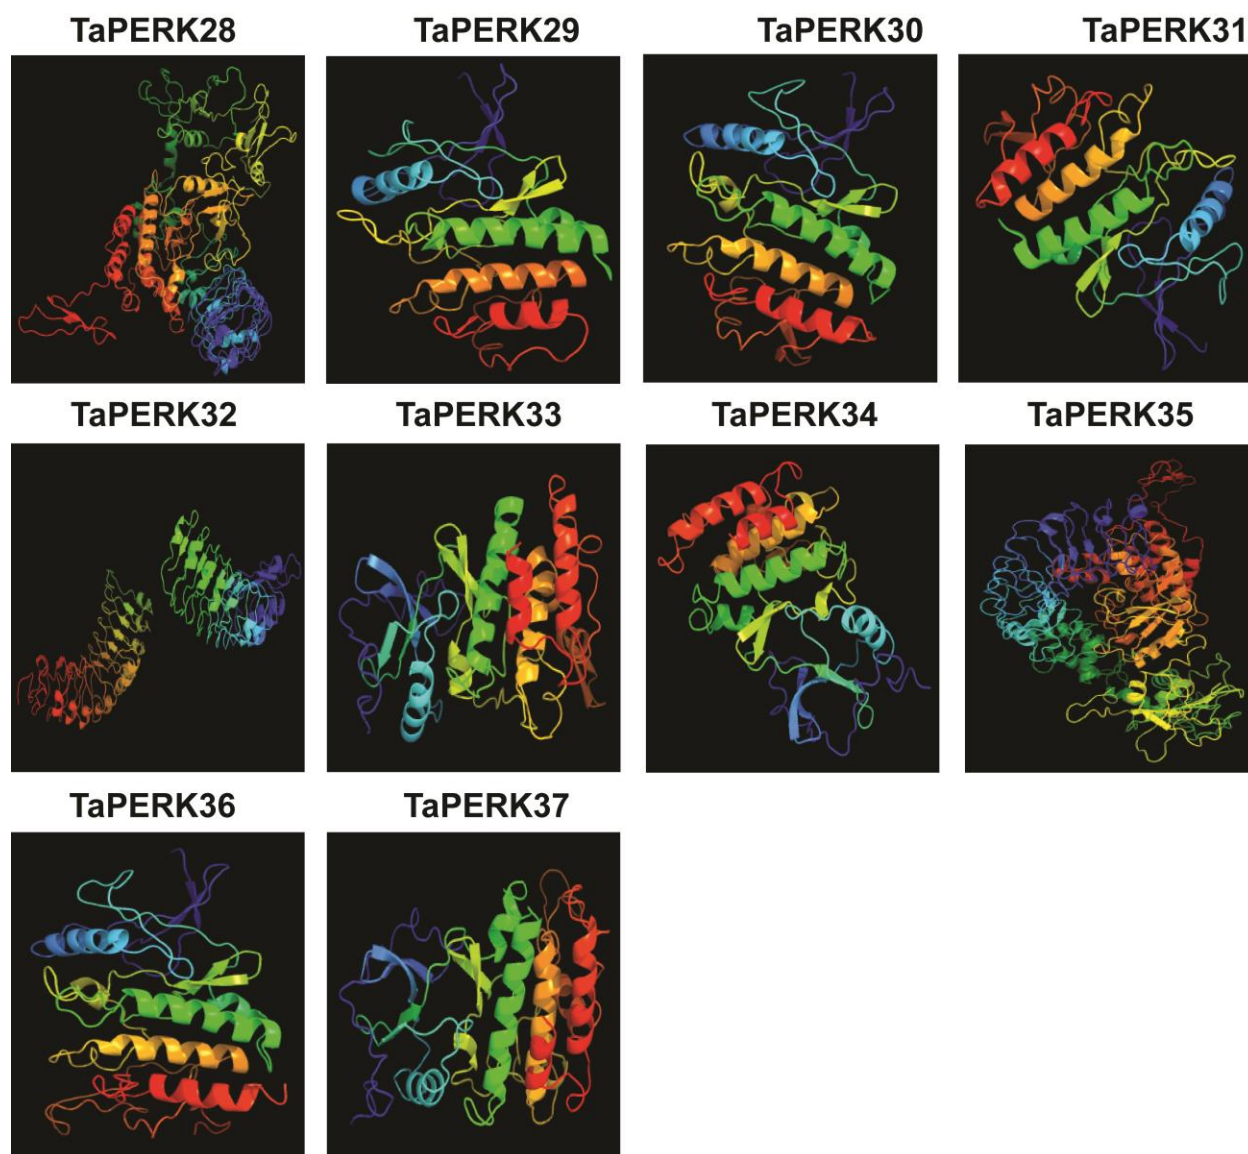

Figure S6. Alignment and 3-dimensional structure of the TaPERK protein sequences. **A.** The conserved protein tyrosine kinase domain is boxed with red color. Colored and shaded amino acids are chemically similar residues. Dashes indicate gaps introduced to maximize the alignment of the homologous region. **B.** Predicted 3D structures TaPERK proteins.



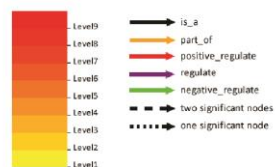

**B**

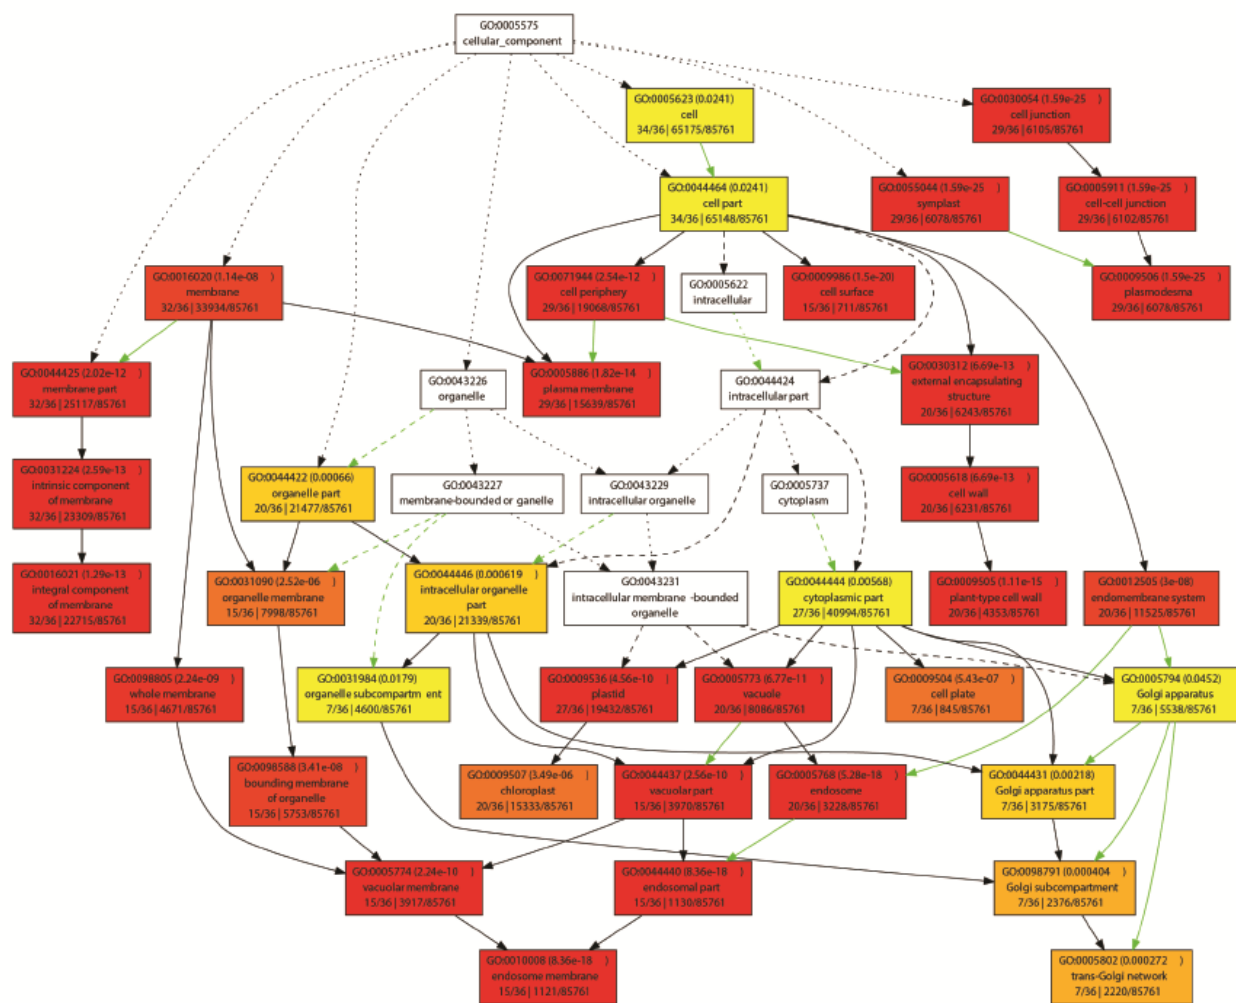

**C**

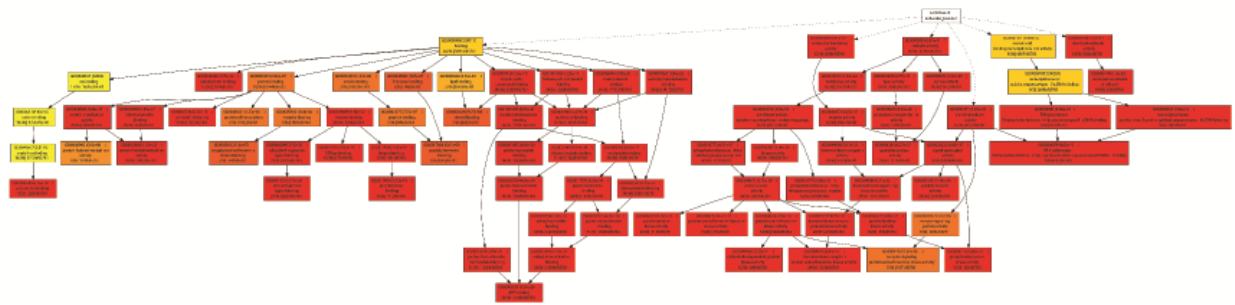

Figure S7. Gene ontology term distribution TaPERK gene family predicted using AgriGO **A.** Biological Process. **B.** Cellular component. **C.** Molecular function.

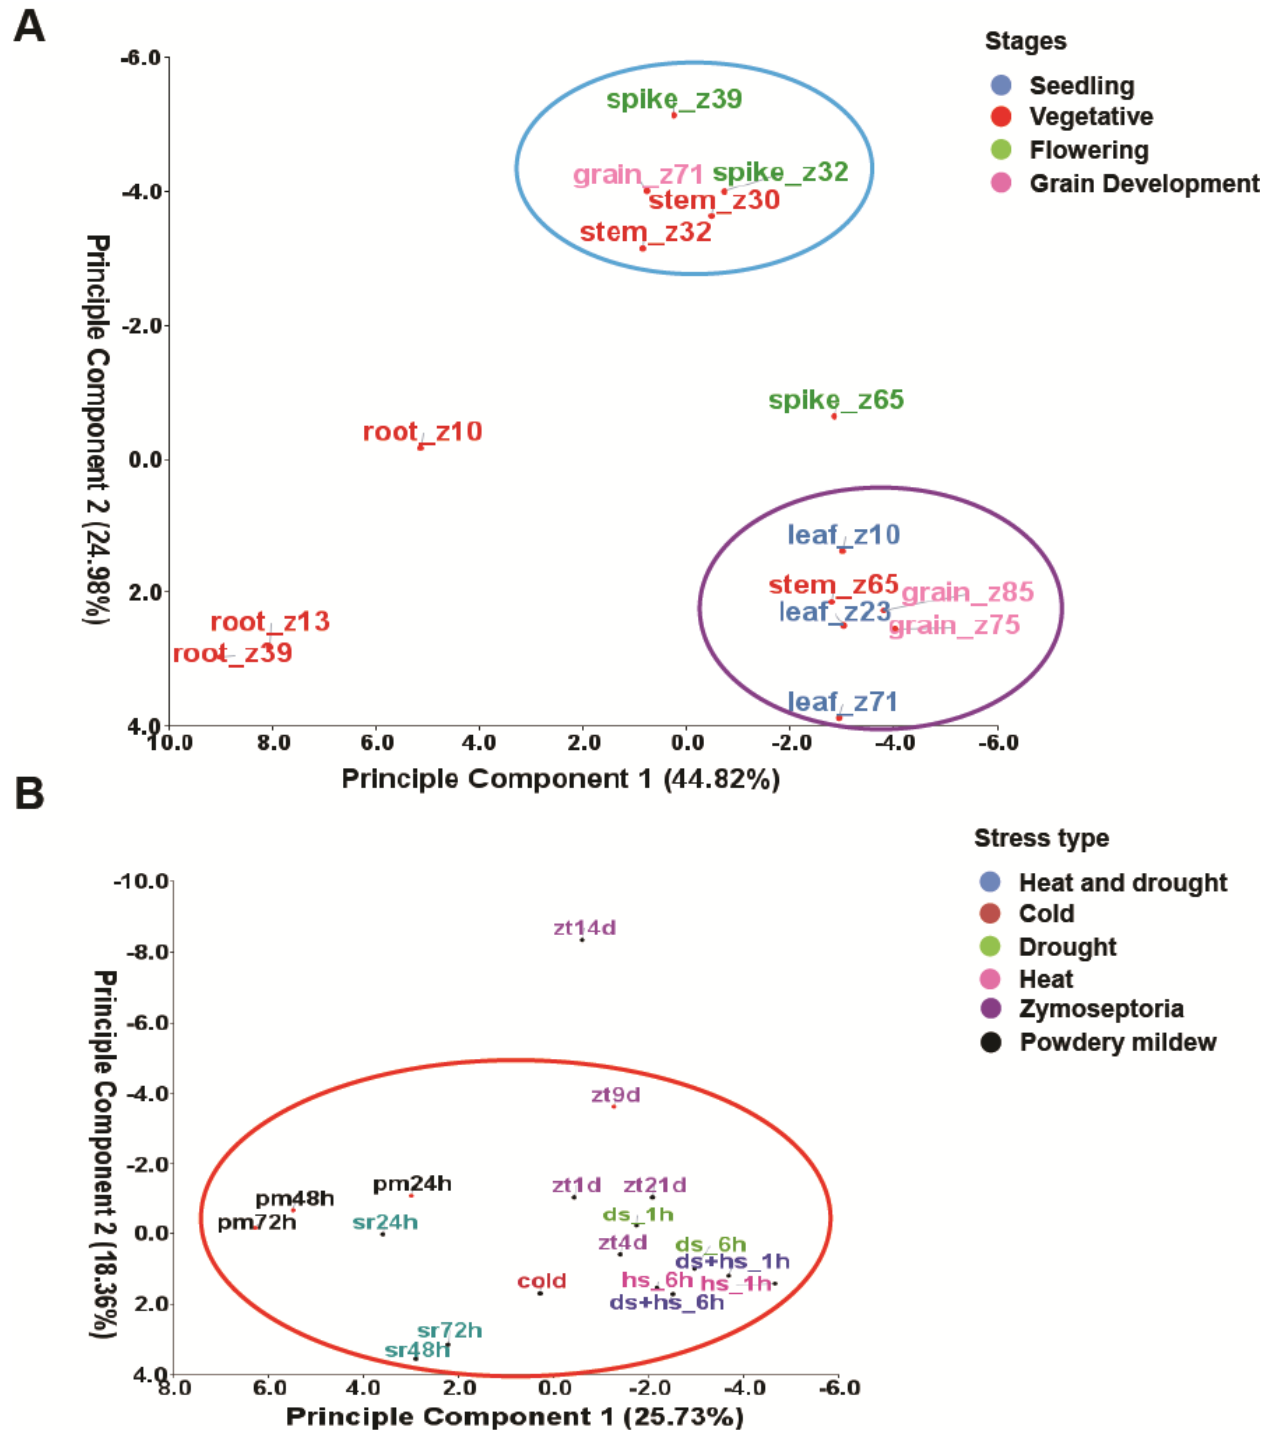

Figure S8. PCA plots displaying grouping of different (A) Developmental stages (B) Biotic and abiotic stress conditions based on the TaPERK expression pattern. DS: Drought stress, HS: Heat stress, Zt: *Zymoseptoria tritici*, PM: Powdery mildew; SR: Stripe rust, h: hour and d: days.

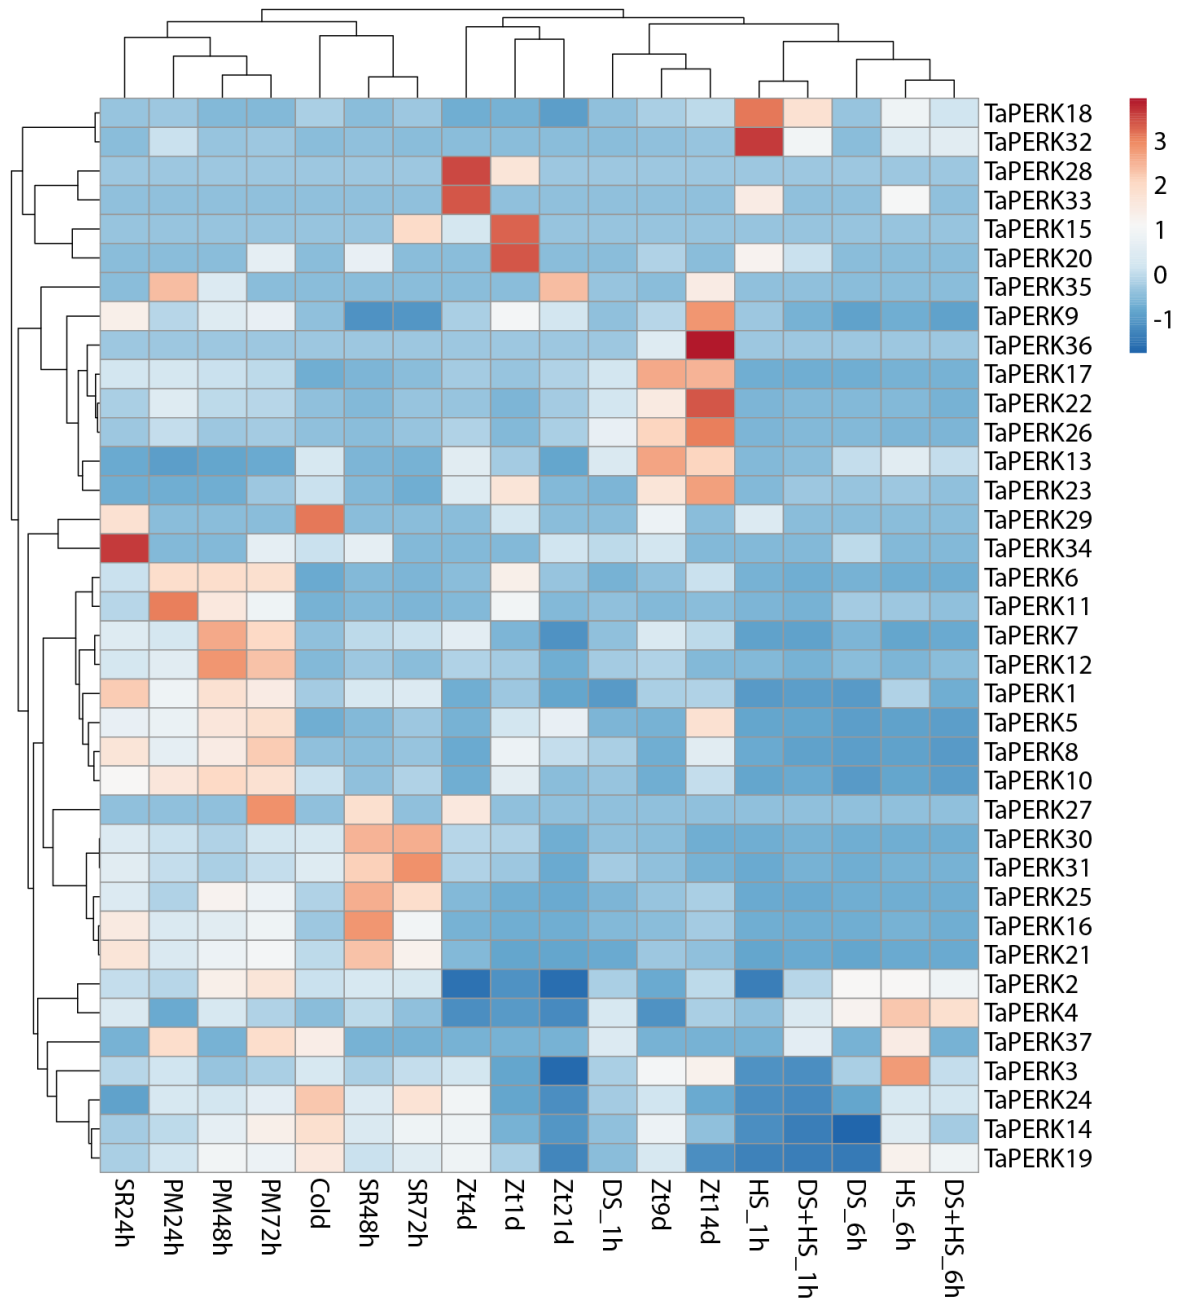

Figure S9. Heatmaps representing the expression pattern of TaPERK genes in different stress conditions. TPM values were directly used to construct the heatmaps. DS: Drought stress, HS: Heat stress, Zt: *Zymoseptoria tritici*, PM: Powdery mildew; SR: Stripe rust, h: hour and d: days.
